# Supplementary material
Source: publisher figshare collection journal article supplement (https://acs.figshare.com/ndownloader/files/3613860)

## Supporting Information

Dynamic Kinetic Asymmetric Cross-Benzoin Additions of  $\beta$ -Stereogenic  $\alpha$ -Keto Esters

C. Guy Goodman, Jeffrey S. Johnson\*

Department of Chemistry, University of North Carolina at Chapel Hill, North Carolina, 27599-3290

[jsj@unc.edu](mailto:jsj@unc.edu)

| Table of Contents                                                         | Page    |
|---------------------------------------------------------------------------|---------|
| General Information (Materials and Methods)                               | S2      |
| Preparation $\alpha$ -keto esters <b>1b-1h</b>                            | S3-5    |
| Preparation of Catalyst D                                                 | S5-6    |
| Full optimization data for the Asymmetric Cross Benzoin of <b>1a/1b</b>   | S6-7    |
| Asymmetric Cross Benzoin Additions                                        | S8-13   |
| Attempting the Cross Benzoin Reaction Using Homo-Benzoin Product <b>3</b> | S14     |
| Procedure for the Gram Scale Asymmetric Cross Benzoin                     | S14     |
| Reduction of Cross Benzoin Products                                       | S14-17  |
| Synthesis of the Mosher ester of <b>2p</b>                                | S16-17  |
| References                                                                | S17     |
| SFC and HPLC traces                                                       | S18-S32 |
| $^1\text{H}$ NMR and $^{13}\text{C}$ NMR data                             | S33-S57 |

## General Information:

**Methods:** Infrared (IR) spectra were obtained using an ASI ReactIR 1000 Fourier transform infrared spectrometer. Proton and carbon magnetic resonance spectra ( $^1\text{H}$  NMR and  $^{13}\text{C}$  NMR) were recorded on a Bruker model DRX 400 or 600 ( $^1\text{H}$  NMR at 400 MHz or 600 MHz and  $^{13}\text{C}$  NMR at 100 MHz or 150 MHz) spectrometer with solvent resonance as the internal standard ( $^1\text{H}$  NMR:  $\text{CDCl}_3$  at 7.26 ppm;  $^{13}\text{C}$  NMR:  $\text{CDCl}_3$  at 77.0 ppm).  $^1\text{H}$  NMR data are reported as follows: chemical shift, multiplicity (s = singlet, br s = broad singlet, d = doublet, dd = doublet of doublet, t = triplet, dt = doublet of triplet, q = quartet, m = multiplet), coupling constants (Hz), and integration. Supercritical fluid chromatography was performed on a Berger SFC system equipped with Chiracel AD, AS, OD, and WO columns as well as Regis Industries RegisPack (RP) column ( $\phi$  4.6 mm x 250 mm). Samples were eluted with SFC grade  $\text{CO}_2$  at the indicated percentage of methanol with an oven temperature of 40 °C. HPLC analysis was performed on an Agilent Technologies 1200 system equipped with Chiralpak IA, IB, and IC columns (constant flow at 1.00 mL/min). Samples were eluted with the indicated percentages of HPLC grade isopropanol in hexanes. Optical rotations were measured using a 2 mL cell with a 1 dm path length on a Jasco DIP 1000 digital polarimeter. Mass spectra were obtained using a Micromass Quattro II (triple quad) instrument with nanoelectrospray ionization. Samples were prepared via diluted with either Methanol (MeOH), 0.1 M ammonium formate (MeOH), or 0.1 M formic acid (MeOH). Analytical thin layer chromatography (TLC) was performed on Sorbtec 0.25 mm silica gel 60 plates. Visualization was accomplished with UV light and/or either aqueous potassium permanganate  $\text{KMnO}_4$  or aqueous ceric ammonium molybdate (CAM) solution followed by heating. Product purification was accomplished using Siliaflash-P60 silica gel (40-63  $\mu\text{m}$ ) purchased from Silicycle. Unless otherwise noted all reactions were carried out in flame-dried glassware with magnetic stirring. Yields and diastereomeric ratios (dr) are reported for a specific experiment and as a result may differ slightly from those found in the reported tables, which represent an average of at least two trials. In order to overlay the SFC traces for the chiral and racemic samples two separate integrations of the peaks must be taken. This results in slight discrepancies between the integration values shown in the report and seen on the trace itself.

**Materials:** NHC catalysts **A-C**,<sup>1-3</sup> **E**,<sup>4</sup>  $\beta$ -halo  $\alpha$ -keto esters **1a**,<sup>5</sup> and 1-tosyl-1*H*-indole-3-carbaldehyde<sup>6</sup> were all prepared according to literature procedures. Potassium carbonate was purchased from Sigma Aldrich and dried under vacuum (5 torr) for 3 h at 110 °C. Methanol (MeOH) was distilled from 3 Å molecular sieves prior to use. HPLC grade chloroform ( $\text{CHCl}_3$ ), ethyl acetate (EtOAc) and ethanol (EtOH) were used directly from the bottle. Dichloromethane (DCM) and tetrahydrofuran (THF) were passed through a column of neutral alumina under nitrogen prior to use. Methyl *t*-butyl ether (MTBE) was distilled prior to use and stored over 4 Å molecular sieves. Benzaldehyde, *o*-tolualdehyde, *m*-tolualdehyde, *p*-tolualdehyde, *p*-anisaldehyde, furfural, and isobutyraldehyde were all purchased from Sigma Aldrich and distilled before use. All other reagents were purchased from commercial sources and were used as received unless otherwise noted. All racemic products were obtained via General Procedure B, Method 1 using Rovis's achiral triazolium catalyst.<sup>2</sup>

### General Procedure A: Preparation of $\alpha$ -keto esters.

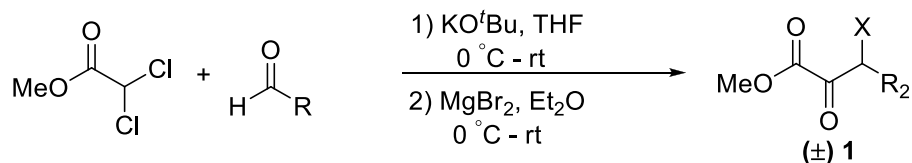

#### Method 1:

The following protocol was adopted from a literature procedure.<sup>5</sup> A 100 mL round-bottomed flask equipped with a magnetic stir bar was charged with aldehyde (10.0 mmol, 1.0 equiv), methyl dichloroacetate (13.0 mmol, 1.3 equiv), and THF (20 mL, 0.5 M). This solution was cooled to  $0\text{ }^\circ\text{C}$  and potassium tert-butoxide (13.0 mmol, 1.3 equiv) was added in one portion. The mixture was warmed slowly to room temperature and stirred for 18 h, followed by dilution with  $\text{Et}_2\text{O}$  (60 mL) and  $\text{H}_2\text{O}$  (60 mL). The layers were separated and the organic layer was further washed with  $\text{H}_2\text{O}$  (1 x 60 mL) and brine (1 x 60 mL). The organic extracts were dried over  $\text{MgSO}_4$ , filtered and concentrated *in vacuo*. The crude residue was then dissolved in  $\text{Et}_2\text{O}$  (30 mL, 0.33 M) and cooled to  $0\text{ }^\circ\text{C}$ . To the resulting solution, magnesium bromide (10.0 mmol, 1.0 equiv) was added in one portion. The reaction was warmed slowly to room temperature and stirred for 2 h followed by dilution with  $\text{Et}_2\text{O}$  (60 mL) and  $\text{H}_2\text{O}$  (60 mL). The layers were separated and the organic layer was further washed with  $\text{H}_2\text{O}$  (1 x 60 mL) and brine (1 x 60 mL). The organic extracts were dried over  $\text{MgSO}_4$ , filtered and concentrated *in vacuo*. The crude residue was purified by column chromatography using a gradient of 10-15% EtOAc/hexanes.

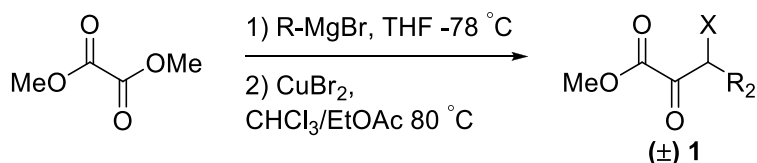

#### Method 2:

The following protocol was adopted from a literature procedure.<sup>7</sup> A 50 mL round-bottomed flask equipped with a magnetic stir bar was charged with dimethyl oxalate (10.0 mmol, 1.0 equiv) and THF (10 mL, 1.0 M). This solution was cooled to  $-78\text{ }^\circ\text{C}$  and the required Grignard reagent (1.0 M solution in THF, 11 mL, 1.1 equiv) was added dropwise. The resulting mixture was stirred at  $-78\text{ }^\circ\text{C}$  for 2 h, quenched with saturated ammonium chloride, then diluted with  $\text{Et}_2\text{O}$  (60 mL) and 1 M HCl (60 mL). The layers were separated and the organic layer was further washed with  $\text{H}_2\text{O}$  (2 x 60 mL) and brine (1 x 60 mL). The organic extracts were dried over  $\text{MgSO}_4$ , filtered and concentrated *in vacuo*. The crude residue was then dissolved in EtOAc (130 mL, 0.075M) and  $\text{CHCl}_3$  (67 mL, 0.15 M). Copper(II) bromide (30 mmol, 3.0 equiv) was added in one portion and the reaction was heated at reflux for 12 h. The reaction was then cooled to room temperature and filtered through celite with  $\text{Et}_2\text{O}$ . The filtrate was concentrated *in vacuo* and the crude residue was purified by column chromatography using a gradient of 10-15% EtOAc/hexanes.

Grignard reagents were prepared according to the following procedure: a 50 mL 2-neck round-bottomed flask fitted with a reflux condenser and septa were charged with magnesium turnings (12.0 mmol, 1.2 equiv). The apparatus was flame-dried under vacuum (<5 torr). After cooling to room temperature, THF (9 mL) was added. A small portion of alkyl bromide (11.0 mmol, 1.1 equiv) dissolved in THF (2 mL) was then added to this solution.

This solution was stirred until color change was observed, indicating reaction initiation. The remainder of the alkyl bromide was then added at a rate that maintained gentle reflux of the reaction mixture. After the addition was complete, the reaction was then aged for 1-2 h at room temperature; and used in the subsequent reaction.

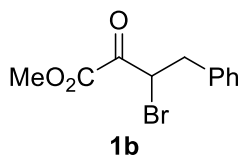

**Methyl 3-bromo-2-oxo-4-phenylbutanoate (1b):** The title compound was prepared according to General Procedure A (Method 1) using phenylacetaldehyde (2.2 mL, 10.0 mmol), affording **1b** (2.5 g, 4.62 mmol, 47% yield) as a yellow oil.

Analytical data for **1b**:  $^1\text{H NMR}$  (600 MHz,  $\text{CDCl}_3$ ):  $\delta$  7.36-7.33 (m, 2H), 7.30-7.27 (m, 3H), 5.30 (t,  $J = 7.8$  Hz, 1H), 3.92 (s, 3H), 3.56 (dd,  $J = 14.4, 7.8$  Hz, 1H) 3.28 (dd,  $J = 14.4, 7.8$  Hz, 1H);  $^{13}\text{C NMR}$  (150 MHz,  $\text{CDCl}_3$ ):  $\delta$  184.8, 160.4, 136.3, 129.3, 128.7, 127.3, 53.4, 47.3, 38.1; **IR** (thin film): 3031, 1733, 1455, 1260, 1068, 1027, 699  $\text{cm}^{-1}$ ; **TLC** (15% EtOAc/hexane):  $R_f = 0.17$ ; **LRMS** (ESI): Calcd. for  $\text{C}_{11}\text{H}_{11}\text{BrO}_3$ : ( $[\text{M}+\text{H}]$ ): 271.00, Found: 271.12.

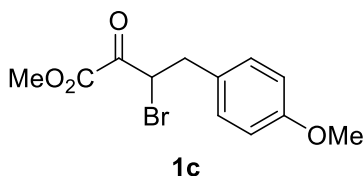

**Methyl 3-bromo-4-(4-methoxyphenyl)-2-oxobutanoate (1c):** The title compound was prepared according to General Procedure A (Method 2) using dimethyl oxalate (0.76 g, 5.7 mmol), affording **1c** (2.5 g, 3.27 mmol, 57% yield) as a yellow oil. Analytical data for **1c**:  $^1\text{H NMR}$  (600 MHz,  $\text{CDCl}_3$ ):  $\delta$  7.16 (d,  $J = 8.4$  Hz, 2H), 6.84 (d,  $J = 8.4$  Hz, 2H), 5.22 (t,  $J = 7.8$  Hz, 1H), 3.89 (s, 3H), 3.78 (s, 3H), 3.48 (dd,  $J = 14.4, 7.8$  Hz, 1H) 3.20 (dd,  $J = 14.4, 7.8$  Hz, 1H);  $^{13}\text{C NMR}$  (150 MHz,  $\text{CDCl}_3$ ):  $\delta$  184.9, 160.4, 158.8, 130.4, 128.4, 114.1, 55.2, 53.4, 47.5, 37.3; **IR** (thin film): 3436, 1731, 1665, 1514, 1249, 1036  $\text{cm}^{-1}$ ; **TLC** (15% EtOAc/hexane):  $R_f = 0.17$ ; **LRMS** (ESI): Calcd. for  $\text{C}_{12}\text{H}_{13}\text{BrO}_4$ : ( $[\text{M}+\text{NH}_4]$ ): 318.03, Found: 318.09.

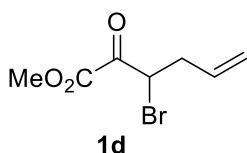

**Methyl 3-bromo-2-oxohex-5-enoate (1d):** The title compound was prepared according to General Procedure A (Method 2) using dimethyl oxalate (0.660 g, 5.0 mmol), affording **1d** (0.320 g, 1.55 mmol, 31% yield) as a yellow oil. Analytical data for **1d**:  $^1\text{H NMR}$  (600 MHz,  $\text{CDCl}_3$ ):  $\delta$  5.79-5.74 (m, 1H), 5.21-5.16 (m, 2H), 5.06-5.04 (t,  $J = 7.8$

Hz, 1H), 3.91 (s, 3H), 2.92-2.87 (m, 1H) 2.75-2.70 (m, 1H);  $^{13}\text{C NMR}$  (150 MHz,  $\text{CDCl}_3$ ):  $\delta$  184.9, 160.7, 132.6, 119.5, 53.4, 46.2, 36.0; **IR** (thin film): 3480, 1736, 1644, 1438, 1258, 1163, 1077  $\text{cm}^{-1}$ ; **TLC** (15% EtOAc/hexane):  $R_f = 0.17$ ; **LRMS** (ESI): Calcd. for  $\text{C}_7\text{H}_9\text{BrO}_3$ : ( $[\text{M}+\text{Na}]$ ): 239.08, Found: 239.16.

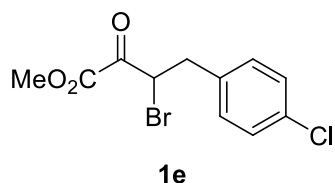

**Methyl 3-bromo-4-(4-chlorophenyl)-2-oxobutanoate (1e):**

The title compound was prepared according to General Procedure A (Method 2) using dimethyl oxalate (0.951 g, 7.2 mmol), affording **1e** (0.66 g, 2.16 mmol, 30% yield) as a yellow oil. Analytical data for **1d**:  $^1\text{H NMR}$  (600 MHz,  $\text{CDCl}_3$ ):  $\delta$  7.27 (d,  $J = 8.4$  Hz, 1H), 7.17 (d,  $J = 8.4$  Hz, 1H), 5.21 (t,  $J = 7.8$  Hz, 1H), 3.88 (s, 3H), 3.47 (dd,  $J = 14.4, 7.8$  Hz, 1H), 3.20 (dd,  $J = 14.4, 7.8$  Hz, 1H);  $^{13}\text{C NMR}$  (150 MHz,  $\text{CDCl}_3$ ):  $\delta$  184.5, 160.3, 134.7, 133.1, 130.6, 128.7, 53.4, 46.9, 37.2; **IR** (thin film): 2955, 1735, 1493, 1255, 1081, 1016  $\text{cm}^{-1}$ ; **TLC** (15% EtOAc/hexane):  $R_f = 0.17$ ; **LRMS** (ESI): Calcd. for  $\text{C}_6\text{H}_7\text{BrO}_3$ : ([M+NH<sub>4</sub>]): 321.98, Found: 322.12.

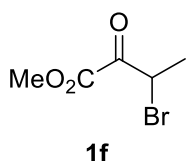

**Methyl 3-bromo-2-oxobutanoate (1f):**

The title compound was prepared according to General Procedure A (Method 1) using acetaldehyde (0.56 mL, 10.0 mmol) and affording **1f** (0.5 g, 2.58 mmol, 26% yield) as a yellow oil whose spectral properties matched those previously reported.<sup>8</sup>

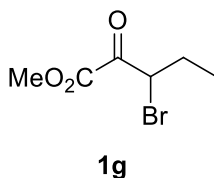

**Methyl 3-bromo-2-oxopentanoate (1g):**

The title compound was prepared according to General Procedure A (Method 1) using propanal (0.72 mL, 10.0 mmol), affording **1g** (0.34 g, 1.62 mmol, 16% yield) as a yellow oil whose spectral properties matched those previously reported.<sup>9</sup>

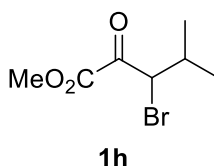

**Methyl 3-bromo-4-methyl-2-oxopentanoate (1h):**

The title compound was prepared according to General Procedure A (Method 1) using isobutyraldehyde (0.912 mL, 10.0 mmol), affording **1h** (0.60 g, 2.70 mmol, 27% yield) as a yellow oil whose spectral properties matched those previously reported.<sup>10</sup>

**Preparation of Catalyst D.**

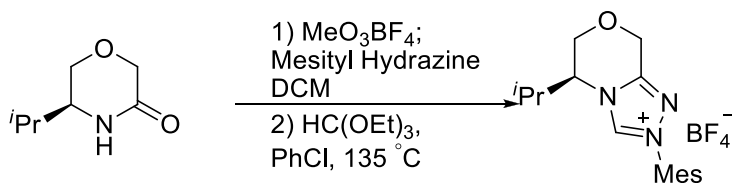

This catalyst was synthesized according to the literature procedure.<sup>2</sup> Under  $\text{N}_2$ , a 50 mL flame-dried round-bottomed flask equipped with a magnetic stir bar was charged with trimethyloxonium tetrafluoroborate (3.6 mmol, 1.0 equiv) and capped with a septum. DCM

(20 mL, 0.2 M) was added under an atmosphere of N<sub>2</sub>. The septum was removed and (S)-5-isopropylmorpholin-3-one<sup>11</sup> was added in a single portion. The flask was capped, put under N<sub>2</sub>, and stirred vigorously for 14 h or until homogenous. Mesityl hydrazine<sup>12</sup> was then added in a single portion and the reaction mixture was stirred for an additional 6 h. The reaction was then concentrated *in vacuo* and dried under high vacuum for 15 min. The crude reaction mixture was dissolved in chlorobenzene (20 mL, 0.2 M) and triethyl orthoformate (18.0 mmol, 5.0 equiv) was added. The reaction flask was equipped with a reflux condenser and heated to open to the atmosphere at 135 °C for 12 h. A second portion of triethyl orthoformate (18.0 mmol, 5.0 equiv) was added and the reaction mixture was heated for an additional 24 h at 135 °C. The flask was then cooled to room temperature, diluted with 200 mL of toluene, and concentrated *in vacuo*. The crude residue was purified by column chromatography using 5% MeOH/DCM. The resultant solid was stirred in Et<sub>2</sub>O (100 mL) for 2 h then filtered, providing **D** (0.62 g, 1.66 mmol, 46% yield) as a tan solid. Analytical data for **2a**: mp 165.2-166.2 °C; <sup>1</sup>H NMR (600 MHz, CDCl<sub>3</sub>): δ 9.76 (s, 1H), 6.99 (s, 1H), 5.09 (d, *J* = 16.2 Hz, 1H) 4.99 (d, *J* = 16.2 Hz, 1H) 4.29-4.20 (m, 2H), 2.48-2.43 (m, 1H), 2.37 (s, 3H), 2.03 (s, 6H) 1.07 (d, *J* = 6.6 Hz, 3H) 0.98 (d, *J* = 6.6 Hz, 3H); <sup>13</sup>C NMR (150 MHz, CDCl<sub>3</sub>): δ 150.3, 143.6, 143.5, 142.0, 131.0, 129.7, 63.7, 61.6, 60.3, 31.8, 21.2, 18.7, 17.5, 17.1; IR (thin film): 3507, 2927, 1796, 1692, 1599, 1226, 1151 cm<sup>-1</sup>; TLC (5% MeOH/DCM): R<sub>f</sub> = 0.21; LRMS (ESI): Calcd. for C<sub>17</sub>H<sub>24</sub>N<sub>3</sub>O: ([M+H-BF<sub>4</sub>]): 287.20, Found: 287.23.

#### Optimization data for the Asymmetric Cross Benzoin of 1a/1b with benzaldehyde.

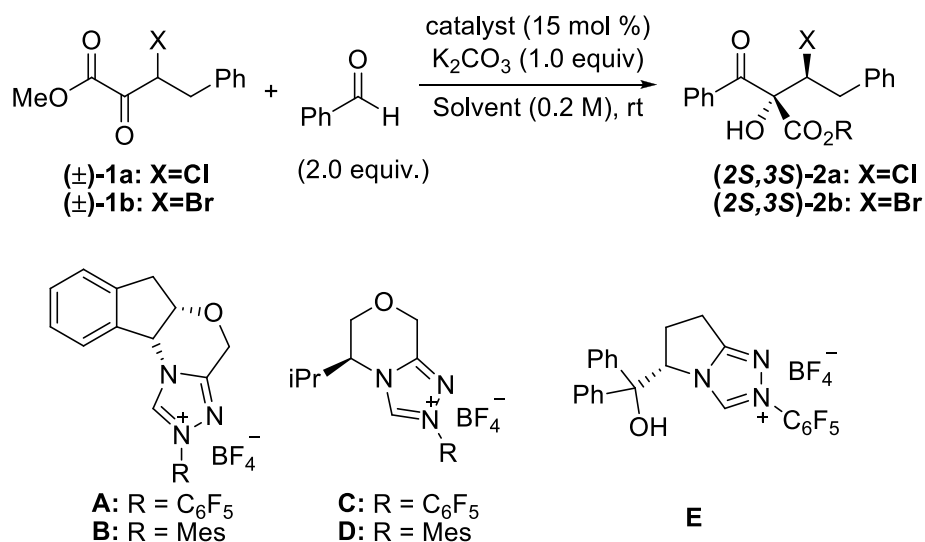

General procedure B for the asymmetric cross benzoin addition: To a flame dried 1-dram vial was added catalyst, (0.03 mmol, 0.15 equiv) β-halo α-keto ester **1** (0.2 mmol, 1.0 equiv), TBME (1 mL, 0.2 M) and aldehyde (0.4 mmol, 2.0 equiv). This solution was stirred for 5 min followed by the addition of potassium carbonate (0.2 mmol, 1.0 equiv). This reaction mixture was then stirred (rate of stirring should be >800 rpm) for 14 h, filtered through a short plug of silica gel, and concentrated *in vacuo*. The crude product was purified by column chromatography using EtOAc/hexanes.

**Catalyst, base and solvent optimization table**

| Trial | X  | catalyst | base                            | solvent            | T (°C) | conversion (%) | dr    | er       |
|-------|----|----------|---------------------------------|--------------------|--------|----------------|-------|----------|
| 1     | Cl | <b>C</b> | NEt <sub>3</sub>                | DCM                | rt     | 100            | 12:1  | 78:22    |
| 2     | Cl | <b>A</b> | NEt <sub>3</sub>                | DCM                | rt     | 100            | 12:1  | 78:22    |
| 3     | Cl | <b>C</b> | NEt <sub>3</sub>                | DCM                | 0      | 100            | 10:1  | 70:30    |
| 4     | Cl | <b>A</b> | NEt <sub>3</sub>                | DCM                | 0      | 100            | 7:1   | 88:12    |
| 5     | Cl | <b>C</b> | NEt <sub>3</sub>                | DCM                | -40    | 45             | 1.4:1 | 99:1     |
| 6     | Cl | <b>A</b> | NEt <sub>3</sub>                | DCM                | -40    | 50             | 5.5:1 | 99:1     |
| 7     | Cl | <b>E</b> | NEt <sub>3</sub>                | DCM                | rt     | <10            | 5.5:1 | --       |
| 8     | Br | <b>C</b> | K <sub>2</sub> CO <sub>3</sub>  | THF                | rt     | <5             | --    | --       |
| 9     | Br | <b>A</b> | K <sub>2</sub> CO <sub>3</sub>  | THF                | rt     | <5             | --    | --       |
| 10    | Br | <b>E</b> | K <sub>2</sub> CO <sub>3</sub>  | THF                | rt     | <5             | --    | --       |
| 11    | Cl | <b>C</b> | K <sub>2</sub> CO <sub>3</sub>  | THF                | rt     | 40             | 1.5:1 | 98:2     |
| 12    | Cl | <b>A</b> | K <sub>2</sub> CO <sub>3</sub>  | THF                | rt     | 25             | 4.5:1 | 96:4     |
| 13    | Br | <b>D</b> | K <sub>2</sub> CO <sub>3</sub>  | THF                | rt     | 30             | --    | --       |
| 14    | Br | <b>B</b> | K <sub>2</sub> CO <sub>3</sub>  | THF                | rt     | >95            | >20:1 | 94:6     |
| 15    | Br | <b>B</b> | K <sub>2</sub> CO <sub>3</sub>  | THF                | 0      | 60             | 7:1   | 96:4     |
| 16    | Cl | <b>D</b> | K <sub>2</sub> CO <sub>3</sub>  | THF                | rt     | 100            | >20:1 | 90:10    |
| 17    | Cl | <b>B</b> | K <sub>2</sub> CO <sub>3</sub>  | THF                | rt     | 100            | 14:1  | 95:5     |
| 18    | Br | <b>B</b> | K <sub>2</sub> CO <sub>3</sub>  | 2-Me               | rt     | 72             | >20:1 | 95:5     |
| 19    | Br | <b>B</b> | K <sub>2</sub> CO <sub>3</sub>  | DCM                | rt     | 23             | >20:1 | --       |
| 20    | Br | <b>B</b> | K <sub>2</sub> CO <sub>3</sub>  | CHCl <sub>3</sub>  | rt     | 16             | >20:1 | --       |
| 21    | Br | <b>B</b> | K <sub>2</sub> CO <sub>3</sub>  | PhCH <sub>3</sub>  | rt     | 78             | >20:1 | 92:8     |
| 22    | Br | <b>B</b> | K <sub>2</sub> CO <sub>3</sub>  | MeOH               | rt     | 100            | *     | --       |
| 23    | Br | <b>B</b> | K <sub>2</sub> CO <sub>3</sub>  | EtOAc              | rt     | 100            | >20:1 | 95:5     |
| 24    | Br | <b>B</b> | K <sub>2</sub> CO <sub>3</sub>  | Et <sub>2</sub> O  | rt     | 100            | >20:1 | 95:5     |
| 25    | Br | <b>B</b> | K <sub>2</sub> CO <sub>3</sub>  | CH <sub>3</sub> CN | rt     | 100            | *     | --       |
| 26    | Br | <b>B</b> | K <sub>2</sub> CO <sub>3</sub>  | CPME               | rt     | 100            | >20:1 | 95.5:4.5 |
| 27    | Br | <b>B</b> | K <sub>2</sub> CO <sub>3</sub>  | TBME               | rt     | 100            | >20:1 | 96:4     |
| 28    | Cl | <b>B</b> | K <sub>2</sub> CO <sub>3</sub>  | Et <sub>2</sub> O  | rt     | 100            | 15:1  | 96.5:4.5 |
| 29    | Cl | <b>B</b> | K <sub>2</sub> CO <sub>3</sub>  | CPME               | rt     | 100            | 15:1  | 97:3     |
| 30    | Cl | <b>B</b> | K <sub>2</sub> CO <sub>3</sub>  | TBME               | rt     | 100            | 14:1  | 97.5:2.5 |
| 31    | Cl | <b>B</b> | NEt <sub>3</sub>                | TBME               | rt     | 50             | 20:1  | 97:3     |
| 32    | Cl | <b>B</b> | DBU                             | TBME               | rt     | 100            | *     | --       |
| 33    | Cl | <b>B</b> | Hunig's                         | TBME               | rt     | 0              | --    | --       |
| 34    | Cl | <b>B</b> | Pyridine                        | TBME               | rt     | 50             | 8:1   | 97.5:2.5 |
| 35    | Cl | <b>B</b> | Cs <sub>2</sub> CO <sub>3</sub> | TBME               | rt     | 100            | >20:1 | 96:4     |
| 36    | Cl | <b>B</b> | DMAP                            | TBME               | rt     | 100            | 17:1  | 97:3     |
| 37    | Br | <b>B</b> | NaOAc                           | TBME               | rt     | 6              | --    | --       |
| 38    | Br | <b>B</b> | NaHCO <sub>3</sub>              | TBME               | rt     | 0              | --    | --       |
| 39    | Br | <b>B</b> | Na <sub>2</sub> CO <sub>3</sub> | TBME               | rt     | 10             | --    | --       |

\* Reaction mixture did not contain any desired Cross-Benzoin product.

### General procedure B for the Asymmetric Cross Benzoin Procedure.

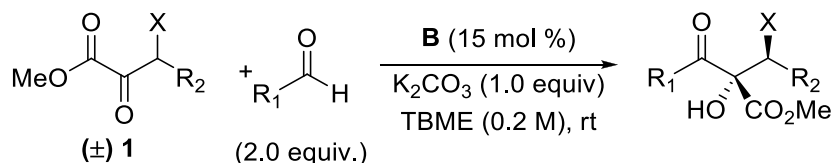

#### Method 1:

To a flame-dried 1-dram vial was added catalyst **B**, (0.03 mmol, 0.15 equiv)  $\beta$ -halo  $\alpha$ -keto ester **1** (0.2 mmol, 1.0 equiv), TBME (1 mL, 0.2 M) and aldehyde (0.4 mmol, 2.0 equiv). This solution was stirred for 5 min followed by the addition of potassium carbonate (0.2 mmol, 1.0 equiv). This reaction mixture was then stirred (rate of stirring should be >800 rpm) for 14 h, filtered through a short plug of silica gel, and concentrated *in vacuo*. The crude product was purified by column chromatography using EtOAc/hexanes. In certain instances minor impurities remained after purification, in these cases a  $^1\text{H}$  NMR yield utilizing ferrocene (20 mg, 0.108 mmol) as an internal standard is provided.

#### Method 2:

To a flame dried 1-dram vial was added catalyst **B**, (0.03 mmol, 0.15 equiv)  $\beta$ -halo  $\alpha$ -keto ester **1** (0.2 mmol, 1.0 equiv), and TBME (.5 mL, 0.4 M) followed by potassium carbonate (0.4 mmol, 2.0 equiv). This reaction mixture was then stirred (rate of stirring should be >800 rpm) while a 0.8 M solution of aldehyde in TBME (0.5 mL, 2.0 equiv) was added in 50  $\mu\text{L}$  portions every 30 min for 5 h. Upon complete aldehyde addition the reaction was stirred an additional 9 h then filtered through a short plug of silica gel with  $\text{Et}_2\text{O}$ , and concentrated *in vacuo*. The crude residue was then purified by column chromatography using between 2.5% EtOAc/hexanes.

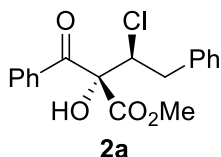

#### Methyl (2S,3S)-2-benzoyl-3-chloro-2-hydroxy-4-phenylbutanoate

**(2a):** The title compound was prepared according to General Procedure B (Method 1) using  $\alpha$ -keto ester **1a** (0.045 g, 0.20 mmol), and benzaldehyde (0.04 mL, 0.40 mmol) affording **2a** (0.064 g, 0.19 mmol, 96% yield, 12:1 dr) as a colorless oil. Analytical data for **2a**:  $^1\text{H}$  NMR

(600 MHz,  $\text{CDCl}_3$ ):  $\delta$  8.05 (d,  $J$  = 7.8 Hz, 2H), 7.60-7.58 (m, 1H), 7.48-7.45 (m, 2H), 7.35-7.33 (m, 5H), 7.28-7.26 (m, 1H), 5.15 (dd,  $J$  = 10.7, 2.1 Hz, 1H) 4.30 (s, 1H), 3.82 (s, 3H), 3.24 (dd,  $J$  = 14.4, 2.2 Hz, 1H) 2.91 (dd,  $J$  = 14.4, 10.7 Hz, 1H);  $^{13}\text{C}$  NMR (150 MHz,  $\text{CDCl}_3$ ):  $\delta$  193.6, 170.4, 137.7, 134.6, 133.8, 129.8, 129.5, 128.5, 128.4, 126.9, 86.3, 67.1, 54.4, 39.1; IR (thin film): 3507, 2927, 1796, 1692, 1599, 1226, 1151  $\text{cm}^{-1}$ ; TLC (10% EtOAc/hexane):  $R_f$  = 0.26; LRMS (ESI): Calcd. for  $\text{C}_{18}\text{H}_{17}\text{ClO}_4$ :  $[\text{M}+\text{H}]^+$ : 333.09, Found: 333.21; SFC: Regis RP, 5% MeOH, flow rate = 3.0 mL/min,  $\lambda$  = 210 nm,  $t_{\text{R (major)}}$  = 3.7 min  $t_{\text{R (minor)}}$  = 4.3 min, 96:4 er;  $[\alpha]_{\text{D}} = +45.8$  ( $c$  = 0.03, DCM)



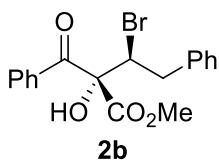

**Methyl (2S,3S)-2-benzoyl-3-bromo-2-hydroxy-4-phenylbutanoate**

**(2b):** The title compound was prepared according to General Procedure B (Method 1) using  $\alpha$ -keto ester **1b** (0.054 g, 0.20 mmol), and benzaldehyde (0.04 mL, 0.40 mmol) affording **2b** (0.071 g major product + minor impurity, 78%  $^1\text{H}$  NMR yield, >20:1 dr) as a colorless oil.

Analytical data for **2a**:  $^1\text{H}$  NMR (600 MHz,  $\text{CDCl}_3$ ):  $\delta$  8.07 (d,  $J$  = 7.8 Hz, 2H), 7.61-7.58 (m, 1H), 7.47-7.45 (m, 2H), 7.34-7.19 (m, 5H), 5.22-5.20 (m, 1H) 4.37 (s, 1H), 3.85 (s, 3H), 3.32-3.31 (m, 1H) 3.04-2.98 (m, 1H);  $^{13}\text{C}$  NMR (150 MHz,  $\text{CDCl}_3$ ):  $\delta$  193.4, 170.5, 138.2, 134.7, 133.8, 129.8, 129.4, 128.5, 128.3, 126.9, 86.5, 60.9, 54.4, 39.9; IR (thin film): 3066, 2089, 2699, 1746, 1692, 1421, 1244  $\text{cm}^{-1}$ ; TLC (10% EtOAc/hexane):  $R_f$  = 0.26; LRMS (ESI): Calcd. for  $\text{C}_{18}\text{H}_{17}\text{BrO}_4$ : ([M+H]): 377.23, Found: 377.15; SFC: Regis RP, 5% MeOH, flow rate = 3.0 mL/min,  $\lambda$  = 210 nm,  $t_R$  (major) = 4.5 min  $t_R$  (minor) = 5.0 min, 96:4 er;  $[\alpha]_D = +39.8$  ( $c$  = 0.03, DCM)

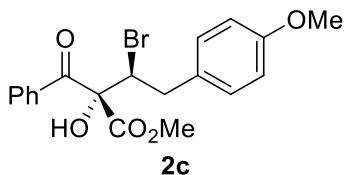

**Methyl (2S,3S)-2-benzoyl-3-bromo-2-hydroxy-4-(4-methoxyphenyl)butanoate**

**(2c):** The title compound was prepared according to General Procedure B (Method 2) using  $\alpha$ -keto ester **1c** (0.060 g, 0.20 mmol), and benzaldehyde (0.04 mL, 0.40 mmol) affording **2c** (0.050g, major product + homo-

benzoin impurity 83 %  $^1\text{H}$  NMR yield, >20:1 dr) as a colorless oil. Analytical data for **2a**:  $^1\text{H}$  NMR (600 MHz,  $\text{CDCl}_3$ ):  $\delta$  8.06 (d,  $J$  = 7.8 Hz, 2H), 7.60-7.57 (m, 1H), 7.47-7.44 (m, 2H), 7.26-7.23 (m, 2H) 6.87 (d,  $J$  = 8.4 Hz, 2H), 5.16 (dd,  $J$  = 10.8, 2.3 Hz, 1H) 4.35 (s, 1H), 3.82-3.81 (m, 6H), 3.24 (dd,  $J$  = 15.0, 2.3 Hz, 1H) 2.95 (dd,  $J$  = 15.0, 10.8 Hz, 1H);  $^{13}\text{C}$  NMR (150 MHz,  $\text{CDCl}_3$ ):  $\delta$  193.4, 170.5, 158.5, 134.7, 133.8, 130.4, 130.3, 129.8, 128.5, 113.7, 86.5, 61.5, 55.2, 54.4, 39.0; IR (thin film): 3059, 2989, 2306, 1715, 1429, 1267, 896  $\text{cm}^{-1}$ ; TLC (10% EtOAc/hexane):  $R_f$  = 0.14; LRMS (ESI): Calcd. for  $\text{C}_{19}\text{H}_{19}\text{BrO}_5$ : ([M+H]): 407.05, Found: 407.08; SFC: Regis RP, 5% MeOH, flow rate = 3.0 mL/min,  $\lambda$  = 210 nm, **2c** could not be directly analyzed via SFC, see compound **4c** for enantiomeric analysis;  $[\alpha]_D = +39.8$  ( $c$  = 0.03, DCM)

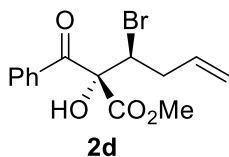

**Methyl (2S,3S)-2-benzoyl-3-bromo-2-hydroxyhex-5-enoate**

**(2d):** The title compound was prepared according to General Procedure B (Method 1) using  $\alpha$ -keto ester **1d** (0.044 g, 0.20 mmol), and benzaldehyde (0.04 mL, 0.40 mmol) affording **2d** (0.046g, 0.15 mmol, 74% yield, 17:1 dr) as a white solid. Analytical data for **2d**: mp 68.6-

70.0  $^{\circ}\text{C}$ ;  $^1\text{H}$  NMR (600 MHz,  $\text{CDCl}_3$ ):  $\delta$  8.01-8.00 (m, 2H), 7.58-7.57 (m, 1H), 7.45-7.42 (m, 2H), 5.89-5.83 (m, 1H) 5.17-5.14 (m, 2H) 5.02 (dd,  $J$  = 10.8, 3 Hz, 1H), 4.22 (s, 1H), 3.83 (s, 3H), 2.68-2.65 (m, 1H) 2.64-2.56 (m, 1H);  $^{13}\text{C}$  NMR (150 MHz,  $\text{CDCl}_3$ ):  $\delta$  193.4, 170.5, 134.72, 134.70, 133.7, 129.8, 128.5, 118.2, 86.4, 58.9, 54.4, 37.8; IR (thin film): 3059, 2989, 2306, 1715, 1614, 1420, 1267  $\text{cm}^{-1}$ ; TLC (10% EtOAc/hexane):  $R_f$  = 0.22; LRMS (ESI): Calcd. for  $\text{C}_{14}\text{H}_{15}\text{BrO}_4$ : ([M+Na]): 350.16, Found: 350.16; **2d** could not be directly analyzed via SFC, see compound **4d** for enantiomeric analysis;  $[\alpha]_D = +14.8$  ( $c$  = 0.01, DCM).

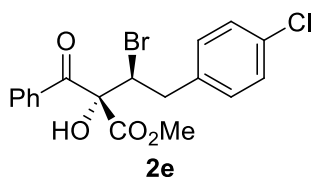

**Methyl (2S,3S)-2-benzoyl-3-bromo-4-(4-chlorophenyl)-2-hydroxybutanoate (2e):** The title compound was prepared according to General Procedure B (Method 1) using  $\alpha$ -keto ester **1e** (0.061 g, 0.20 mmol), and benzaldehyde (0.04 mL, 0.40 mmol) affording **2e** (0.050 g, 0.12 mmol, 61% yield, 12:1 dr) as a colorless oil. Analytical data for **2e**:  $^1\text{H NMR}$  (600 MHz,  $\text{CDCl}_3$ ):  $\delta$  8.07 (d,  $J = 4.2$  Hz, 2H), 7.63-7.61 (m, 1H), 7.50-7.47 (m, 2H), 7.36-7.28 (m, 4H), 5.16-5.14 (m, 1H) 4.36 (s, 1H), 3.85 (s, 3H), 3.30 (d,  $J = 15.0$  Hz, 1H) 3.00 (dd,  $J = 15.0, 10.8$  Hz, 1H);  $^{13}\text{C NMR}$  (150 MHz,  $\text{CDCl}_3$ ):  $\delta$  193.3, 170.4, 136.7, 134.5, 133.9, 132.7, 130.7, 129.8, 128.5, 128.5, 86.3, 60.5, 54.5, 39.3; **IR** (thin film): 3507, 3059, 2309, 1748, 1692, 1228, 1151  $\text{cm}^{-1}$ ; **TLC** (10% EtOAc/hexane):  $R_f = 0.21$ ; **LRMS** (ESI): Calcd. for  $\text{C}_{18}\text{H}_{16}\text{BrClO}_4$ : ( $[\text{M}+\text{H}]$ ): 411.00, Found: 411.14; **2e** could not be directly analyzed via SFC, see compound **4e** for enantiomeric analysis;  $[\alpha]_D = +44.9$  ( $c = 0.02$ , DCM).

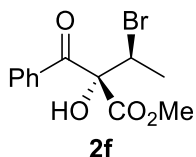

**Methyl (2S,3S)-2-benzoyl-3-bromo-2-hydroxybutanoate (2f):** The title compound was prepared according to General Procedure B (Method 1) using  $\alpha$ -keto ester **1f** (0.039 g, 0.20 mmol), and benzaldehyde (0.04 mL, 0.40 mmol) affording **2f** (0.042g, 0.14 mmol, 70% yield, 14:1 dr) as a colorless oil. Analytical data for **2f**:  $^1\text{H NMR}$  (600 MHz,  $\text{CDCl}_3$ ):  $\delta$  8.02 (d,  $J = 7.8$  Hz, 2H), 7.58-7.55 (m, 1H), 7.44-7.42 (m, 2H), 5.16 (q,  $J = 6.6$  Hz, 1H) 4.17 (s, 1H), 3.83 (s, 3H), 1.72 (d,  $J = 6.6$  Hz, 3H);  $^{13}\text{C NMR}$  (150 MHz,  $\text{CDCl}_3$ ):  $\delta$  193.0, 170.7, 134.6, 133.8, 129.8, 128.5, 86.2, 54.3, 53.4, 20.6; **IR** (thin film): 3507, 2936, 2309, 1746, 1692, 1166, 1050  $\text{cm}^{-1}$ ; **TLC** (10% EtOAc/hexane):  $R_f = 0.24$ ; **LRMS** (ESI): Calcd. for  $\text{C}_{12}\text{H}_{13}\text{BrO}_4$ : ( $[\text{M}+\text{H}]$ ): 301.01, Found: 300.99; **SFC**: Chiracel AD, 5% MeOH, flow rate = 1.5 mL/min,  $\lambda = 210$  nm,  $t_R$  (major) = 5.7 min  $t_R$  (minor) = 6.1 min, 93:7 er;  $[\alpha]_D = +26.1$  ( $c = 0.02$ , DCM)

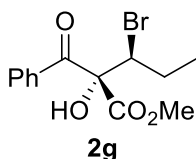

**Methyl (2S,3S)-2-benzoyl-3-bromo-2-hydroxypentanoate (2g):** The title compound was prepared according to General Procedure B (Method 1) using  $\alpha$ -keto ester **1g** (0.042 g, 0.20 mmol), and benzaldehyde (0.04 mL, 0.40 mmol) affording **2g** (0.046g, 0.15 mmol, 73% yield, >20:1 dr) as a white solid. Analytical data for **2g**:  $^1\text{H NMR}$  (600 MHz,  $\text{CDCl}_3$ ):  $\delta$  8.01-8.00 (m, 2H), 7.58-7.55 (m, 1H), 7.44-7.42 (m, 2H), 4.92 (dd,  $J = 9, 4.2$  Hz, 1H) 4.17 (s, 1H), 3.83 (s, 3H), 1.87-1.82 (m, 2H), 1.11 (t,  $J = 7.2$  Hz, 3H);  $^{13}\text{C NMR}$  (150 MHz,  $\text{CDCl}_3$ ):  $\delta$  193.7, 170.6, 134.8, 133.7, 129.8, 128.5, 86.8, 62.8, 54.4, 26.9, 12.8; **IR** (thin film): 3507, 2935, 1748, 1692, 1228, 1189  $\text{cm}^{-1}$ ; **TLC** (10% EtOAc/hexane):  $R_f = 0.24$ ; **LRMS** (ESI): Calcd. for  $\text{C}_{13}\text{H}_{15}\text{BrO}_4$ : ( $[\text{M}+\text{H}]$ ): 315.02, Found: 315.06; **SFC**: Chiracel AD, 5% MeOH, flow rate = 1.5 mL/min,  $\lambda = 210$  nm,  $t_R$  (major) = 5.9 min  $t_R$  (minor) = 6.4 min, 94:6 er;  $[\alpha]_D = +12.5$  ( $c = 0.02$ , DCM)

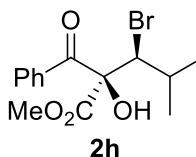

**Methyl (2R,3S)-2-benzoyl-3-bromo-2-hydroxy-4-methylpentanoate (2h):** The title compound was prepared according to General Procedure B

(Method 1) using  $\alpha$ -keto ester **1h** (0.044 g, 0.20 mmol), benzaldehyde (0.04 mL, 0.40 mmol) and mesitylene as an internal standard (0.028 mL, 0.20 mmol) affording **2h** (0.026g, 0.08 mmol, 65%  $^1\text{H}$  NMR yield, 40% isolated yield, >20:1 dr) as a colorless oil. Analytical data for **2h**:  $^1\text{H}$  NMR (600 MHz,  $\text{CDCl}_3$ ):  $\delta$  7.98 (d,  $J$  = 7.2 Hz, 2H), 7.57-7.55 (m, 1H), 7.44-7.42 (m, 2H), 5.08 (d,  $J$  = 3 Hz, 1H) 4.22 (s, 1H), 3.83 (s, 3H), 2.09-2.05 (m, 1H), 1.06 (d,  $J$  = 6.6 Hz, 3H) 1.00 (d,  $J$  = 6.6 Hz, 3H);  $^{13}\text{C}$  NMR (150 MHz,  $\text{CDCl}_3$ ):  $\delta$  193.5, 170.7, 135.0, 133.5, 129.8, 128.4, 88.0, 67.2, 54.4, 31.5, 23.1, 19.8; IR (thin film): 3507, 2966, 1740, 1692, 1159, 409  $\text{cm}^{-1}$ ; TLC (10% EtOAc/hexane):  $R_f$  = 0.29; LRMS (ESI): Calcd. for  $\text{C}_{14}\text{H}_{17}\text{BrO}_4$ : ([M+H]): 329.03, Found: 329.13; SFC: Regis RP, 5% MeOH, flow rate = 1.5 mL/min,  $\lambda$  = 210 nm,  $t_R$  (major) = 4.0 min  $t_R$  (minor) = 4.3 min, 94:6 er;  $[\alpha]_D = +18.3$  ( $c$  = 0.01, DCM)

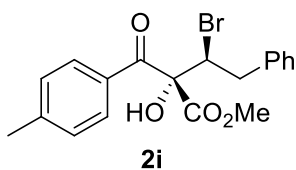

**Methyl (2S,3S)-3-bromo-2-hydroxy-2-(4-methylbenzoyl)-4-phenylbutanoate (2i)**: The title compound was prepared according to General Procedure B (Method 1) using  $\alpha$ -keto ester **1b** (0.054 g, 0.20 mmol), and *p*-tolualdehyde (0.05 mL, 0.40 mmol) affording **2i** (0.060g, 0.15 mmol, 77% yield, >20:1 dr) as a

colorless oil. Analytical data for **2i**:  $^1\text{H}$  NMR (600 MHz,  $\text{CDCl}_3$ ):  $\delta$  8.02 (d,  $J$  = 7.8 Hz, 2H), 7.36-7.28 (m, 7H), 5.23 (dd,  $J$  = 10.7, 2.3 Hz, 1H) 4.36 (s, 1H), 3.84 (s, 3H), 3.34 (dd,  $J$  = 14.6, 2.3 Hz, 1H) 3.02 (dd,  $J$  = 14.6, 10.7 Hz, 1H), 2.45 (s, 3H);  $^{13}\text{C}$  NMR (150 MHz,  $\text{CDCl}_3$ ):  $\delta$  192.7, 170.6, 145.0, 138.3, 132.0, 130.0, 129.4, 129.2, 128.3, 126.8, 86.4, 61.1, 54.3, 39.9, 21.7; IR (thin film): 3507, 2927, 1746, 1684, 1607, 1151  $\text{cm}^{-1}$ ; TLC (10% EtOAc/hexane):  $R_f$  = 0.24; LRMS (ESI): Calcd. for  $\text{C}_{19}\text{H}_{19}\text{BrO}_4$ : ([M+H]): 391.05, Found: 391.15; SFC: Regis RP, 10% MeOH, flow rate = 1.5 mL/min,  $\lambda$  = 210 nm,  $t_R$  (major) = 9.7 min  $t_R$  (minor) = 11.1 min, 97:3 er;  $[\alpha]_D = +20.7$  ( $c$  = 0.02, DCM)

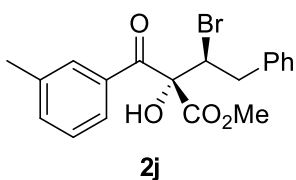

**Methyl (2S,3S)-3-bromo-2-hydroxy-2-(3-methylbenzoyl)-4-phenylbutanoate (2j)**: The title compound was prepared according to General Procedure B (Method 1) using  $\alpha$ -keto ester **1b** (0.054 g, 0.20 mmol), and *m*-tolualdehyde (0.05 mL, 0.40 mmol) affording **2j** (0.066g, 0.17 mmol, 85% yield, >20:1 dr) as a

colorless oil. Analytical data for **2j**:  $^1\text{H}$  NMR (600 MHz,  $\text{CDCl}_3$ ):  $\delta$  7.87-7.84 (m, 2H), 7.41-7.40 (m, 1H), 7.35-7.26 (m, 6H), 5.22 (m, 1H) 4.31 (s, 1H), 3.82 (s, 3H), 3.31-3.28 (d,  $J$  = 12.6 Hz, 1H) 3.02-2.97 (dd,  $J$  = 14.4, 11.4 Hz, 1H), 2.41 (s, 3H);  $^{13}\text{C}$  NMR (150 MHz,  $\text{CDCl}_3$ , two coincident aromatic resonances):  $\delta$  193.7, 170.5, 138.4, 138.2, 134.7, 134.6, 130.2, 129.4, 128.4, 127.0, 126.9, 86.5, 70.0, 54.4, 39.9, 21.4 (two coincident resonances); IR (thin film): 3507, 2927, 1746, 1692, 1607, 1143  $\text{cm}^{-1}$ ; TLC (10% EtOAc/hexane):  $R_f$  = 0.24; LRMS (ESI): Calcd. for  $\text{C}_{19}\text{H}_{19}\text{BrO}_4$ : ([M+Na]): 413.04, Found: 413.12; HPLC: Chiralpak IC, 5% *i*PrOH, flow rate = 1.0 mL/min,  $\lambda$  = 230 nm,  $t_R$  (major) = 5.1 min  $t_R$  (minor) = 5.7 min, 96:4 er;  $[\alpha]_D = +39.8$  ( $c$  = 0.03, DCM)

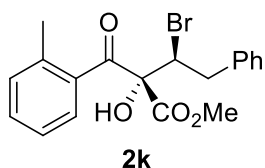

**Methyl (2S,3S)-3-bromo-2-hydroxy-2-(2-methylbenzoyl)-4-phenylbutanoate (2k):** No reaction was observed using General Procedure B (Method 1) with  $\alpha$ -keto ester **1b** (0.054 g, 0.20 mmol), and *o*-tolualdehyde (0.05 mL, 0.40 mmol).

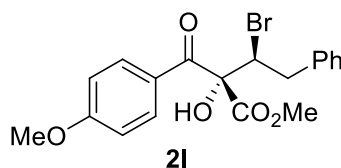

**Methyl (2S,3S)-3-bromo-2-hydroxy-2-(4-methoxybenzoyl)-4-phenylbutanoate (2l):** The title compound was prepared according to General Procedure B (Method 1) using  $\alpha$ -keto ester **1b** (0.054 g, 0.20 mmol), *p*-anisaldehyde (0.05 mL, 0.40 mmol), and mesitylene as an internal standard (0.028 mL, 0.20

mmol) resulting in 50% conversion of **1b** and affording **2l** (0.040 g, 0.10 mmol, 49% yield, >20:1 dr) as a colorless oil. Analytical data for **2l**:  $^1\text{H NMR}$  (400 MHz,  $\text{CDCl}_3$ ):  $\delta$  8.13 (d,  $J$  = 8.8 Hz, 2H), 7.33-7.32 (m, 5H), 6.93 (d,  $J$  = 8.8 Hz, 2H), 5.20 (dd,  $J$  = 10.7, 2.2 Hz, 1H) 4.33 (s, 1H), 3.88 (s, 3H), 3.80 (s, 3H), 3.33 (dd,  $J$  = 14.8, 2.2 Hz, 1H) 2.99 (dd,  $J$  = 14.8, 10.7 Hz, 1H);  $^{13}\text{C NMR}$  (150 MHz,  $\text{CDCl}_3$ ):  $\delta$  191.1, 107.8, 164.2, 138.3, 132.6, 129.4, 128.3, 127.3, 126.8, 113.8, 86.4, 61.3, 55.5, 54.3, 39.9; **IR** (thin film): 3066, 2989, 2309, 1746, 1684, 1599, 1420, 1159  $\text{cm}^{-1}$ ; **TLC** (10% EtOAc/hexane):  $R_f$  = 0.15; **LRMS** (ESI): Calcd. for  $\text{C}_{19}\text{H}_{19}\text{BrO}_5$ : ([M+Na]): 429.03, Found: 429.18; **SFC**: Regis RP, 10% MeOH, flow rate = 1.5 mL/min,  $\lambda$  = 210 nm,  $t_R$  (major) = 9.7 min  $t_R$  (minor) = 12.1 min, 98:2 er;  $[\alpha]_D^{25}$  = +8.23 ( $c$  = 0.02, DCM)

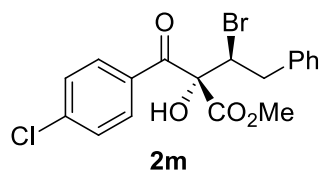

**Methyl (2S,3S)-3-bromo-2-hydroxy-2-(4-chlorobenzoyl)-2-hydroxy-4-phenylbutanoate (2m):** The title compound was prepared according to General Procedure B (Method 1) using  $\alpha$ -keto ester **1b** (0.054 g, 0.20 mmol), 4-Chlorobenzaldehyde (0.056 g, 0.40 mmol) and mesitylene as an internal standard (0.028 mL, 0.20

mmol) resulting in 71% conversion of **1b** and affording **2m** (0.036 g, 0.09 mmol, 44% yield >20:1 dr) as a colorless oil. With 20 mol % of catalyst **1b** went to full conversion and **2m** was obtained with identical selectivity but higher isolated yield (0.066 g, 0.16 mmol, 80% yield >20:1 dr). Analytical data for **2m**:  $^1\text{H NMR}$  (600 MHz,  $\text{CDCl}_3$ ):  $\delta$  8.02 (d,  $J$  = 8.4 Hz, 2H), 7.43 (d,  $J$  = 8.4 Hz, 2H), 7.34-7.33 (m, 4H), 7.29-7.26 (m, 1H), 5.17 (dd,  $J$  = 10.8, 1.8 Hz, 1H) 4.27 (s, 1H), 3.82 (s, 3H), 3.30 (dd,  $J$  = 15.0, 1.8 Hz, 1H) 3.00 (dd,  $J$  = 15.0, 10.8 Hz, 1H);  $^{13}\text{C NMR}$  (150 MHz,  $\text{CDCl}_3$ ):  $\delta$  192.1, 170.4, 140.5, 138.1, 132.9, 131.4, 129.4, 128.8, 128.4, 127.0, 86.6, 60.8, 54.5, 39.9; **IR** (thin film): 3630, 3507, 3059, 2958, 2308, 1746, 1692, 1591, 1097, 1026  $\text{cm}^{-1}$ ; **TLC** (10% EtOAc/hexane):  $R_f$  = 0.28; **LRMS** (ESI): Calcd. for  $\text{C}_{18}\text{H}_{16}\text{BrClO}_4$ : ([M+Na]): 411.00, Found: 411.14; **2m** could not be directly analyzed via SFC, see compound **4m** for enantiomeric analysis;  $[\alpha]_D^{25}$  = +24.6 ( $c$  = 0.03, DCM)

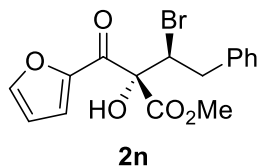

**Methyl (2S,3S)-3-bromo-2-hydroxy-2-(furan-2-carbonyl)-2-hydroxy-4-phenylbutanoate (2n):** The title compound was prepared according to General Procedure B (Method 1) using  $\alpha$ -keto ester **1b** (0.054 g,

0.20 mmol), and furfural (0.03 mL, 0.40 mmol) affording **2n** (0.052g, 0.14 mmol, 71% yield, >20:1 dr) as a colorless oil. Analytical data for **2n**:  $^1\text{H NMR}$  (600 MHz,  $\text{CDCl}_3$ ):  $\delta$  7.69 (d,  $J$  = 1.2 Hz, 1H), 7.64 (d,  $J$  = 3.6 Hz, 1H), 7.32-7.29 (m, 4H), 6.58 (dd,  $J$  = 3.6, 1.2 Hz, 1H), 5.15 (dd,  $J$  = 11.4, 2.4 Hz, 1H) 4.47 (s, 1H), 3.81 (s, 3H), 3.28 (dd,  $J$  = 15.0, 2.4 Hz, 1H) 3.00 (dd,  $J$  = 14.4, 10.8 Hz, 1H);  $^{13}\text{C NMR}$  (150 MHz,  $\text{CDCl}_3$ ):  $\delta$  180.9, 169.8, 149.5, 148.2, 138.0, 129.4, 128.3, 126.9, 123.1, 112.6, 85.8, 59.7, 54.4, 39.6; **IR** (thin film): 3507, 1746, 167, 1466, 1159, 1027, 818, 617  $\text{cm}^{-1}$ ; **TLC** (10% EtOAc/hexane):  $R_f$  = 0.35; **LRMS** (ESI): Calcd. for  $\text{C}_{16}\text{H}_{15}\text{BrO}_5$ : ( $[\text{M}+\text{H}]$ ): 367.02, Found: 367.02; **SFC**: Regis RP, 5% MeOH, flow rate = 3.0 mL/min,  $\lambda$  = 210 nm,  $t_R$  (major) = 4.3 min  $t_R$  (minor) = 7.0 min, 75.5:25.5 er;  $[\alpha]_D = +4.7$  ( $c$  = 0.02, DCM)

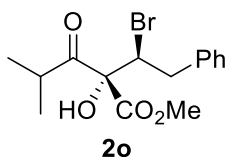

**Methyl (S)-2-((S)-1-bromo-2-phenylethyl)-2-hydroxy-4-methyl-3-oxopentanoate (2o)**: The title compound was prepared according to General Procedure B (Method 2) using  $\alpha$ -keto ester **1b** (0.054 g, 0.20 mmol), and isobutyraldehyde (0.02 mL, 0.40 mmol) affording **2o** (0.039 g, 0.12 mmol, 59% yield 10:1 dr) as a colorless oil. Analytical data for

**2n**:  $^1\text{H NMR}$  (600 MHz,  $\text{CDCl}_3$ ):  $\delta$  7.33-7.30 (m, 2H), 7.27-7.25 (m, 3H), 5.75 (dd,  $J$  = 9.0, 4.5 Hz, 1H) 3.86 (s, 3H), 3.25 (dd,  $J$  = 14.1, 4.5 Hz, 1H) 3.07 (dd,  $J$  = 14.1, 9.0 Hz, 1H) 2.61-2.57 (m, 1H), 1.15 (d,  $J$  = 7.2 Hz, 3H), 1.11 (d,  $J$  = 7.2 Hz, 3H);  $^{13}\text{C NMR}$  (150 MHz,  $\text{CDCl}_3$ ):  $\delta$  189.5, 176.3, 160.2, 135.3, 129.4, 128.5, 127.2, 75.7, 53.1, 36.2, 33.4, 18.64, 18.60; **IR** (thin film): 3059, 2989, 2688, 2410, 2308, 1760, 1429, 1267, 896  $\text{cm}^{-1}$ ; **TLC** (10% EtOAc/hexane):  $R_f$  = 0.15; **LRMS** (ESI): Calcd. for  $\text{C}_{15}\text{H}_{19}\text{BrO}_4$ : ( $[\text{M}+\text{H}]$ ): 343.05, Found: 343.04; **HPLC**: Chiralpak IC, 5%  $i$ PrOH, flow rate = 1.0 mL/min,  $\lambda$  = 230 nm,  $t_R$  (major) = 9.1 min  $t_R$  (minor) = 9.9 min, 58:42 er;  $[\alpha]_D = +2.3$  ( $c$  = 0.02, DCM)

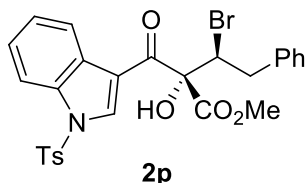

**Methyl (2S,3S)-3-bromo-2-hydroxy-4-phenyl-2-(1-tosyl-1H-indole-3-carbonyl)butanoate (2p)**: The title compound was prepared according to General Procedure B (Method 1) using  $\alpha$ -keto ester **1b** (0.054 g, 0.20 mmol), and 1-tosyl-1H-indole-3-carbaldehyde (0.119 g, 0.40 mmol). **2a** was not isolable from 1-tosyl-1H-indole-3-carbaldehyde and was reduced with  $\text{NaBH}_4$  **4p** (0.074 g, 0.13 mmol, 65% yield, 10:1 dr), was isolated by column chromatography using 15% EtOAc/hexanes. See compound **4p** for all characterization data.

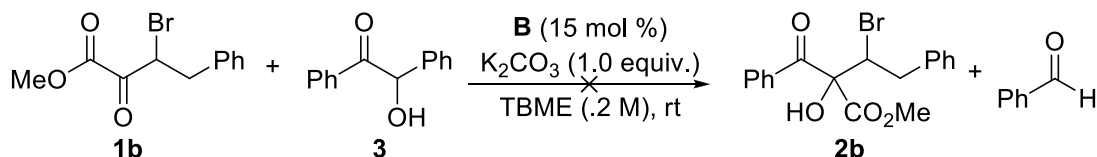

### Attempting the Cross Benzoin Reaction Using Homo-Benzoin Product 3.

To a flame dried 1-dram vial was added catalyst **B**, (0.03 mmol, 0.15 equiv)  $\beta$ -halo  $\alpha$ -keto ester **1** (0.2 mmol, 1.0 equiv), TBME (1 mL, 0.2 M) and benzoin product **3** (0.2 mmol, 1.0 equiv). This solution stirred for 5 minutes followed by the addition of potassium carbonate (0.2 mmol, 1.0 equiv). This reaction was stirred for 14 h, filtered through a short plug of silica gel with Et<sub>2</sub>O, and concentrated *in vacuo* for analysis by <sup>1</sup>H NMR.

### Procedure for the Gram Scale Asymmetric Cross Benzoin.

To a flame dried 50 mL round bottom flask was added catalyst **B**, (0.55 mmol, 0.15 equiv)  $\beta$ -halo  $\alpha$ -keto ester **1** (3.7 mmol, 1.0 equiv), TBME (19 mL, 0.2 M) and benzaldehyde (7.4 mmol, 2.0 equiv). This solution stirred for 5 minutes followed by the addition of potassium carbonate (3.7 mmol, 1.0 equiv). This reaction was stirred (rate of stirring should be >800 rpm) for 14 h, filtered through celite with DCM, and concentrated *in vacuo*. The resulting precipitate was dissolved in MeOH and quenched with (1.1 mmol, 0.3 equiv conc. HCl). The solvent was removed *in vacuo* and the crude residue was purified by column chromatography with 5% EtOAc/hexanes until **2b** (1.26 g, 91% yield, >20:1 dr, 95.5:4.5 er) had eluted from the column (TLC analysis). At this point the eluent was changed to 2.5% MeOH/DCM in order to recover the HCl salt of catalyst **B** (0.15 g, 74% recovery based on the HCl salt).

### General Procedure C for the Reduction of Cross Benzoin Products.

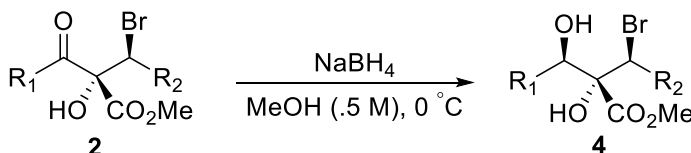

A flame dried scintillation vial was charged with cross-benzoin product **2**, diluted with MeOH (to 0.5 M), and cooled to 0 °C. NaBH<sub>4</sub> (5.0 equiv) was added and the reaction was stirred at 0 °C for 7 min, then quenched with saturated NH<sub>4</sub>Cl and diluted with Et<sub>2</sub>O (15 mL)

and H<sub>2</sub>O (10 mL). The layers were separated and the organic layer was further washed with brine (1 x 10 mL). The organic extracts were dried over MgSO<sub>4</sub>, filtered and concentrated *in vacuo*. In general no further purification was required but if necessary diols **4** could be purified by column chromatography using an eluent of 15% EtOAc/hexanes.

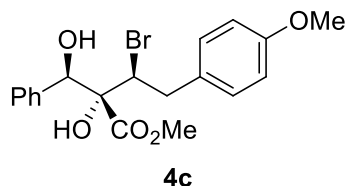

**Methyl (2S,3S)-3-bromo-2-hydroxy-2-((R)-hydroxy(phenyl)methyl)-4-(4-methoxyphenyl)butanoate**

**(4c):** The title compound was prepared according to General Procedure C using **2c** (0.030 g, 0.074 mmol), affording **4c** (0.027 g, 0.66 mmol, 91% yield, >20:1 dr) as a white solid.

Analytical data for **4c**: mp 124.5-125.5 °C; **<sup>1</sup>H NMR** (400 MHz, CDCl<sub>3</sub>): δ 7.42-7.40 (m, 2H), 7.38-7.32 (m, 3H), 7.26-7.19 (m, 2H) 6.87-6.85 (m, 2H), 5.07 (d, *J* = 7.6, Hz, 1H) 4.79 (dd, *J* = 11.4, 2.0 Hz, 1H), 3.84-3.79 (m, 4H), 3.72 (s, 3H), 3.60 (s, 1H), 3.52 (d, *J* = 14.4 Hz, 1H) 2.99 (dd, *J* = 14.4, 11.4 Hz, 1H), 2.85 (d, *J* = 8.1 Hz, 1H); **<sup>13</sup>C NMR** (150 MHz, CDCl<sub>3</sub>): δ 172.5, 158.5, 138.7, 130.31, 130.29, 128.6, 128.2, 126.7, 113.7, 75.4, 82.7, 60.8, 55.2, 53.2, 37.2; **IR** (thin film): 2927, 2866, 1738, 1514, 803, 602 cm<sup>-1</sup>; **TLC** (15% EtOAc/hexane): *R<sub>f</sub>* = 0.21; **LRMS** (ESI): Calcd. for C<sub>19</sub>H<sub>21</sub>BrO<sub>5</sub>: ([*M*+*H*]): 409.07, Found: 409.17; **SFC**: Regis RP, 15% MeOH, flow rate = 3.0 mL/min, λ = 210 nm, *t<sub>R</sub>* (major) = 5.5 min *t<sub>R</sub>* (minor) = 10.8 min, 96:4 er; [α]<sub>D</sub> = -24.8 (*c* = 0.005, DCM)

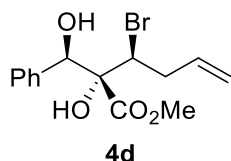

**Methyl (2S,3S)-3-bromo-2-hydroxy-2-((R)-hydroxy(phenyl)methyl)hex-5-enoate (4d):**

The title compound was prepared according to General Procedure C using **2d** (0.040 g, 0.13 mmol), affording **4d** (0.039 g, 0.13 mmol, 98% yield, >20:1 dr) as a white solid. Analytical data for **4c** mp 72.1-73.0 °C; **<sup>1</sup>H NMR** (600 MHz,

CDCl<sub>3</sub>): δ 7.38-7.30 (m, 5H), 5.92-5.85 (m, 1H), 5.19-5.15 (m, 2H) 4.99 (d, *J* = 8.4, Hz, 1H) 4.57 (dd, *J* = 10.8, 2.4 Hz, 1H), 3.73 (s, 3H), 3.55 (s, 1H), 3.55 (s, 1H), 2.91-2.86 (m, 2H), 2.66-2.60 (m, 1H); **<sup>13</sup>C NMR** (150 MHz, CDCl<sub>3</sub>): δ 172.6, 138.6, 134.9, 128.6, 128.2, 126.8, 118.0, 75.4, 82.5, 58.1, 53.2, 36.2; **IR** (thin film): 2924, 1731, 1454, 1242, 1024, 701 cm<sup>-1</sup>; **TLC** (15% EtOAc/hexane): *R<sub>f</sub>* = 0.12; **LRMS** (ESI): Calcd. for C<sub>14</sub>H<sub>17</sub>BrO<sub>4</sub>: ([*M*+NH<sub>4</sub>]): 347.22, Found: 347.22; **SFC**: Regis RP, 5% MeOH, flow rate = 3.0 mL/min, λ = 210 nm, *t<sub>R</sub>* (major) = 7.7 min *t<sub>R</sub>* (minor) = 8.7 min, 95.5:4.5 er; [α]<sub>D</sub> = -20.1 (*c* = 0.007, DCM)

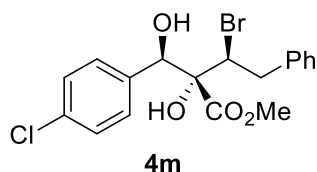

**Methyl (2S,3S)-3-bromo-2-((R)-4-chlorophenyl)-(hydroxy)methyl)-2-hydroxy-4-phenylbutanoate (4m):**

The title compound was prepared according to General Procedure C using **2m** (0.031 g, 0.075 mmol), affording **4m** (0.030 g, 0.073 mmol, 97% yield, >20:1 dr)

as a white solid. This solid was then recrystallized from 5% EtOAc/hexanes. Analytical data for **4m**: mp 149.2-150.0 °C; **<sup>1</sup>H NMR** (600 MHz, CDCl<sub>3</sub>): δ 7.38-7.26 (m, 9H), 5.06 (d, *J* = 8.2 Hz, 1H), 4.78 (dd, *J* = 11.3, 2.6 Hz, 1H), 3.72 (s, 3H), 3.64 (s, 1H), 3.58 (dd, *J* = 14.6, 2.6 Hz, 1H), 3.03 (dd, *J* = 22.4, 14.6 Hz, 1H) 2.98 (d, *J* = 8.2 Hz, 1H); **<sup>13</sup>C NMR** (150 MHz, CDCl<sub>3</sub>): δ

172.4, 138.1, 137.2, 134.5, 131.0, 129.3, 128.4, 128.2, 126.9, 82.6, 74.7, 60.0, 53.4, 38.1; **IR** (thin film): 3059, 2989, 2688, 2309, 1738, 1429, 1267  $\text{cm}^{-1}$ ; **TLC** (15% EtOAc/hexane):  $R_f$  = 0.41; **LRMS** (ESI): Calcd. for  $\text{C}_{18}\text{H}_{18}\text{BrClO}_4$ : ( $[\text{M}+\text{Na}]$ ): 435.00, Found: 435.09; **SFC**: Regis RP, 15% MeOH, flow rate = 3.0 mL/min,  $\lambda$  = 210 nm,  $t_{\text{R (major)}}$  = 4.4 min  $t_{\text{R (minor)}}$  = 8.2 min, 98:2 er (>99.9:0.1 recrystallized);  $[\alpha]_{\text{D}}$  = -56.3 ( $c$  = 0.004, DCM)

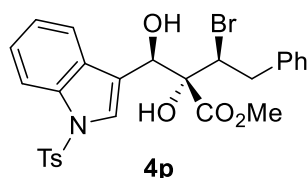

**Methyl (2S,3S)-3-bromo-2-hydroxy-2-((R)-hydroxy(1-tosyl-1H-indol-3-yl)methyl)-4-phenylbutanoate (4p)**: The title compound was prepared according to General Procedure C using **2p** affording **4p** (0.074 g, 0.13 mmol, 65% yield, 10:1 dr) as a white solid. Analytical data for **4p**: mp 74.8-75.2  $^{\circ}\text{C}$ ;  **$^1\text{H}$  NMR** (600 MHz,  $\text{CDCl}_3$ ):  $\delta$  7.97 (d,  $J$  = 7.8 Hz, 1H), 7.81 (d,  $J$  = 7.8 Hz, 1H), 7.73-7.68 (m, 3H), 7.35-7.25 (m, 7H), 7.18 (d,  $J$  = 7.8 Hz, 2H), 5.42-5.41 (m, 1H), 4.71 (d,  $J$  = 10.8 Hz, 1H), 3.83 (s, 1H), 3.77 (s, 3H), 3.56 (d,  $J$  = 14.4 Hz, 1H), 3.02-2.97 (m, 1H) 2.33 (s, 3H);  **$^{13}\text{C}$  NMR** (150 MHz,  $\text{CDCl}_3$ ):  $\delta$  172.8, 145.1, 138.0, 135.0, 134.9, 129.9, 128.4, 126.9, 126.8, 126.7, 125.1, 124.3, 123.3, 121.4, 121.1, 113.5, 83.0, 74.7, 69.7, 59.4, 53.4, 38.3, 21.5; **IR** (thin film): 3059, 2989, 2306, 1738, 1429, 1267, 896  $\text{cm}^{-1}$ ; **TLC** (15% EtOAc/hexane):  $R_f$  = 0.21; **LRMS** (ESI): Calcd. for  $\text{C}_{27}\text{H}_{26}\text{BrNO}_6\text{S}$ : ( $[\text{M}+\text{Na}]$ ): 594.06, Found: 594.06; **4p** could not be directly analyzed via SFC, see compound **5** for enantiomeric analysis;  $[\alpha]_{\text{D}}$  = -24.8 ( $c$  = 0.007, DCM)

#### Synthesis of the Mosher ester of 2p

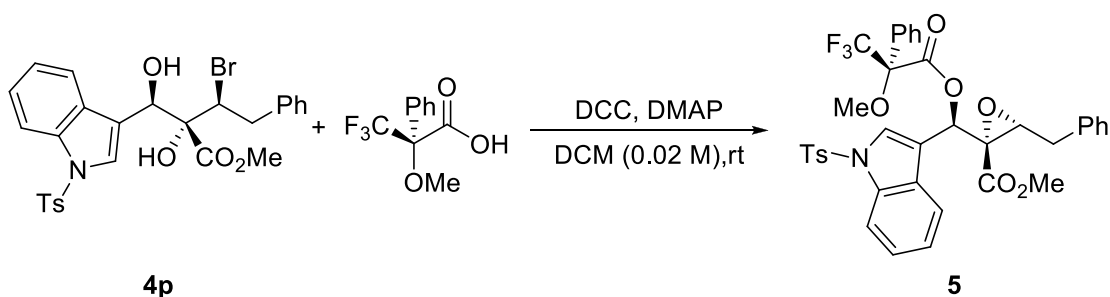

A flame dried scintillation vial was loaded with cross-benzoin diol **4p** (0.035 mmol, 1.0 equiv), (R)-  $\alpha$ -methoxy-  $\alpha$ -trifluoromethylphenylacetic acid (0.042 mmol, 1.2 equiv) and DCM (2.0 mL, 0.02 M). To this was added *N,N*-dicyclohexylcarboimide (0.07 mmol, 2.0 equiv) and 4-dimethylaminopyridine (0.035 mmol, 1.0 equiv) This reaction mixture was stirred at rt for 18 h then filtered through celite. The filtrate was then diluted with 1M HCl (10 mL) and EtOAc (10 mL). The layers were separated and the organic layer was further washed with 1 M NaOH (2 x 10 mL) and brine (1 x 10 mL). The organic extracts were dried over  $\text{MgSO}_4$ , filtered and concentrated *in vacuo*. The reaction mixture was purified by column chromatography using an eluent of 10% EtOAc/hexanes providing **5** as a colorless oil (22 mg, 0.031 mmol, 89% yield, 98:2 er).



Analytical data for **(2S,3R)-methyl 3-benzyl-2-((R)-(1-tosyl-1H-indol-3-yl)((R)-3,3,3-trifluoro-2-methoxy-2-phenylpropanoyloxy)methyl)oxirane-2-carboxylate (5)**: <sup>1</sup>H NMR (600 MHz, CDCl<sub>3</sub>): δ 7.88 (d, *J* = 8.4 Hz, 1H), 7.63 (d, *J* = 8.4 Hz, 2H), 7.57 (s, 1H), 7.40-7.39 (d, *J* = 7.8 Hz, 1H), 7.28-7.21 (m, 4H), 7.09-7.00 (m, 9H), 6.96 (s, 1H), 3.82 (s, 3H), 3.42 (s, 3H), 2.90-2.86 (m, 1H), 2.76-2.72 (m, 2H) 2.25 (s, 3H); <sup>13</sup>C NMR (150 MHz, CDCl<sub>3</sub>): δ 167.8, 165.3, 145.2, 135.6, 134.7, 134.5, 131.3, 129.8, 129.5, 128.8, 128.7, 128.4, 128.0, 127.5, 127.1, 126.9, 126.7, 125.0, 123.6, 121.0, 114.2, 113.4, 71.0, 63.2, 60.3, 55.5, 52.9, 33.9, 29.7 21.5 (two coincident peaks); <sup>19</sup>F NMR (376 MHz, CDCl<sub>3</sub>): δ<sub>major</sub> 71.85 δ<sub>minor</sub> 71.6, 98:2 er; IR (thin film): 3059, 2989, 2306, 1738, 1429, 1267, 896 cm<sup>-1</sup>; TLC (15% EtOAc/hexane): R<sub>f</sub> = 0.21; LRMS (ESI): Calcd. for C<sub>37</sub>H<sub>32</sub>NO<sub>8</sub>S: ([M+Na]): 730.17, Found: 730.31; [α]<sub>D</sub> = 39.0 (*c* = 0.007, DCM).

#### References:

- (1) Vora, H. U.; Lathorp, H. P.; Reynolds, N. T.; Kerr, M. S.; Read de Alaniz, J.; Rovis, T. *Org Synth.* **2010**, 87, 350-361.
- (2) Kobayashi, S.; Kinoshita, T.; Uehara, H.; Sudo, T.; Ryu, I. *Org. Lett.* **2009**, 11, 3934-3937.
- (3) Thai, K.; Langdon, S. M.; Bilodeau, F.; Gravel, M. *Org. Lett.*, **2013**, 15, 2214-2217.
- (4) Massey, R. S.; Collett, C. J.; Lindsay, A. G.; Smith, A. D.; O'Donoghue, A. C. *J. Am. Chem. Soc.* **2012**, 134, 20421-20432.
- (5) Saifina, D. F.; Ganieva, V. R.; Mamedov, V. A. *Russ. J. Org. Chem.* **2009**, 45, 1244-1247
- (6) Yang, L.; Deng, G.; Wang, D-X.; Huang, Z-T.; Zhu, J-P.; Wang, M-X. *Org. Lett.* **2007**, 9, 1387-1390
- (7) Steward, K. M.; Corbett, M. T.; Goodman, C. G.; Johnson, J. S. *J. Am. Chem. Soc.* **2012**, 134, 20197 –20206.
- (8) Rothman, J. H.; *J. Org. Chem.* **2009**, 74, 925-928.
- (9) Cornwall C.; Dell, C. P.; Knight D. W.; *J. Chem. Soc.* **1991**, 2417-2428.
- (10) Nagasaki, A.; Adachi, Y.; Yonezawa, Y.; Shin, C-G. *Heterocycles*, **2003**, 60, 331-335
- (11) Medine, J. R.; Becker, C. J.; Blackledge, C. W.; Duquenne, C.; Feng, Y.; Grant, S. W.; Heering, D.; Li, W. H.; Miller, W. H.; Romeril, S. P.; Scherzer, D.; Shu, A.; Bobko, M. A.; Chadderton, A. R.; Dumble, M.; Gardiner, C. M.; Gilbert, S.; Liu, Q.; Rabindran, S. K.; Sudakin, V.; Xiang, H.; Brady, P. G.; Campobasso, N.; Ward, P.; Axten, J. M. *J. Med. Chem.* **2011**, 54, 1871-1895.
- (12) Ling, K. B.; Smith, A. D. *Chem. Commun.* **2011**, 47, 373-375

## SFC and HPLC traces

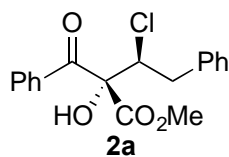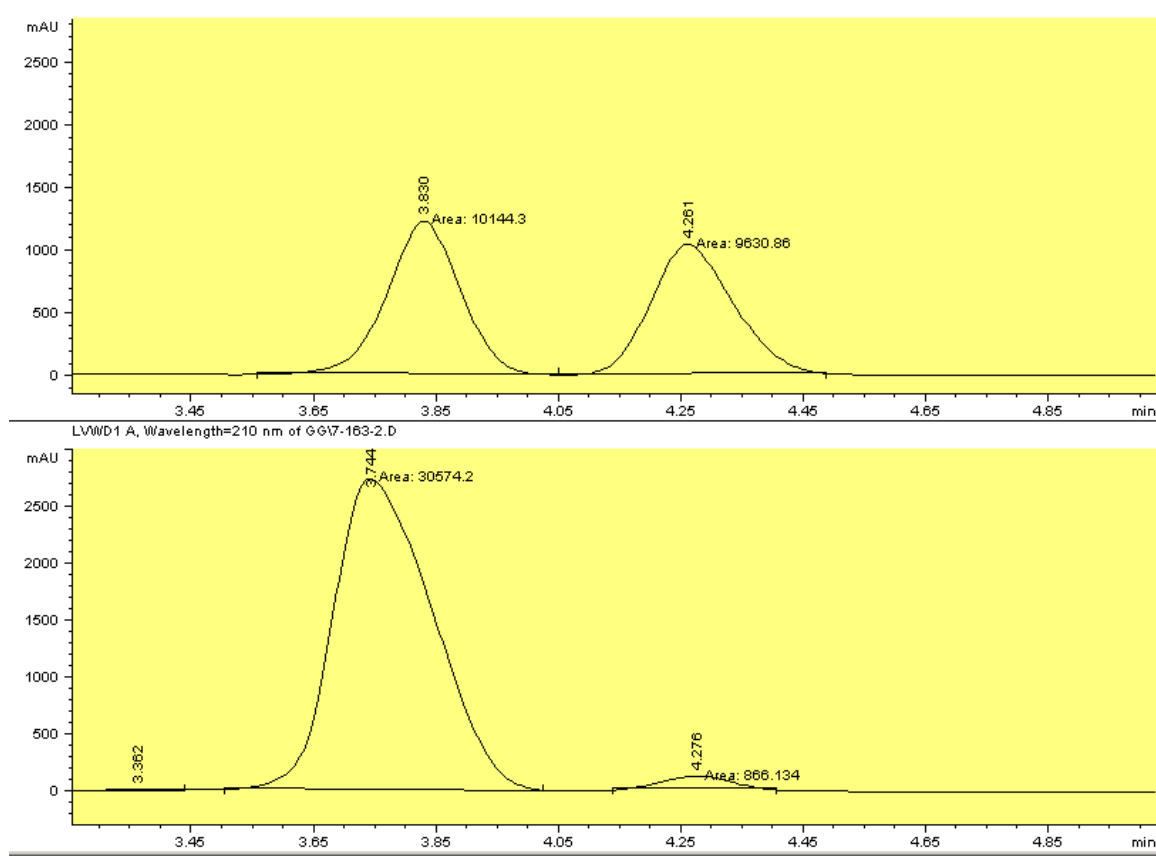

signal 1: LVWD1 A, wavelength=210 nm

| Peak #   | RT [min] | Type | width [min] | Area [mAU*sec] | Height [mAU] | Area %  |
|----------|----------|------|-------------|----------------|--------------|---------|
| 1        | 3.744    | MM   | 0.189       | 31127.66406    | 2745.94067   | 96.3080 |
| 2        | 4.276    | MM   | 0.147       | 1193.30249     | 135.02567    | 3.6920  |
| Totals : |          |      |             | 32320.96680    | 2880.96631   |         |

\*\*\* End of Report \*\*\*

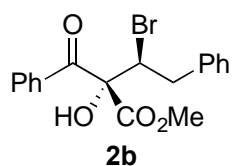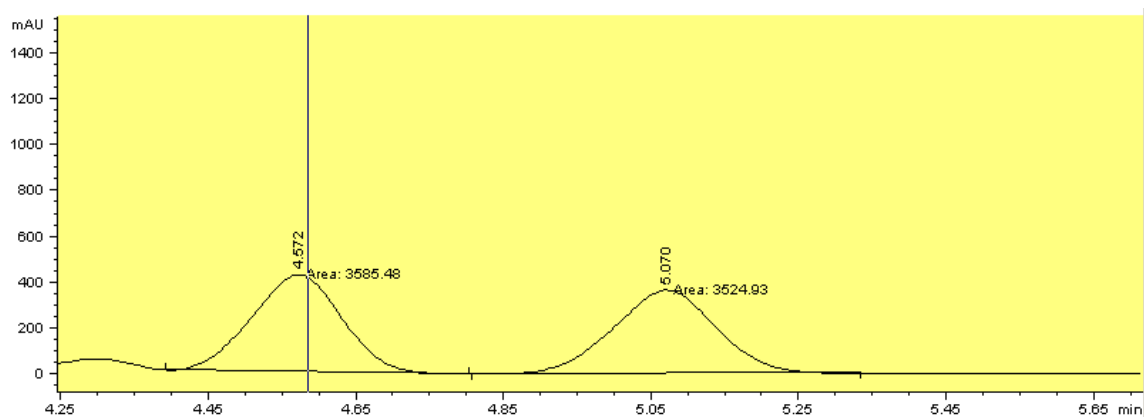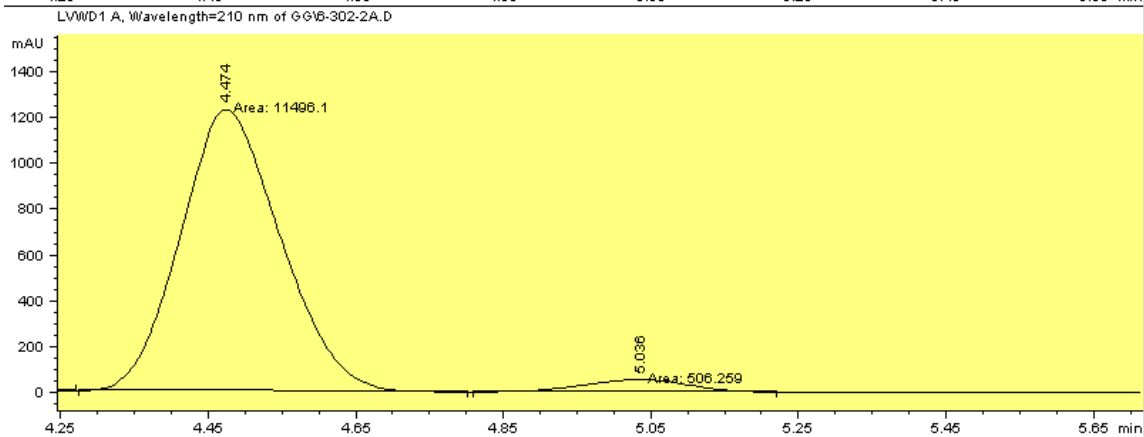

signal 1: LVWD1 A, wavelength=210 nm

| Peak #   | RT [min] | Type | width [min] | Area [mAU*sec] | Height [mAU] | Area %  |
|----------|----------|------|-------------|----------------|--------------|---------|
| 1        | 3.744    | MM   | 0.189       | 31127.66406    | 2745.94067   | 96.3080 |
| 2        | 4.276    | MM   | 0.147       | 1193.30249     | 135.02567    | 3.6920  |
| Totals : |          |      |             | 32320.96680    | 2880.96631   |         |

\*\*\* End of Report \*\*\*

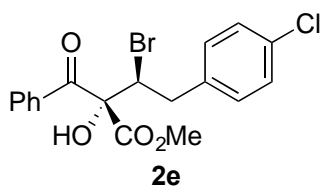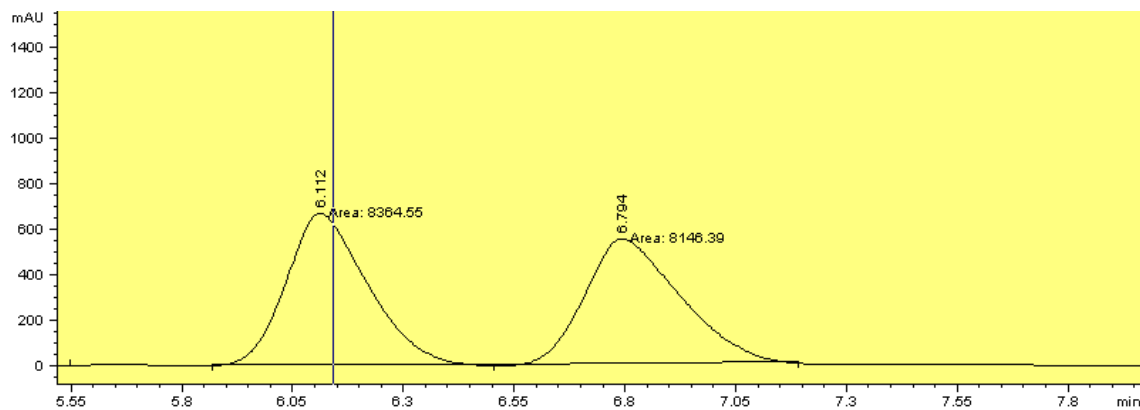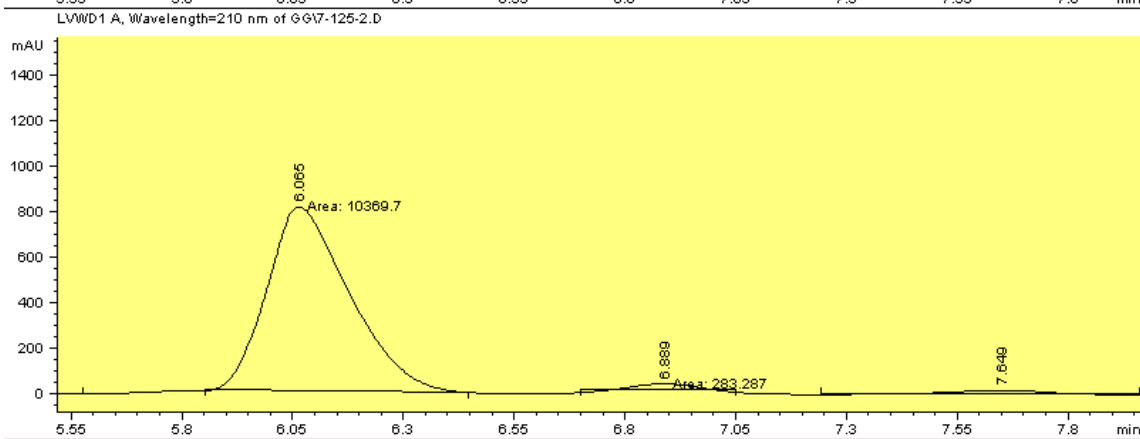

Signal 1: LVWD1 A, wavelength=210 nm

| Peak #   | RT [min] | Type | width [min] | Area [mAU*sec] | Height [mAU] | Area %  |
|----------|----------|------|-------------|----------------|--------------|---------|
| 1        | 6.065    | MM   | 0.223       | 10944.87598    | 819.77118    | 94.9026 |
| 2        | 6.888    | MM   | 0.221       | 587.86420      | 44.27318     | 5.0974  |
| Totals : |          |      |             | 11532.74023    | 864.04437    |         |

\*\*\* End of Report \*\*\*

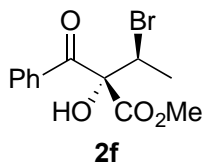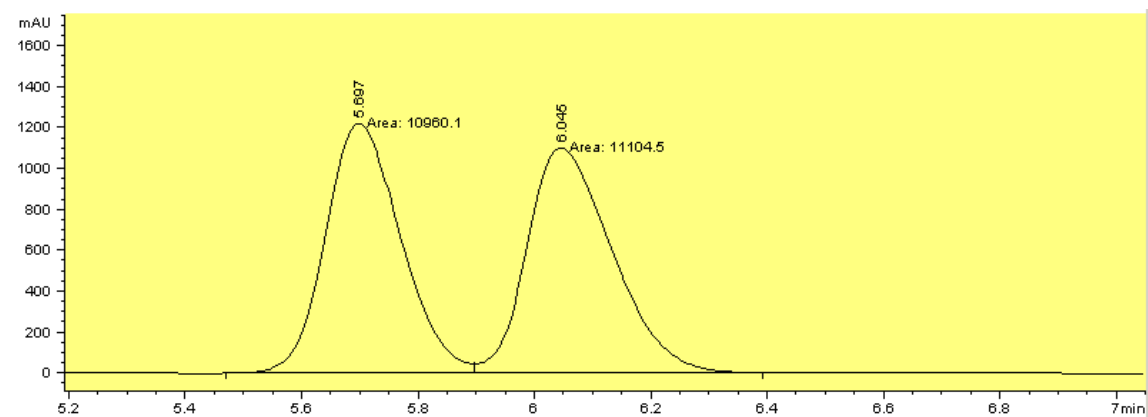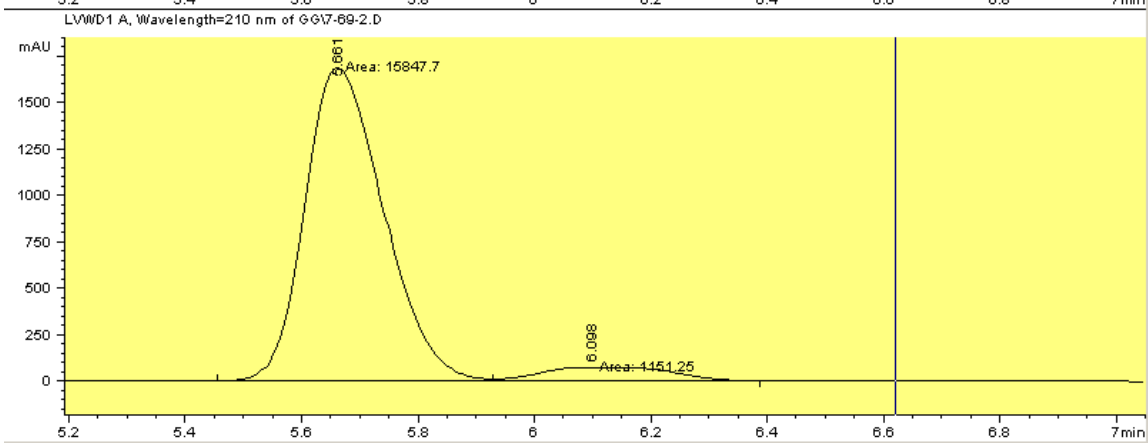

signal 1: LVWD1 A, wavelength=210 nm

| Peak #   | RT [min] | Type | width [min] | Area [mAU*sec] | Height [mAU] | Area %  |
|----------|----------|------|-------------|----------------|--------------|---------|
| 1        | 5.661    | MF   | 0.156       | 15865.81836    | 1695.28894   | 93.0649 |
| 2        | 6.097    | FM   | 0.262       | 1182.31006     | 75.20283     | 6.9351  |
| Totals : |          |      |             | 17048.12891    | 1770.49182   |         |

\*\*\* End of Report \*\*\*

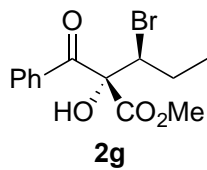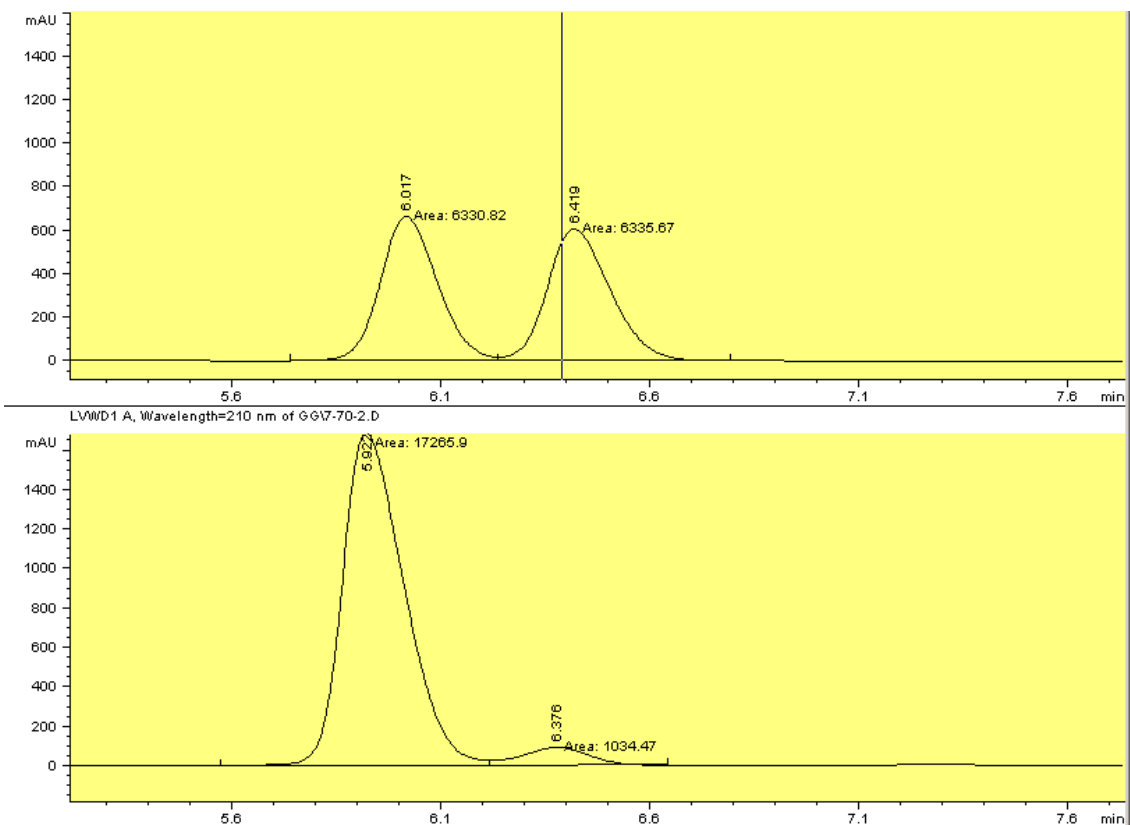

Signal 1: LVWD1 A, wavelength=210 nm

| Peak #   | RT [min] | Type | Width [min] | Area [mAU*sec] | Height [mAU] | Area %  |
|----------|----------|------|-------------|----------------|--------------|---------|
| 1        | 5.921    | MF   | 0.169       | 17286.55859    | 1702.33911   | 94.0402 |
| 2        | 6.376    | FM   | 0.195       | 1095.52734     | 93.69172     | 5.9598  |
| Totals : |          |      |             | 18382.08594    | 1796.03088   |         |

\*\*\* End of Report \*\*\*

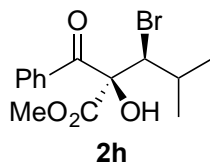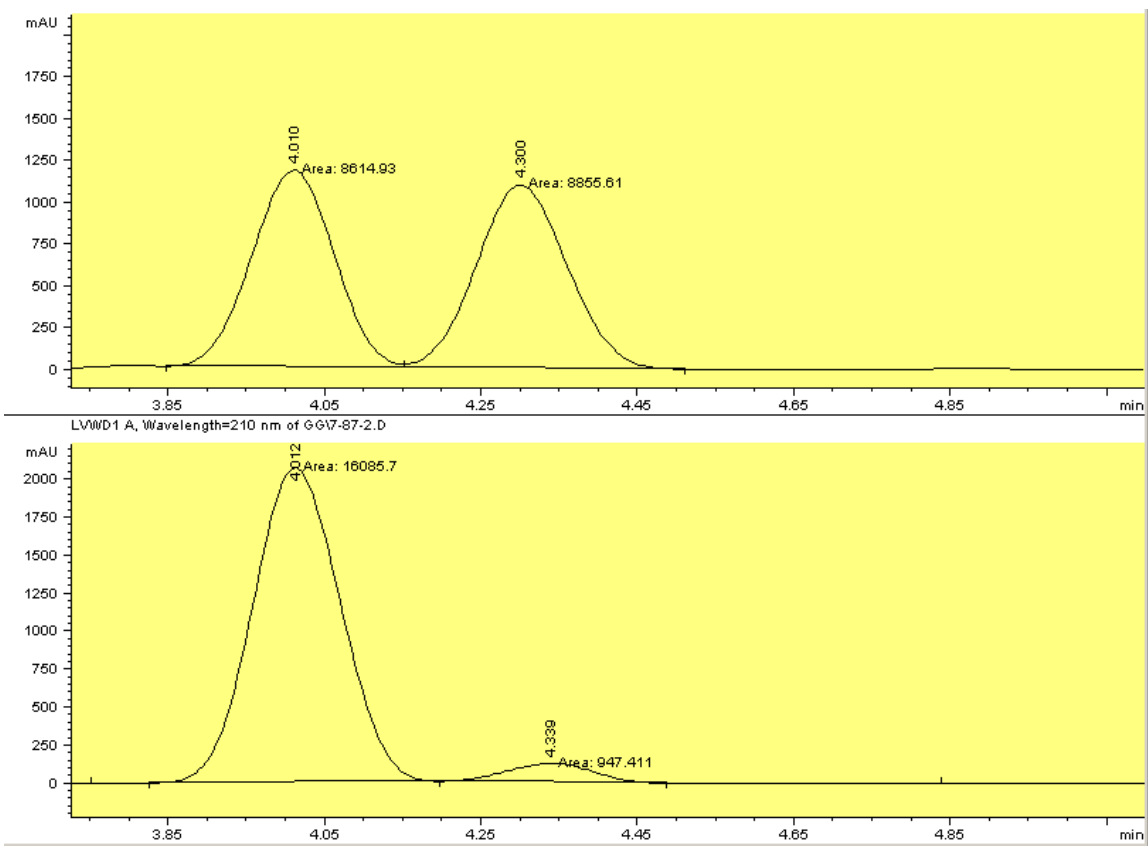

Signal 1: LVWD1 A, Wavelength=210 nm

| Peak #   | RT [min] | Type | Width [min] | Area [mAU*sec] | Height [mAU] | Area %  |
|----------|----------|------|-------------|----------------|--------------|---------|
| 1        | 4.012    | MF   | 0.130       | 16241.34668    | 2086.26978   | 93.7932 |
| 2        | 4.339    | FM   | 0.136       | 1074.78687     | 132.16475    | 6.2069  |
| Totals : |          |      |             | 17316.13281    | 2218.43457   |         |

\*\*\* End of Report \*\*\*

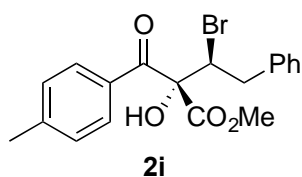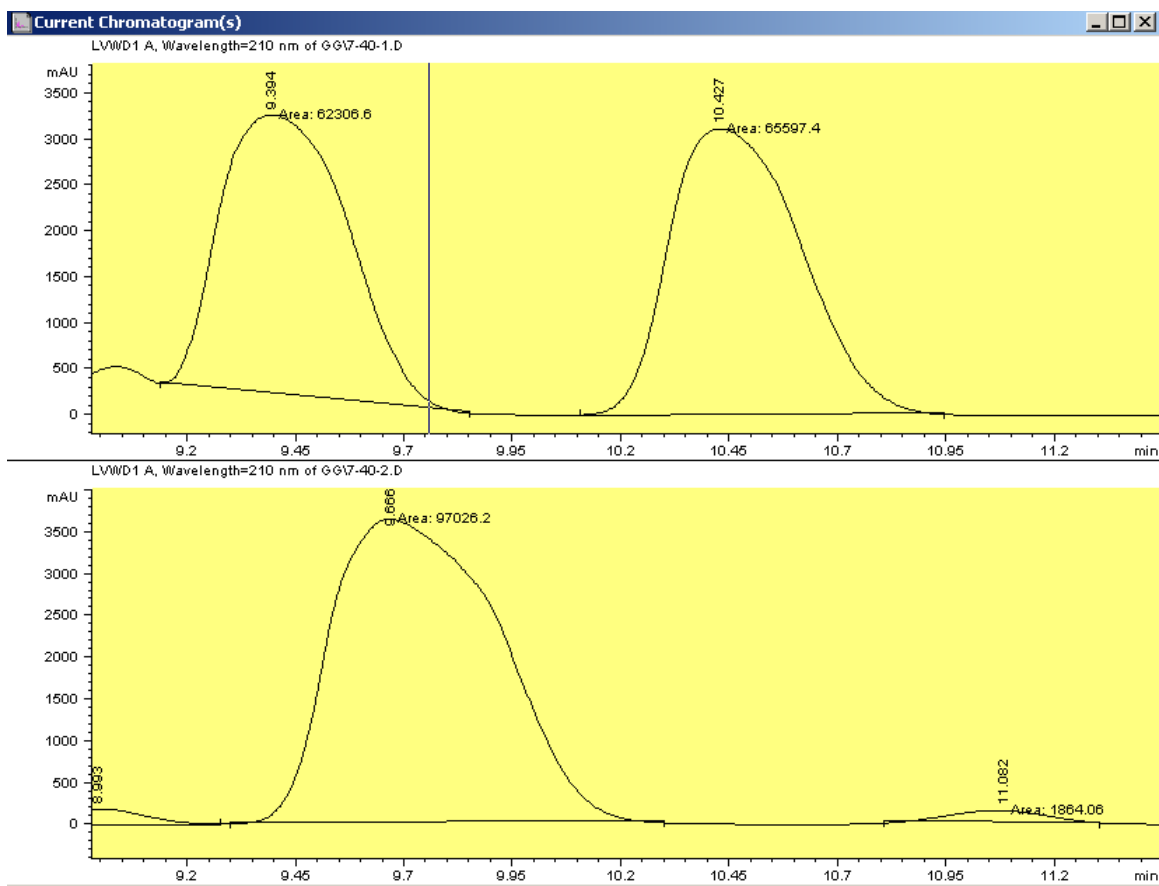

Signal 1: LVWD1 A, wavelength=210 nm

| Peak #   | RT [min] | Type | Width [min] | Area [mAU*sec] | Height [mAU] | Area %  |
|----------|----------|------|-------------|----------------|--------------|---------|
| 1        | 9.666    | MM   | 0.450       | 98423.57813    | 3647.09424   | 97.0284 |
| 2        | 11.070   | MM   | 0.302       | 3014.31030     | 166.53088    | 2.9716  |
| Totals : |          |      |             | 101437.89062   | 3813.62500   |         |

\*\*\* End of Report \*\*\*



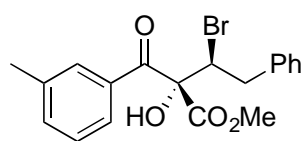

2j

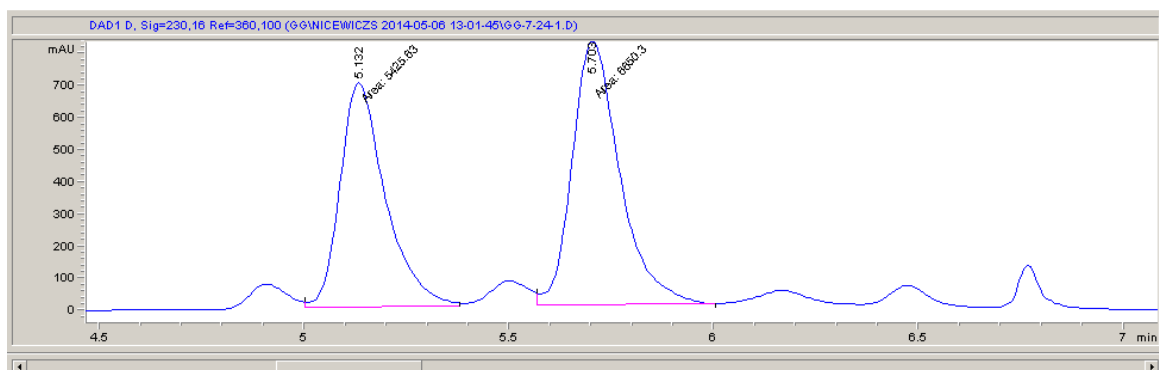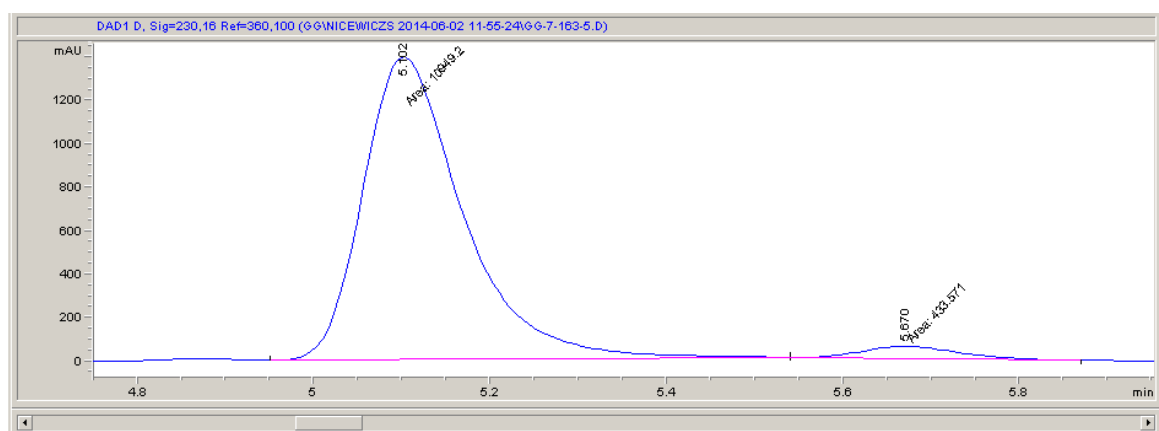

| # | Time  | Area    | Height | Width  | Area%  | Symmetry |
|---|-------|---------|--------|--------|--------|----------|
| 1 | 5.102 | 10949.2 | 1393.8 | 0.1309 | 96.191 | 0.662    |
| 2 | 5.67  | 433.6   | 56.4   | 0.1282 | 3.809  | 0.787    |

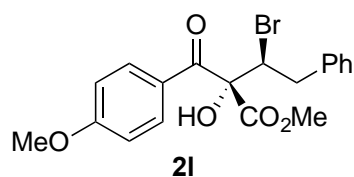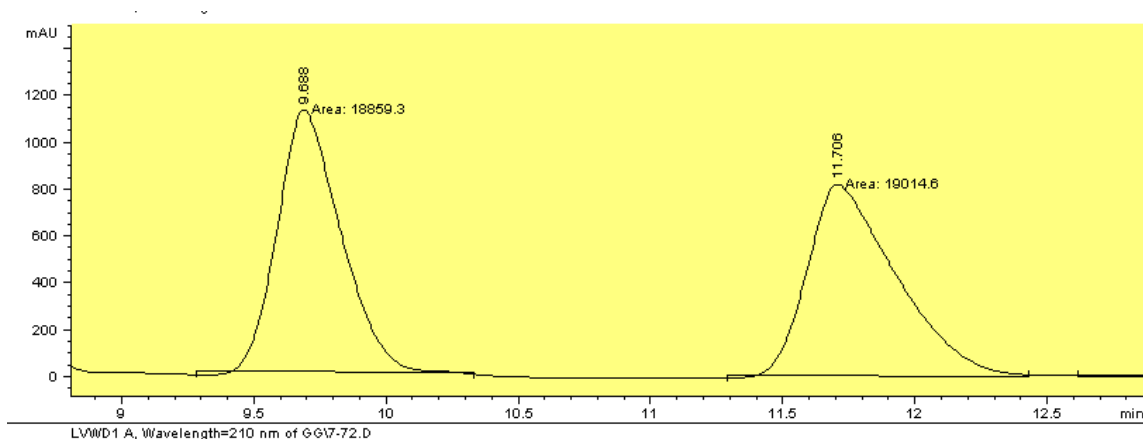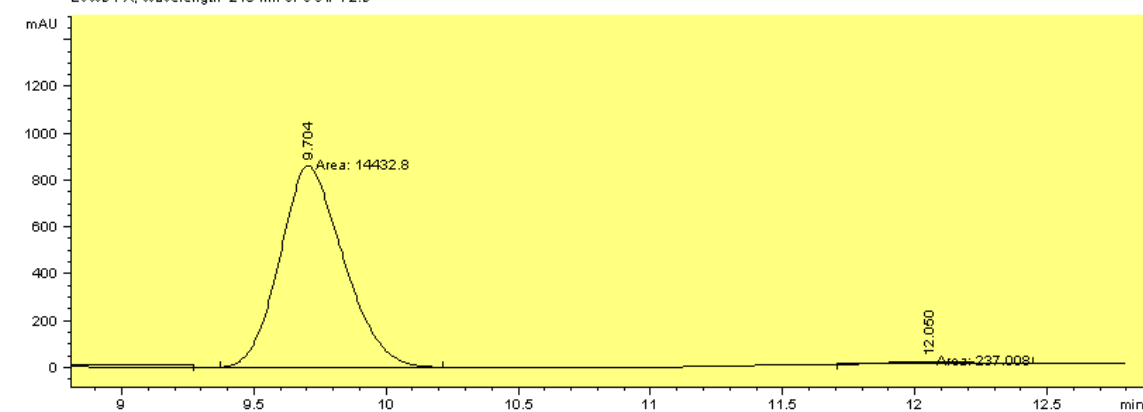

signal 1: LVWD1 A, wavelength=210 nm

| Peak #   | RT [min] | Type | width [min] | Area [mAU*sec] | Height [mAU] | Area %  |
|----------|----------|------|-------------|----------------|--------------|---------|
| 1        | 9.704    | MM   | 0.279       | 14473.55078    | 865.08984    | 97.8602 |
| 2        | 12.050   | MM   | 0.377       | 316.48083      | 13.99325     | 2.1398  |
| Totals : |          |      |             | 14790.03125    | 879.08307    |         |

\*\*\* End of Report \*\*\*

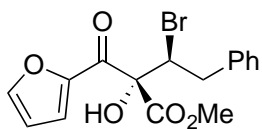

**2n**

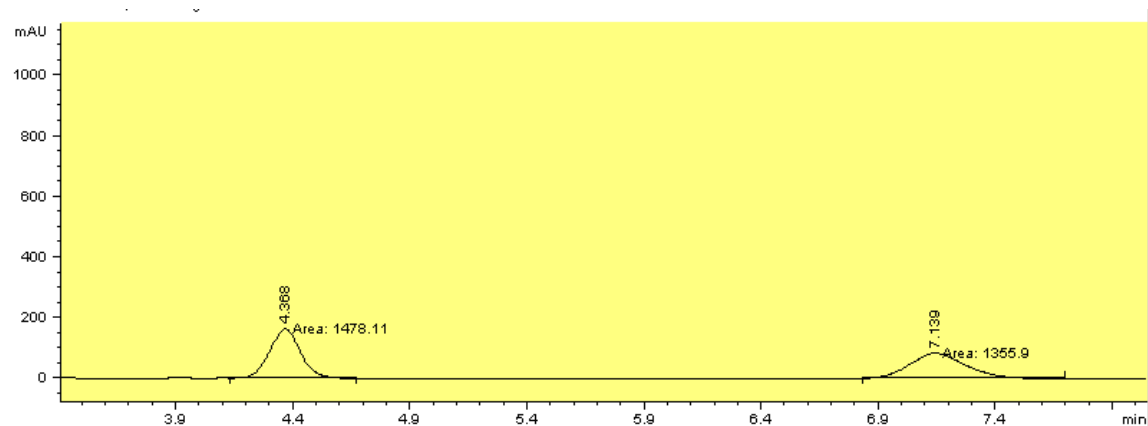

LVWD1 A, Wavelength=210 nm of GG17-88-2.D

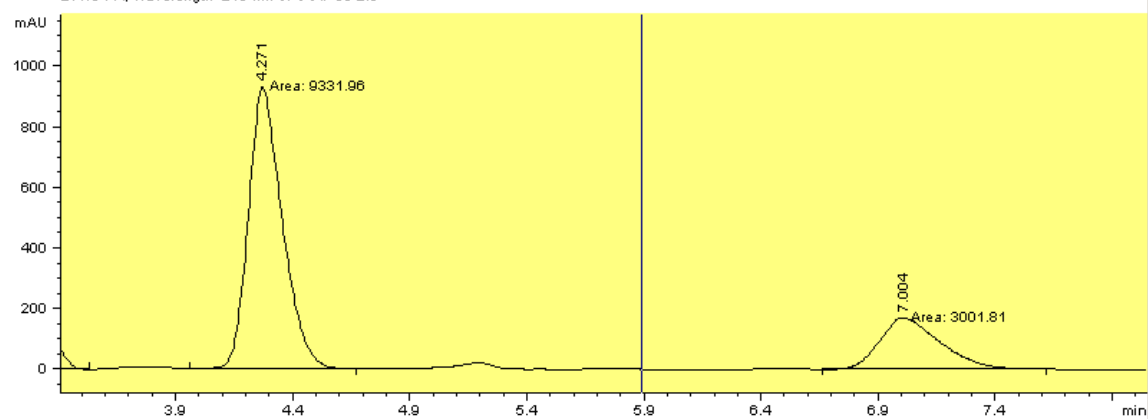

signal 1: LVWD1 A, wavelength=210 nm

| Peak #   | RT [min] | Type | width [min] | Area [mAU*sec] | Height [mAU] | Area %  |
|----------|----------|------|-------------|----------------|--------------|---------|
| 1        | 4.271    | MM   | 0.166       | 9333.30957     | 935.76410    | 75.5034 |
| 2        | 7.004    | FM   | 0.297       | 3028.13525     | 170.21275    | 24.4966 |
| Totals : |          |      |             | 12361.44531    | 1105.97681   |         |

\*\*\* End of Report \*\*\*

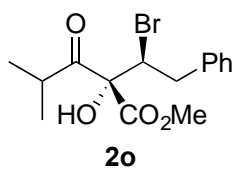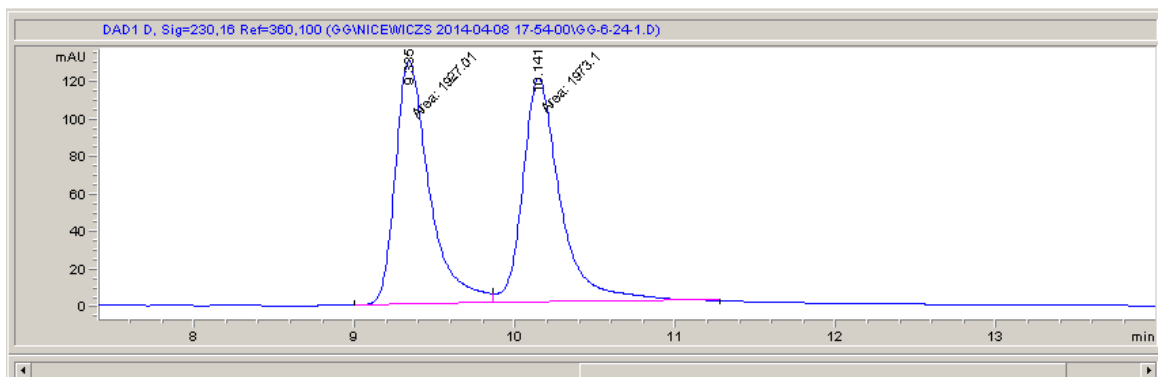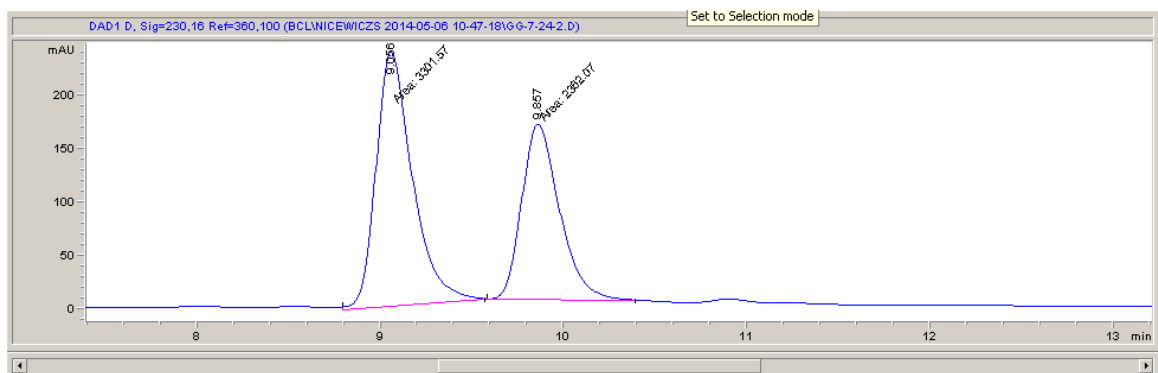

| # | Time  | Area   | Height | Width  | Area%  | Symmetry |
|---|-------|--------|--------|--------|--------|----------|
| 1 | 9.056 | 3301.6 | 239    | 0.2303 | 58.294 | 0.674    |
| 2 | 9.857 | 2362.1 | 164.9  | 0.2387 | 41.706 | 0.719    |

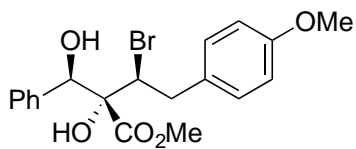

**4c**

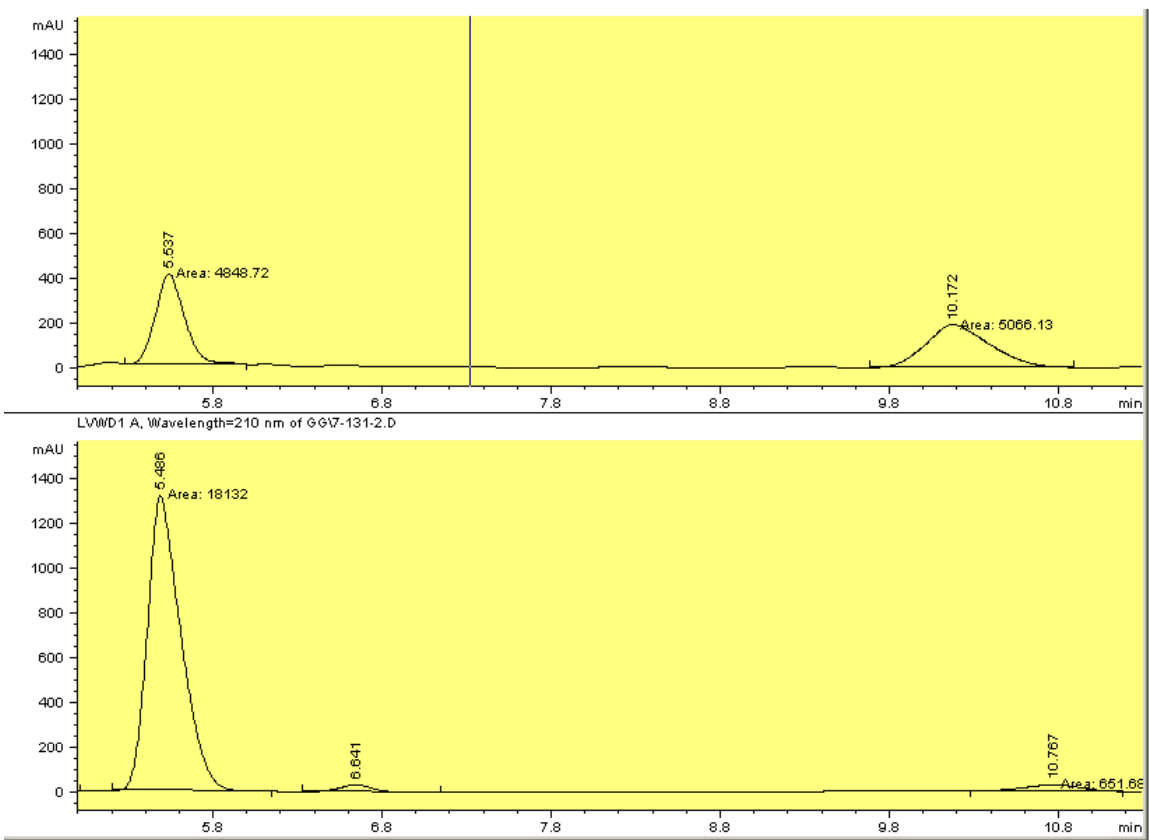

Signal 1: LVWD1 A, wavelength=210 nm

| Peak #   | RT [min] | Type | Width [min] | Area [mAU*sec] | Height [mAU] | Area %  |
|----------|----------|------|-------------|----------------|--------------|---------|
| 1        | 5.485    | MM   | 0.230       | 18337.21484    | 1326.79773   | 96.0879 |
| 2        | 10.767   | MM   | 0.416       | 746.57886      | 29.89055     | 3.9121  |
| Totals : |          |      |             | 19083.79297    | 1356.68823   |         |

\*\*\* End of Report \*\*\*

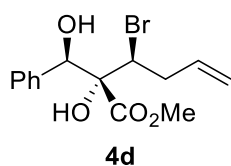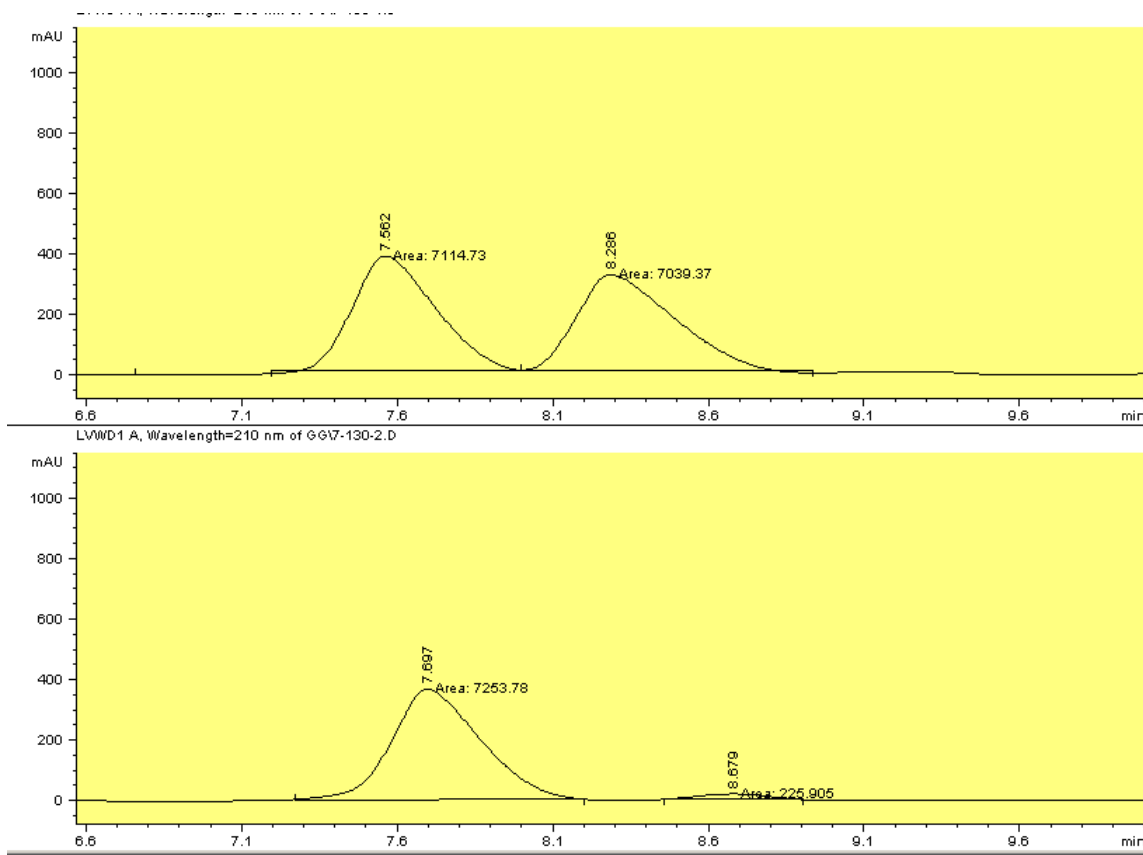

Signal 1: LVWD1 A, wavelength=210 nm

| Peak #   | RT [min] | Type | Width [min] | Area [mAU*sec] | Height [mAU] | Area %  |
|----------|----------|------|-------------|----------------|--------------|---------|
| 1        | 7.697    | MF   | 0.340       | 7553.62842     | 370.17178    | 94.5033 |
| 2        | 8.679    | FM   | 0.311       | 439.34650      | 23.54018     | 5.4967  |
| Totals : |          |      |             | 7992.97510     | 393.71198    |         |

\*\*\* End of Report \*\*\*

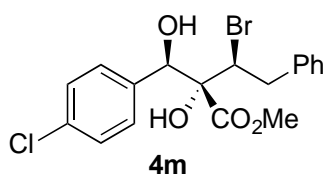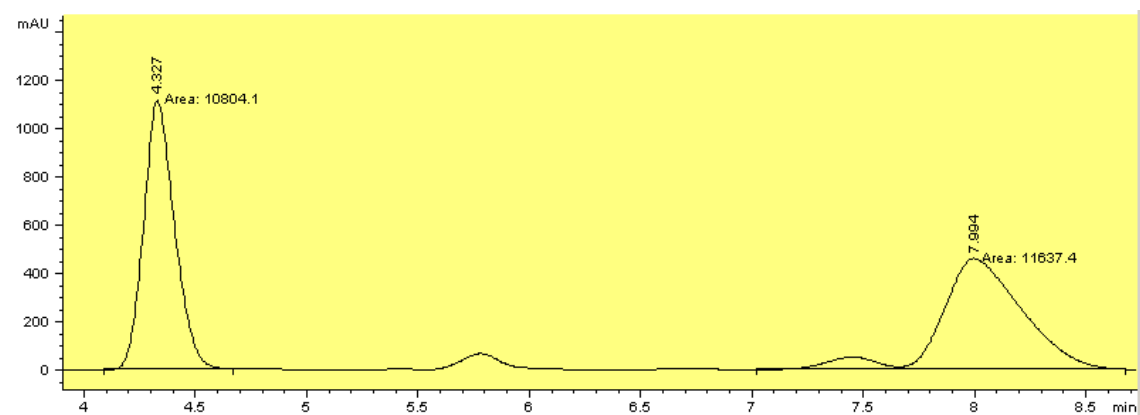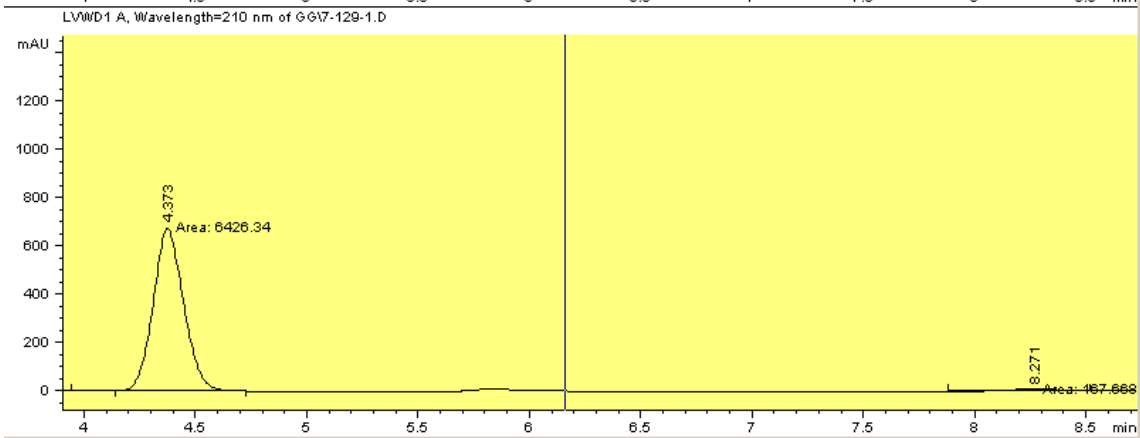

| Peak #   | RT [min] | Type | width [min] | Area [mAU*sec] | Height [mAU] | Area %  |
|----------|----------|------|-------------|----------------|--------------|---------|
| 1        | 4.373    | MM   | 0.159       | 6445.78369     | 677.54773    | 97.7366 |
| 2        | 8.271    | MM   | 0.287       | 149.27110      | 8.67632      | 2.2634  |
| Totals : |          |      |             | 6595.05469     | 686.22406    |         |

\*\*\* End of Report \*\*\*

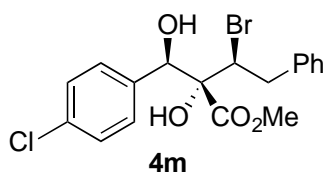

Recrystallized:

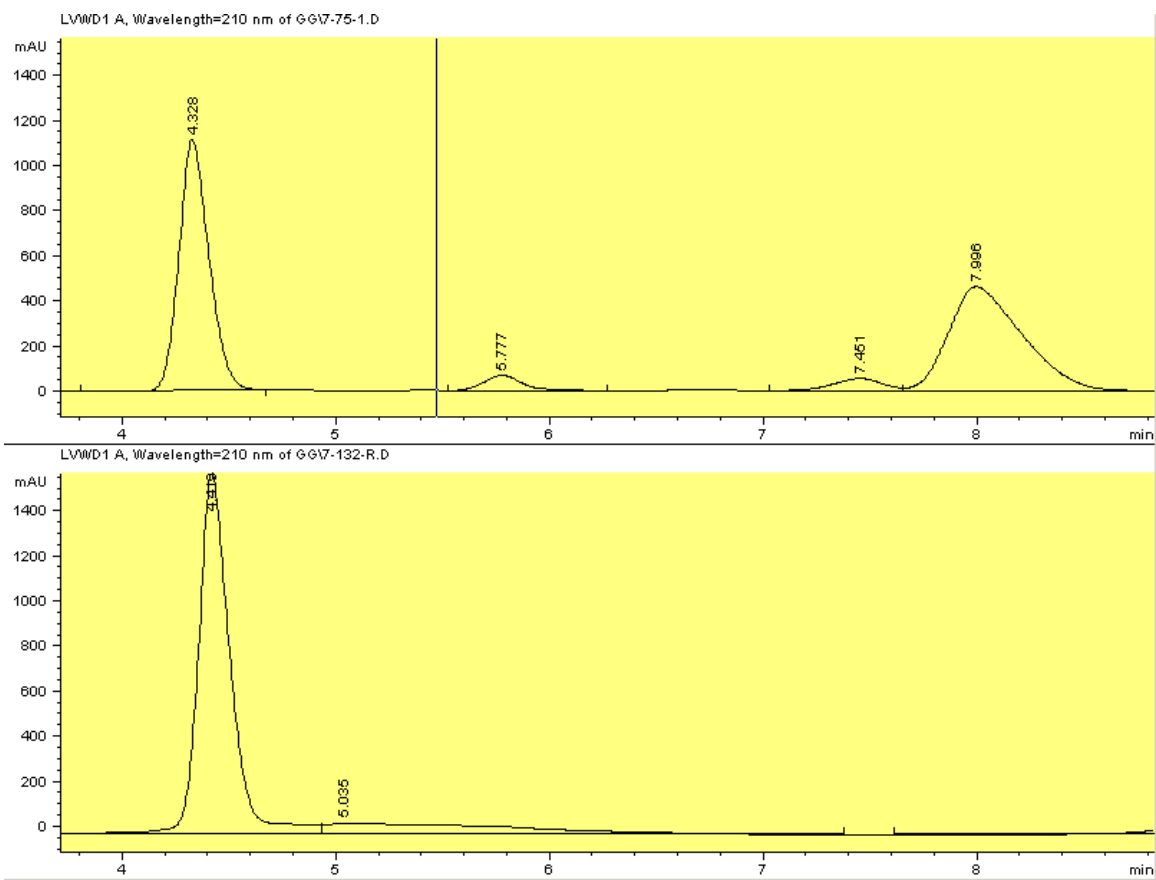



# <sup>1</sup>H, <sup>13</sup>C <sup>19</sup>F, NMR Spectra

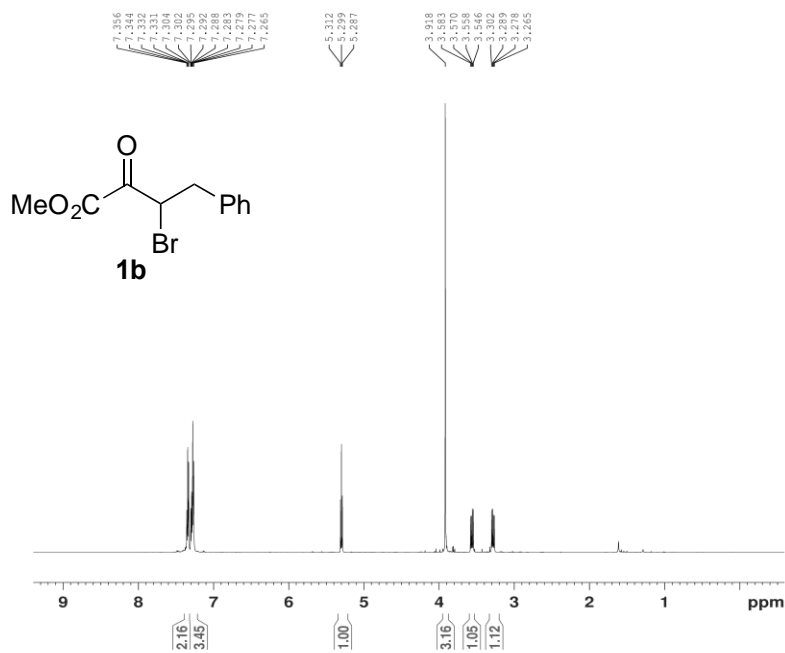

```

Current Data Parameters
NAME      GG-7-159
EXPNO     1
PROCNO    1

F2 - Acquisition Parameters
Date_     20140613
Time      8.06
INSTRUM   spect
PROBHD    5 mm CPQCI 1H/
PULPROG   zg30
TD         65536
SOLVENT   CDCl3
NS         9
DS         0
SWH        12019.230 MHz
FIDRES     0.183399 Hz
AQ         2.7262976 sec
RG         12.7
DW         41.600 nsec
DE         10.00 nsec
TE         298.2 K
D1         1.00000000 sec
D11        1
TD0        1

===== CHANNEL f1 =====
SFO1      600.1337060 MHz
NUC1      1H
P1        11.00 nsec
PLW1      13.00000000 W

F2 - Processing parameters
SI         65536
SF         600.1300000 MHz
WDW        EM
SSB        0
LB         0.30 Hz
GB         0
PC         1.00
    
```

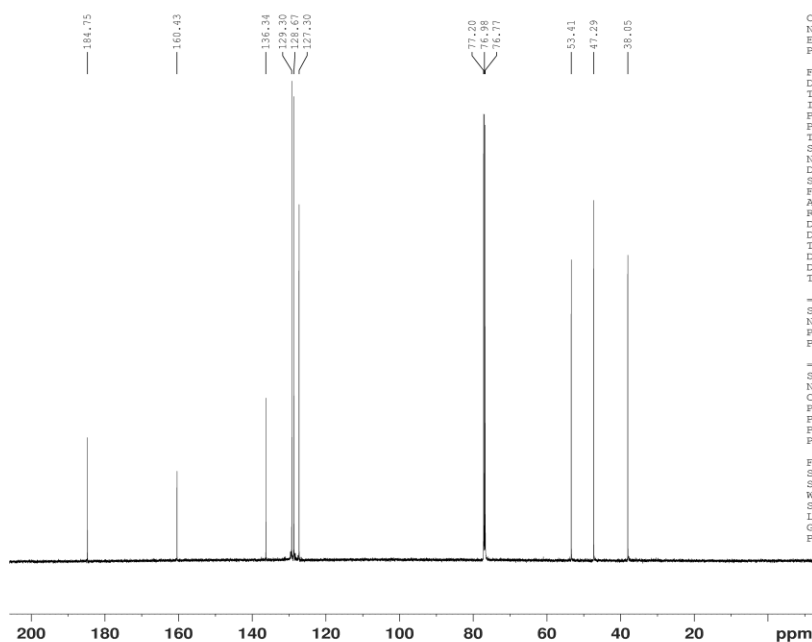

```

Current Data Parameters
NAME      GG-7-159-c13
EXPNO     2
PROCNO    1

F2 - Acquisition Parameters
Date_     20140613
Time      1.08
INSTRUM   spect
PROBHD    5 mm CPQCI 1H/
PULPROG   zgpg30
TD         65536
SOLVENT   CDCl3
NS         128
DS         4
SWH        36057.691 MHz
FIDRES     0.550197 Hz
AQ         0.9087659 sec
RG         203
DW         13.867 usec
DE         18.00 usec
TE         298.2 K
D1         2.00000000 sec
D11        0.03000000 sec
TD0        1

===== CHANNEL f1 =====
SFO1      150.9178981 MHz
NUC1      13C
P1        11.35 usec
PLW1      230.00000000 W

===== CHANNEL f2 =====
SFO2      600.1324005 MHz
NUC2      1H
CPDPRG2   waltz16
PCPD2     90.00 usec
PLW2      13.00000000 W
PLW12     0.19774000 W
PLW13     0.16017000 W

F2 - Processing parameters
SI         32768
SF         150.9028217 MHz
WDW        EM
SSB        0
LB         1.00 Hz
GB         0
PC         1.40
    
```

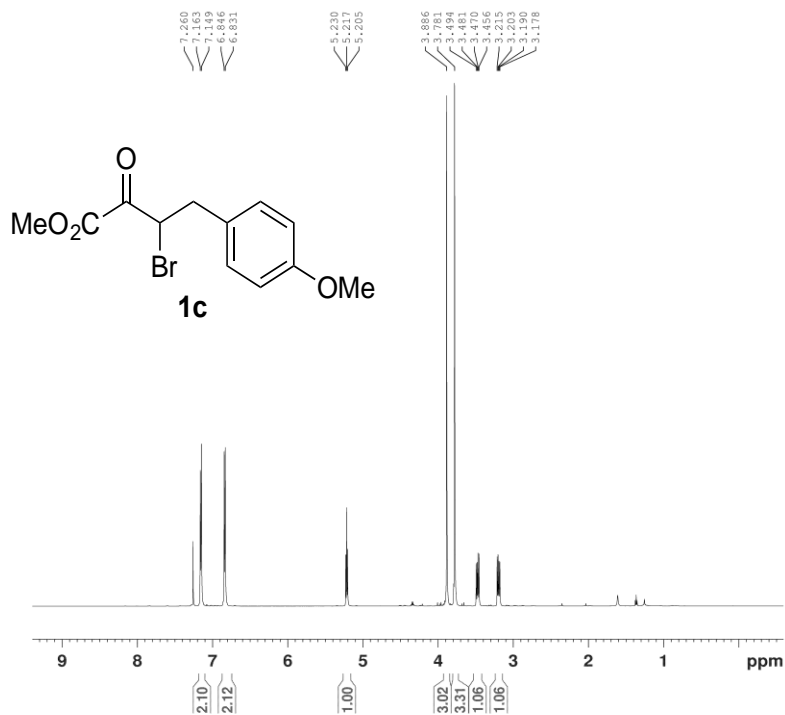

Current Data Parameters  
NAME GG-7-115  
EXPNO 1  
PROCNO 1

F2 - Acquisition Parameters  
Date\_ 20140613  
Time 8.04  
INSTRUM spect  
PROBHD 5 mm CPQCI 1H/  
PULPROG zg30  
TD 65536  
SOLVENT CDC13  
NS 16  
DS 0  
SWH 12019.230 MHz  
FIDRES 0.183399 Hz  
AQ 2.7262976 sec  
RG 12.7  
DW 41.600 usec  
DE 10.00 usec  
TE 298.2 K  
D1 1.00000000 sec  
TD0 1

===== CHANNEL f1 =====  
SFO1 600.1337060 MHz  
NUC1 1H  
P1 11.00 usec  
PLW1 13.00000000 W

F2 - Processing parameters  
SI 65536  
SF 600.1300145 MHz  
WDW EM  
SSB 0  
LB 0.30 Hz  
GB 0  
PC 1.00

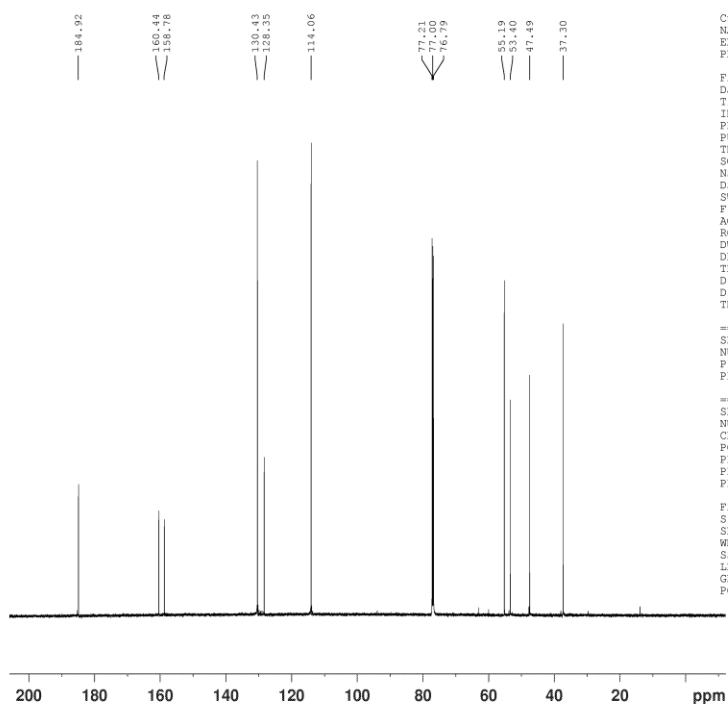

Current Data Parameters  
NAME GG-7-115-C13  
EXPNO 2  
PROCNO 1

F2 - Acquisition Parameters  
Date\_ 20140613  
Time 0.58  
INSTRUM spect  
PROBHD 5 mm CPQCI 1H/  
PULPROG zgpg30  
TD 65536  
SOLVENT CDC13  
NS 128  
DS 4  
SWH 36057.691 MHz  
FIDRES 0.350197 Hz  
AQ 0.9087659 sec  
RG 203  
DW 13.867 usec  
DE 18.00 usec  
TE 298.1 K  
D1 2.00000000 sec  
D11 0.03000000 sec  
TD0 1

===== CHANNEL f1 =====  
SFO1 150.9178981 MHz  
NUC1 13C  
P1 11.35 usec  
PLW1 230.0000000 W

===== CHANNEL f2 =====  
SFO2 600.1324005 MHz  
NUC2 1H  
CPDPRG2 waltz16  
PCPD2 90.00 usec  
PLW2 13.00000000 W  
PLW12 0.19774000 W  
PLW13 0.16017000 W

F2 - Processing parameters  
SI 32768  
SF 150.9028182 MHz  
WDW EM  
SSB 0  
LB 1.00 Hz  
GB 0  
PC 1.40

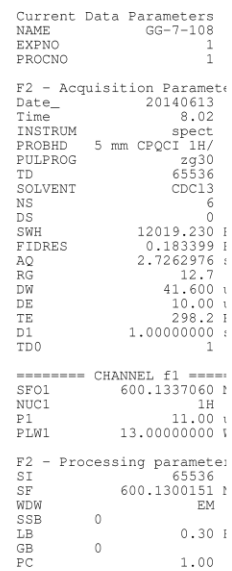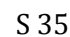

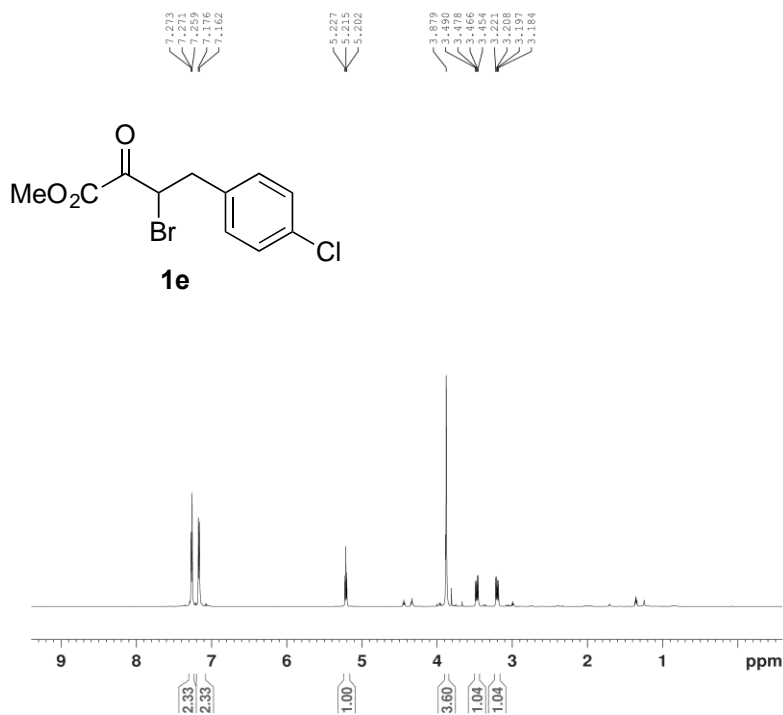

Current Data Parameters  
NAME GG-7-118  
EXPNO 1  
PROCNO 1

F2 - Acquisition Parameters  
Date\_ 20140613  
Time 8.07  
INSTRUM spect  
PROBHD 5 mm CPQCI 1H/  
PULPROG zg30  
TD 65536  
SOLVENT CDCl<sub>3</sub>  
NS 10  
DS 0  
SWH 12019.230 MHz  
FIDRES 0.183399 Hz  
AQ 2.7262976 sec  
RG 10  
DW 41.600 usec  
DE 10.00 usec  
TE 298.1 K  
D1 1.00000000 sec  
TD0 1

===== CHANNEL f1 =====  
SFO1 600.1337060 MHz  
NUC1 1H  
P1 11.00 usec  
PLW1 13.00000000 W

F2 - Processing parameters  
SI 65536  
SF 600.1300140 MHz  
WDW EM  
SSB 0  
LB 0.30 Hz  
GB 0  
PC 1.00

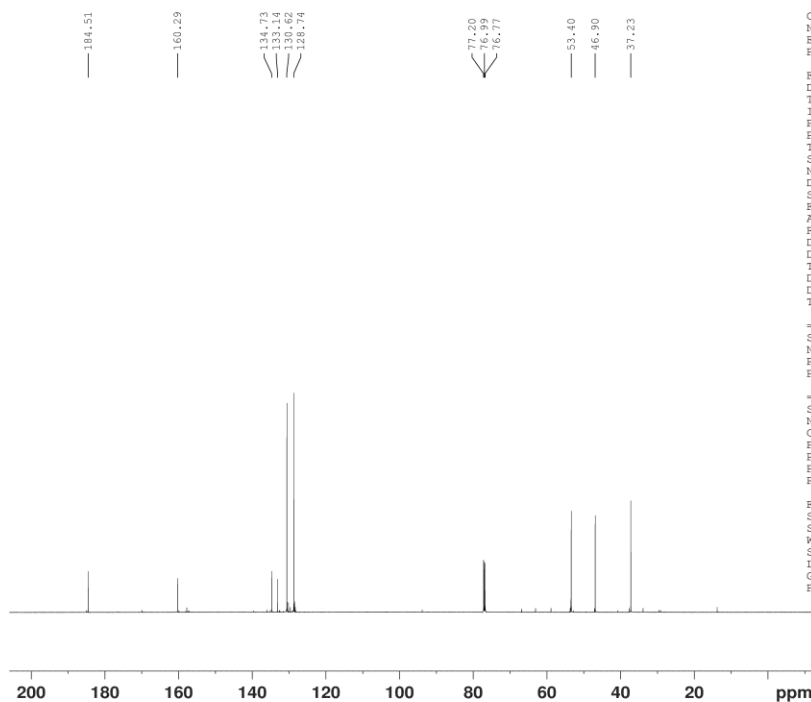

Current Data Parameters  
NAME GG-7-118-C13  
EXPNO 1  
PROCNO 1

F2 - Acquisition Parameters  
Date\_ 20140613  
Time 8.17  
INSTRUM spect  
PROBHD 5 mm CPQCI 1H/  
PULPROG zgpg30  
TD 65536  
SOLVENT CDCl<sub>3</sub>  
NS 273  
DS 0  
SWH 36057.691 MHz  
FIDRES 0.550197 Hz  
AQ 0.9087659 sec  
RG 203  
DW 13.867 usec  
DE 18.00 usec  
TE 298.2 K  
D1 2.00000000 sec  
D11 0.03000000 sec  
TD0 1

===== CHANNEL f1 =====  
SFO1 150.9178981 MHz  
NUC1 13C  
P1 11.35 usec  
PLW1 230.00000000 W

===== CHANNEL f2 =====  
SFO2 600.1324005 MHz  
NUC2 1H  
CPDPRG2 waltz16  
PCPD2 90.00 usec  
PLW2 13.00000000 W  
PLW12 0.19774000 W  
PLW13 0.16017000 W

F2 - Processing parameters  
SI 32768  
SF 150.9028309 MHz  
WDW EM  
SSB 0  
LB 1.00 Hz  
GB 0  
PC 1.40

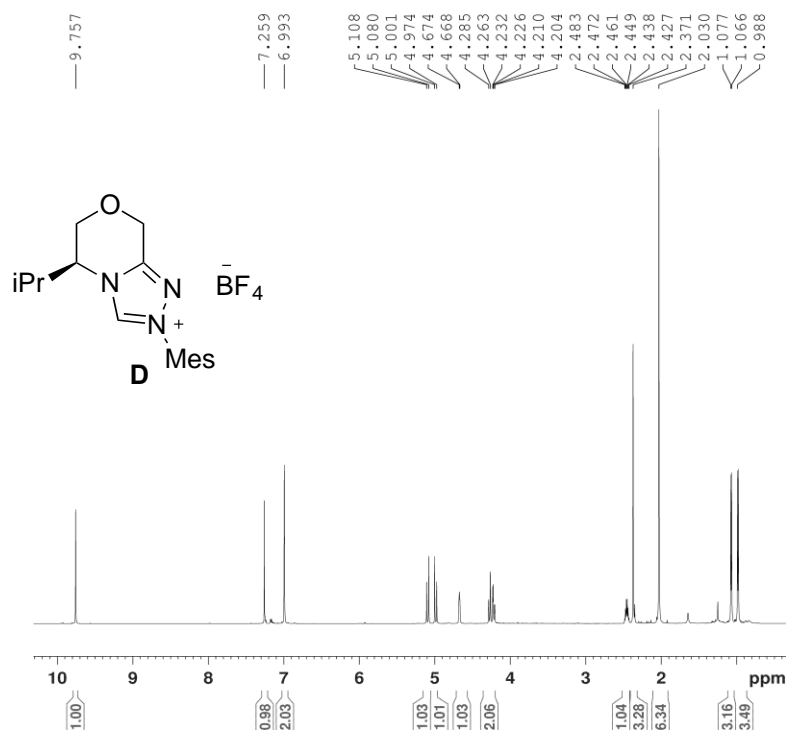

Current Data Parameters  
NAME GG-6-269  
EXPNO 1  
PROCNO 1

F2 - Acquisition Paramet  
Date\_ 20140613  
Time 8.28  
INSTRUM spect  
PROBHD 5 mm CPQCI 1H/  
PULPROG zg30  
TD 65536  
SOLVENT CDC13  
NS 16  
DS 0  
SWH 12019.230  
FIDRES 0.183399  
AQ 2.7262976  
RG 32  
DW 41.600  
DE 10.00  
TE 298.2  
D1 1.00000000  
TD0 1

===== CHANNEL f1 =====  
SFO1 600.1337060  
NUC1 1H  
P1 11.00  
PLW1 13.00000000

F2 - Processing paramete  
SI 65536  
SF 600.1300148  
WDW EM  
SSB 0  
LB 0.30  
GB 0  
PC 1.00

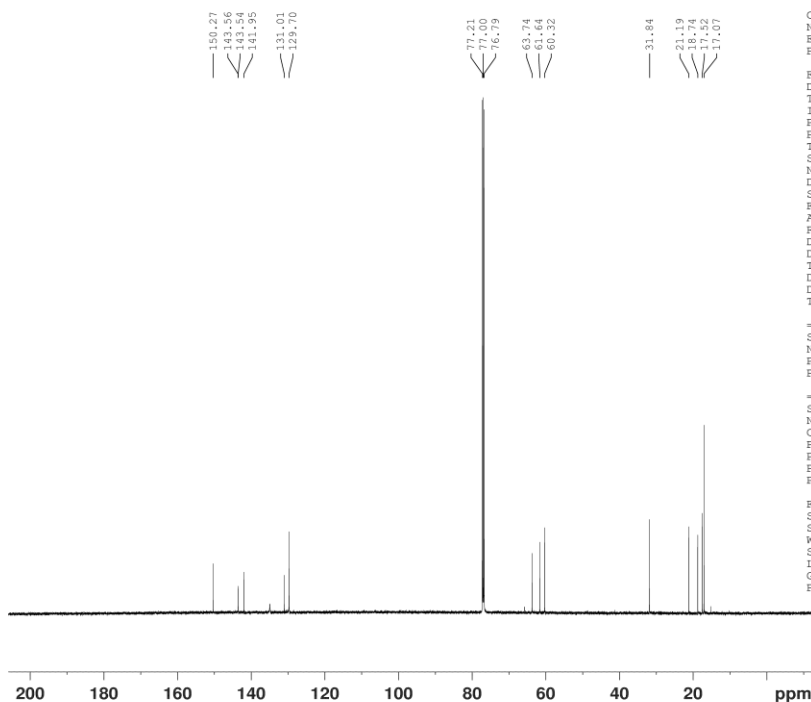

Current Data Parameters  
NAME GG-6-269-cl3  
EXPNO 2  
PROCNO 1

F2 - Acquisition Parameters  
Date\_ 20140613  
Time 0.39  
INSTRUM spect  
PROBHD 5 mm CPQCI 1H/  
PULPROG zgpg30  
TD 65536  
SOLVENT CDC13  
NS 128  
DS 4  
SWH 36057.691 Hz  
FIDRES 0.550197 Hz  
AQ 0.9087659 sec  
RG 203  
DW 13.867 usec  
DE 18.00 usec  
TE 298.1 K  
D1 2.00000000 sec  
D11 0.03000000 sec  
TD0 1

===== CHANNEL f1 =====  
SFO1 150.9178981 MHz  
NUC1 13C  
P1 11.35 usec  
PLW1 230.00000000 W

===== CHANNEL f2 =====  
SFO2 600.1324005 MHz  
NUC2 1H  
CPDPRG2 waltz16  
PCPD2 90.00 usec  
PLW2 13.00000000 W  
PLW12 0.19774000 W  
PLW13 0.16017000 W

F2 - Processing parameters  
SI 32768  
SF 150.9028150 MHz  
WDW EM  
SSB 0  
LB 1.00 Hz  
GB 0  
PC 1.40

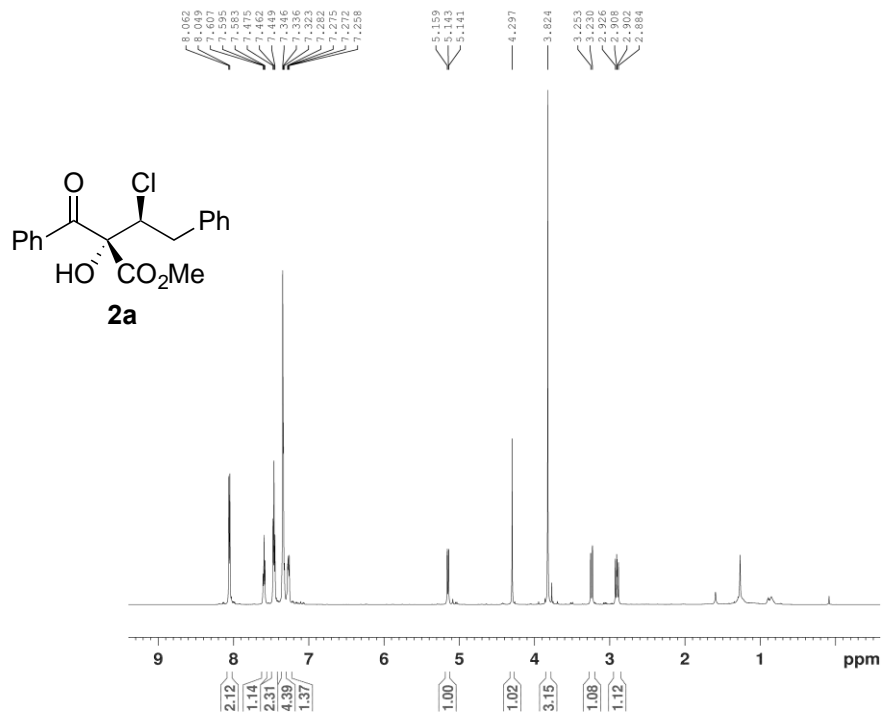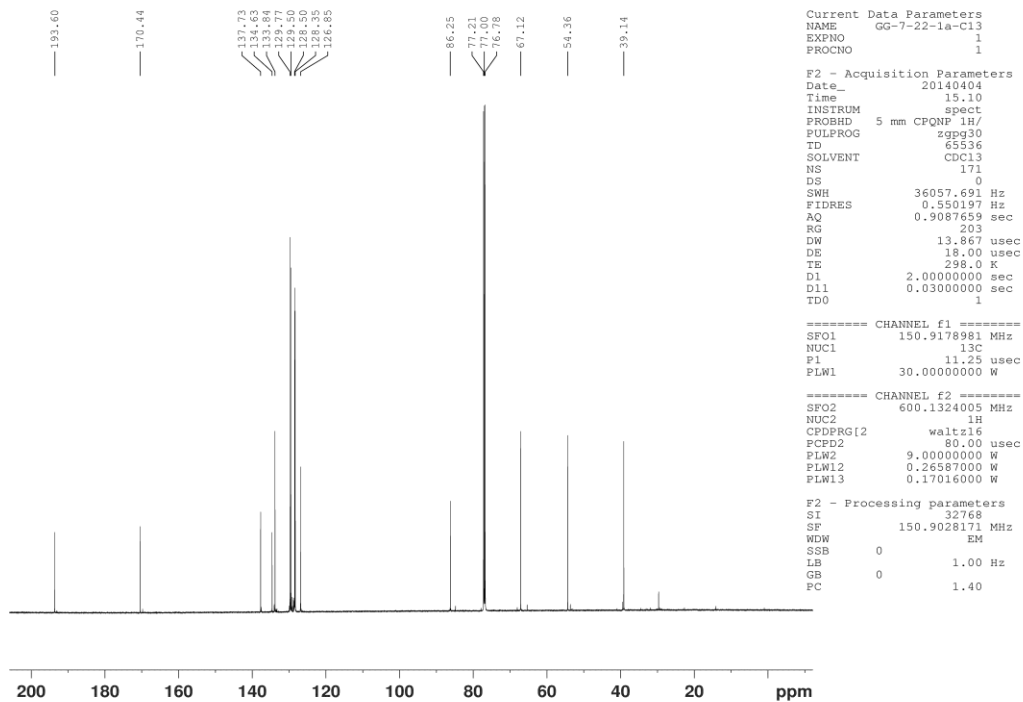

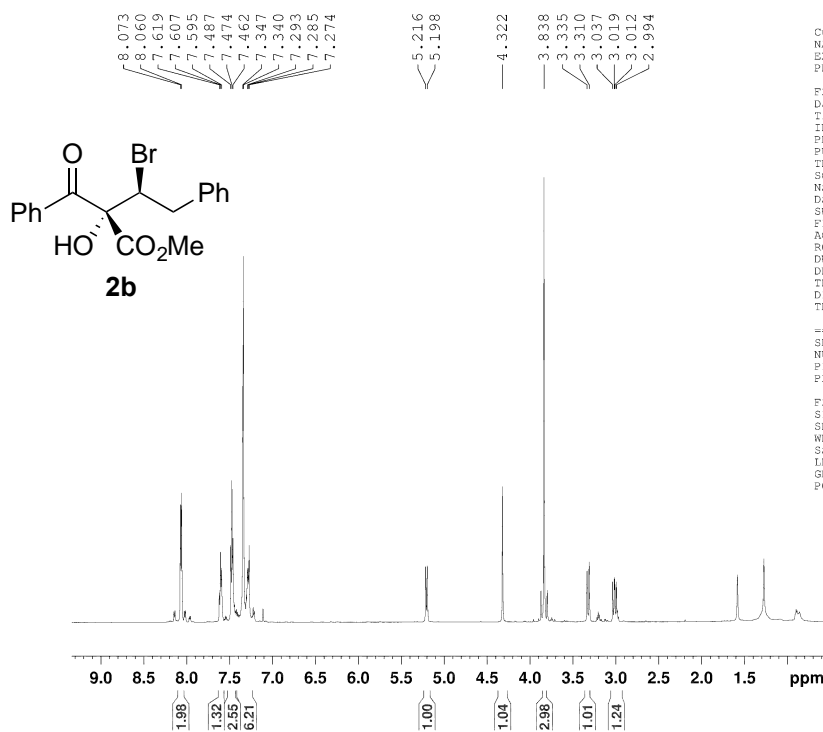

```

Current Data Parameters
NAME      GG-8-92-1
EXPNO     1
PROCNO    1

F2 - Acquisition Parameters
Date_     20140923
Time      14.20
INSTRUM   spect
PROBHD    5 mm CPQCT 1H/
PULPROG   zg30
TD         65536
SOLVENT   CDCl3
NS         8
DS         0
SWH        12019.230 Hz
FIDRES     0.183399 Hz
AQ         2.7262976 sec
RG         14.2
DW         41.600 usec
DE         10.00 usec
TE         298.0 K
D1         1.00000000 sec
TD0        1

===== CHANNEL f1 =====
SFO1      600.1337060 MHz
NUC1       1H
P1         10.35 usec
PLW1       13.00000000 W

F2 - Processing parameters
SI         65536
SF         600.1300076 MHz
WDW        EM
SSB        0
LB         0.30 Hz
GB         0
PC         1.00

```

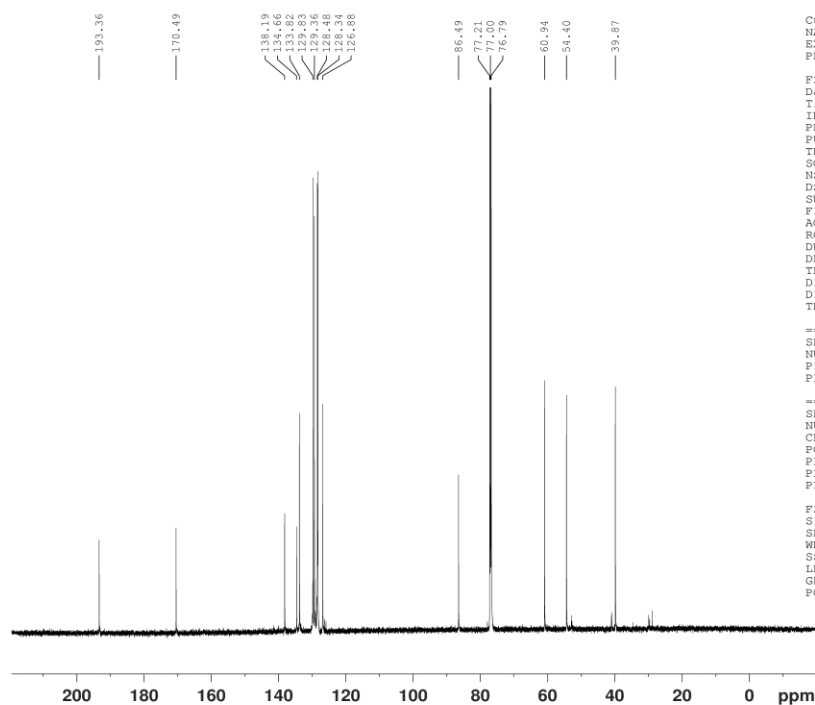

```

Current Data Parameters
NAME      GG-6-302-2a-Cl3
EXPNO     1
PROCNO    1

F2 - Acquisition Parameters
Date_     20140402
Time      12.52
INSTRUM   spect
PROBHD    5 mm CPQNP 1H/
PULPROG   zgpg30
TD         65536
SOLVENT   CDCl3
NS         33
DS         0
SWH        36057.691 Hz
FIDRES     0.550197 Hz
AQ         0.9087659 sec
RG         203
DW         13.867 usec
DE         18.00 usec
TE         298.0 K
D1         2.00000000 sec
D11        0.03000000 sec
TD0        1

===== CHANNEL f1 =====
SFO1      150.9178981 MHz
NUC1       13C
P1         11.25 usec
PLW1       30.00000000 W

===== CHANNEL f2 =====
SFO2      600.1324005 MHz
NUC2       1H
CPDPRG2   waltz16
PCPD2     80.00 usec
PLW2       9.00000000 W
PLW12     0.26587000 W
PLW13     0.17016000 W

F2 - Processing parameters
SI         32768
SF         150.9028195 MHz
WDW        EM
SSB        0
LB         1.00 Hz
GB         0
PC         1.40

```

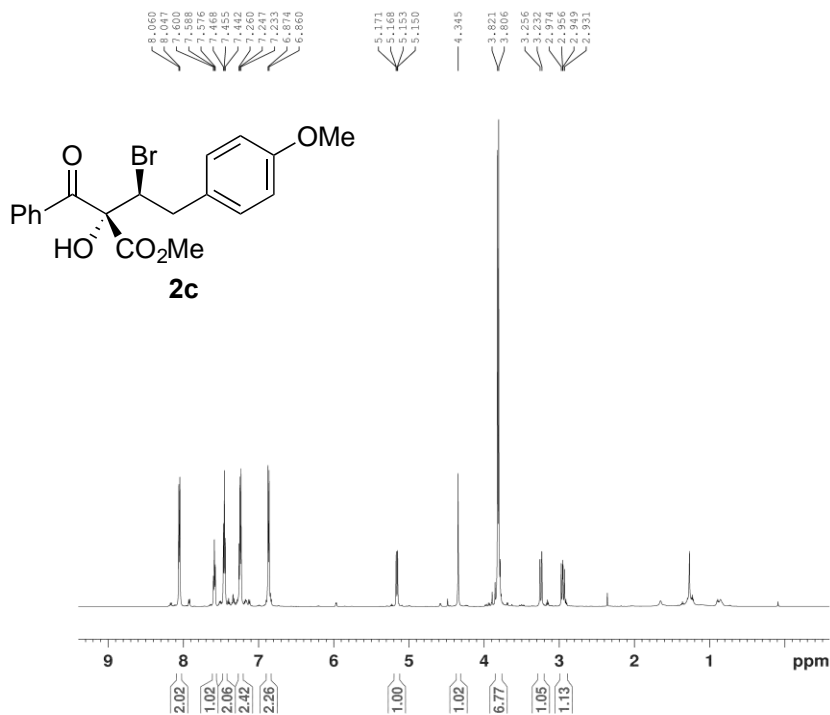

Current Data Parameters  
NAME GG-7-124-2a  
EXPNO 1  
PROCNO 1

F2 - Acquisition Parameters  
Date\_ 20140506  
Time 15.47  
INSTRUM spect  
PROBHD 5 mm CPQCI 1H/  
PULPROG zg30  
TD 65536  
SOLVENT CDC13  
NS 12  
DS 0  
SWH 12019.230 MHz  
FIDRES 0.183399 Hz  
AQ 2.7262976 sec  
RG 22.6  
DW 41.600 usec  
DE 10.00 usec  
TE 298.0 K  
D1 1.00000000 sec  
TD0 1

===== CHANNEL f1 =====  
SFO1 600.1337060 MHz  
NUC1 1H  
P1 11.00 usec  
PLW1 13.00000000 W

F2 - Processing parameters  
SI 65536  
SF 600.1300140 MHz  
WDW EM  
SSB 0  
LB 0.30 Hz  
GB 0  
PC 1.00

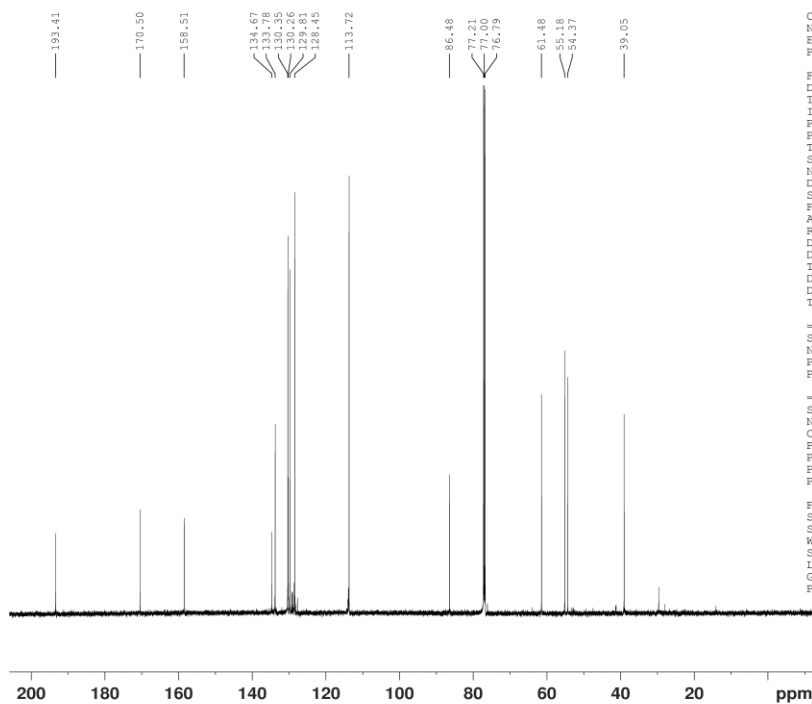

Current Data Parameters  
NAME GG-7-124-2-cl3  
EXPNO 1  
PROCNO 1

F2 - Acquisition Parameters  
Date\_ 20140506  
Time 15.50  
INSTRUM spect  
PROBHD 5 mm CPQCI 1H/  
PULPROG zgpg30  
TD 65536  
SOLVENT CDC13  
NS 53  
DS 0  
SWH 36057.691 MHz  
FIDRES 0.550197 Hz  
AQ 0.9087659 sec  
RG 203  
DW 13.867 usec  
DE 18.00 usec  
TE 298.0 K  
D1 2.00000000 sec  
D11 0.03000000 sec  
TD0 1

===== CHANNEL f1 =====  
SFO1 150.9178981 MHz  
NUC1 13C  
P1 11.35 usec  
PLW1 230.00000000 W

===== CHANNEL f2 =====  
SFO2 600.1324005 MHz  
NUC2 1H  
CPDPRG2 waltz16  
PCPD2 90.00 usec  
PLW2 13.00000000 W  
PLW12 0.19774000 W  
PLW13 0.16017000 W

F2 - Processing parameters  
SI 32768  
SF 150.9028195 MHz  
WDW EM  
SSB 0  
LB 1.00 Hz  
GB 0  
PC 1.40



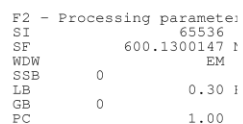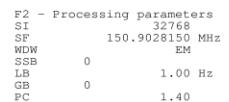

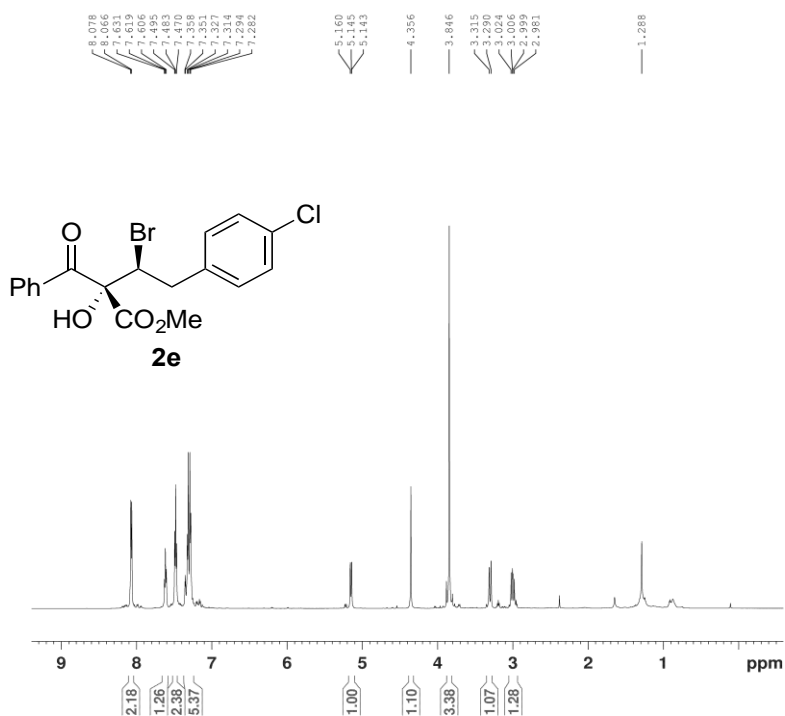

Current Data Parameters  
NAME GG-7-125-2a  
EXPNO 1  
PROCNO 1

F2 - Acquisition Parameters  
Date\_ 20140506  
Time 17.45  
INSTRUM spect  
PROBHD 5 mm CPQCI 1H/  
PULPROG zg30  
TD 65536  
SOLVENT CDCl3  
NS 8  
DS 0  
SWH 12019.230 MHz  
FIDRES 0.183399 Hz  
AQ 2.7262976 sec  
RG 32  
DW 41.600 nsec  
DE 10.00 nsec  
TE 298.0 K  
D1 1.00000000 sec  
TD0 1

===== CHANNEL f1 =====  
SF01 600.1337060 MHz  
NUC1 1H  
P1 11.00 nsec  
PLW1 13.00000000 W

F2 - Processing parameters:  
SI 65536  
SF 600.1300000 MHz  
WDW EM  
SSB 0  
LB 0.30 Hz  
GB 0  
PC 1.00

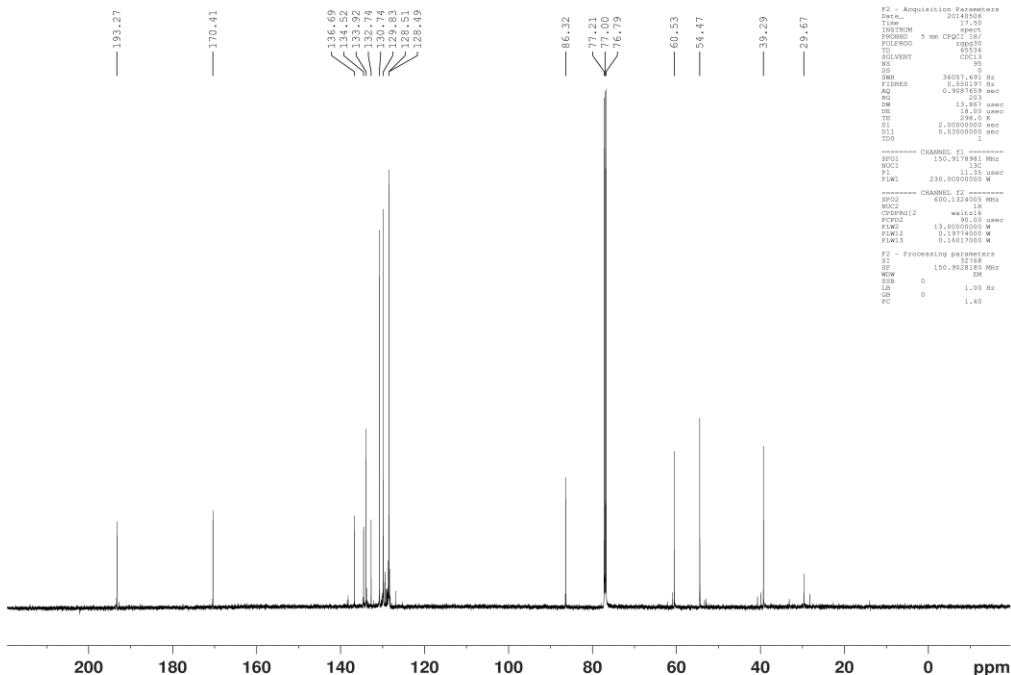

Current Data Parameters  
NAME GG-7-125-2-CL3  
EXPNO 1  
PROCNO 1

F2 - Acquisition Parameters  
Date\_ 20140506  
Time 17.50  
INSTRUM spect  
PROBHD 5 mm CPQCI 1H/  
PULPROG zg30  
TD 65536  
SOLVENT CDCl3  
NS 8  
DS 0  
SWH 36057.681 MHz  
FIDRES 0.300100 Hz  
AQ 0.9087618 sec  
RG 32  
DW 13.887 nsec  
DE 18.40 nsec  
TE 298.0 K  
D1 2.00000000 sec  
D11 0.83000000 sec  
TD0 1

===== CHANNEL f1 =====  
SF01 150.917881 MHz  
NUC1 13C  
P1 11.30 nsec  
PLW1 230.00000000 W

===== CHANNEL f2 =====  
SF02 600.1324018 MHz  
NUC2 1H  
CPDPRG2 waltz16  
PULPROG 13.00000000 W  
FIDRES 0.19774000 MHz  
F1W12 0.19774000 W  
F1W13 0.14017000 W

F2 - Processing parameters:  
SI 13104  
SF 150.9028180 MHz  
WDW EM  
SSB 0  
LB 1.00 Hz  
GB 0  
PC 1.00

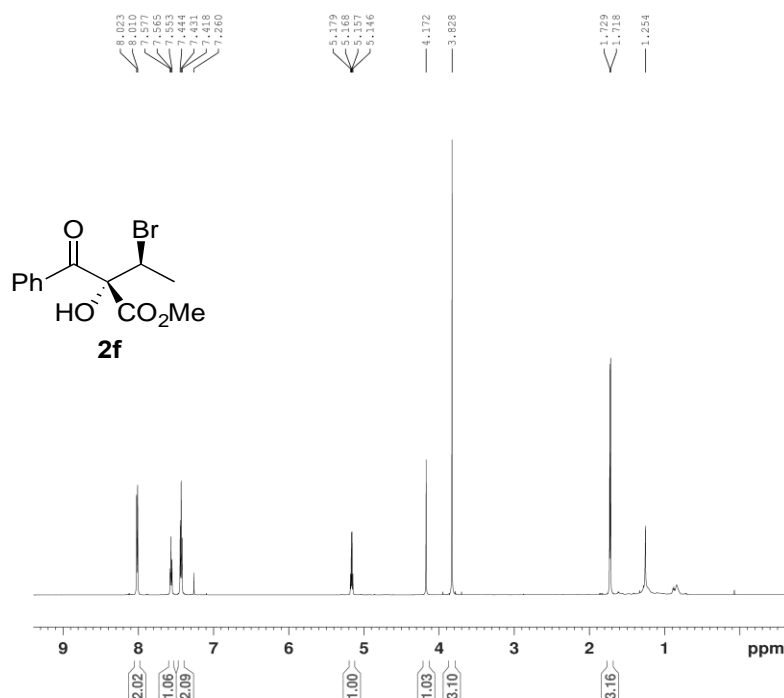

Current Data Parameters  
 NAME GG-7-69-1a  
 EXPNO 1  
 PROCNO 1

F2 - Acquisition Parameters  
 Date\_ 20140421  
 Time 7.25  
 INSTRUM spect  
 PROBHD 5 mm CPQCI 1H/  
 PULPROG zg30  
 TD 65536  
 SOLVENT CDCl3  
 NS 6  
 DS 0  
 SWH 12019.230  
 FIDRES 0.183399  
 AQ 2.7262976  
 RG 12.7  
 DW 41.600  
 DE 10.00  
 TE 298.0  
 D1 1.00000000  
 TD0 1

===== CHANNEL f1 =====  
 SFO1 600.1337060  
 NUC1 1H  
 P1 11.00  
 PLW1 13.00000000

F2 - Processing parameters  
 SI 65536  
 SF 600.1300137  
 WDW EM  
 SSB 0  
 GB 0  
 PC 1.00

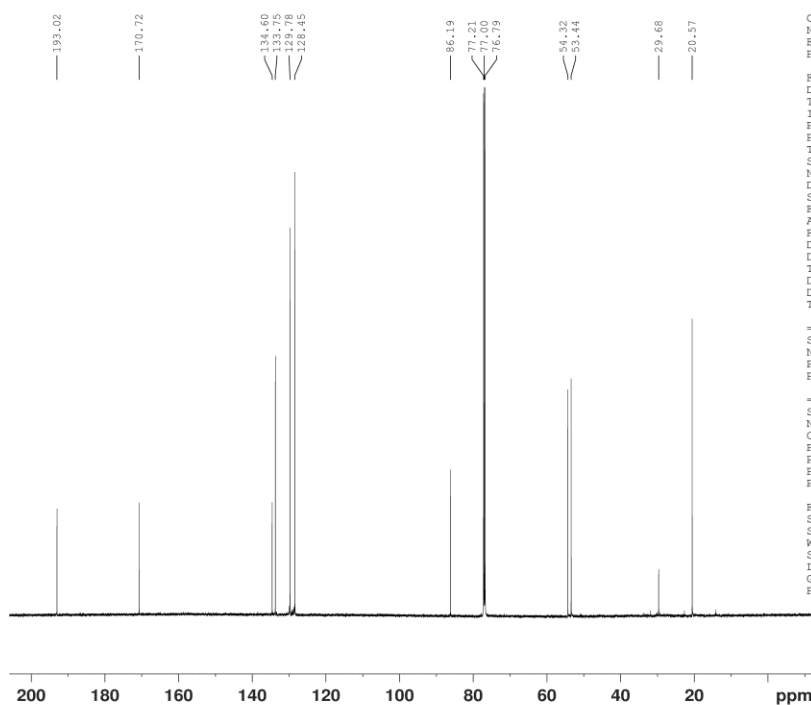

Current Data Parameters  
 NAME GG-7-69-C13  
 EXPNO 1  
 PROCNO 1

F2 - Acquisition Parameters  
 Date\_ 20140421  
 Time 7.48  
 INSTRUM spect  
 PROBHD 5 mm CPQCI 1H/  
 PULPROG zgpg30  
 TD 65536  
 SOLVENT CDCl3  
 NS 230  
 DS 0  
 SWH 36057.691 Hz  
 FIDRES 0.550197 Hz  
 AQ 0.9087659 sec  
 RG 203  
 DW 13.867 usec  
 DE 18.00 usec  
 TE 298.0 K  
 D1 2.00000000 sec  
 D11 0.03000000 sec  
 TD0 1

===== CHANNEL f1 =====  
 SFO1 150.9178981 MHz  
 NUC1 13C  
 P1 11.35 usec  
 PLW1 230.00000000 W

===== CHANNEL f2 =====  
 SFO2 600.1324005 MHz  
 NUC2 1H  
 CPDPRG2 waltz16  
 PCPD2 90.00 usec  
 PLW2 13.00000000 W  
 PLW12 0.19774000 W  
 PLW13 0.16017000 W

F2 - Processing parameters  
 SI 32768  
 SF 150.9028151 MHz  
 WDW EM  
 SSB 0  
 LB 1.00 Hz  
 GB 0  
 PC 1.40

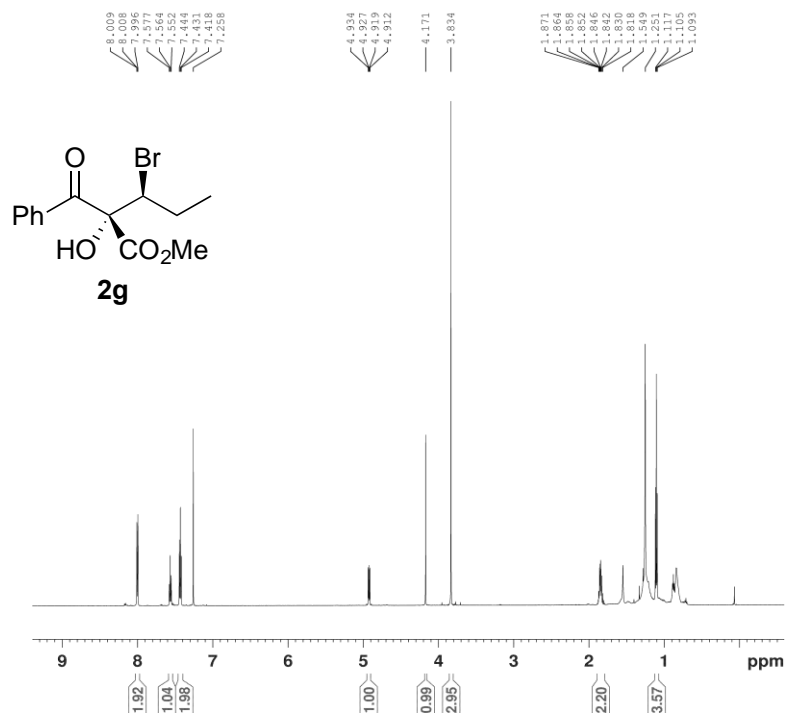

Current Data Parameters  
NAME GG-7-70-1a  
EXPNO 1  
PROCNO 1

F2 - Acquisition Parameters  
Date\_ 20140421  
Time 7.27  
INSTRUM spect  
PROBHD 5 mm CPQCI 1H/  
PULPROG zg30  
TD 65536  
SOLVENT CDC13  
NS 5  
DS 0  
SWH 12019.230 MHz  
FIDRES 0.183399 Hz  
AQ 2.7262976 sec  
RG 14.2  
DW 41.600 usec  
DE 10.00 usec  
TE 298.0 K  
D1 1.00000000 sec  
TD0 1

===== CHANNEL f1 =====  
SFO1 600.1337060 MHz  
NUC1 1H  
P1 11.00 usec  
PLW1 13.00000000 W

F2 - Processing parameters  
SI 65536  
SF 600.1300150 MHz  
WDW EM  
SSB 0  
LB 0.30 Hz  
GB 0  
PC 1.00

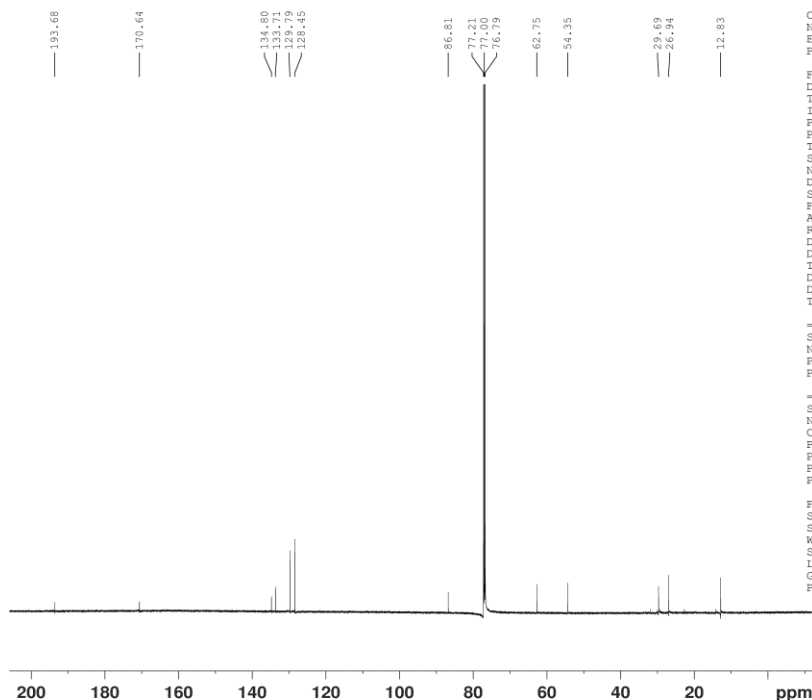

Current Data Parameters  
NAME GG-7-70-C13  
EXPNO 1  
PROCNO 1

F2 - Acquisition Parameters  
Date\_ 20140421  
Time 8.00  
INSTRUM spect  
PROBHD 5 mm CPQCI 1H/  
PULPROG zgpg30  
TD 65536  
SOLVENT CDC13  
NS 528  
DS 0  
SWH 36057.691 MHz  
FIDRES 0.550197 Hz  
AQ 0.9087659 sec  
RG 203  
DW 13.867 usec  
DE 18.00 usec  
TE 298.0 K  
D1 2.00000000 sec  
D11 0.03000000 sec  
TD0 1

===== CHANNEL f1 =====  
SFO1 150.9178981 MHz  
NUC1 13C  
P1 11.35 usec  
PLW1 230.00000000 W

===== CHANNEL f2 =====  
SFO2 600.1324005 MHz  
NUC2 1H  
CPDPRG2 waltz16  
PCPD2 90.00 usec  
PLW2 13.00000000 W  
PLW12 0.19774000 W  
PLW13 0.16017000 W

F2 - Processing parameters  
SI 32768  
SF 150.9028119 MHz  
WDW EM  
SSB 0  
LB 1.00 Hz  
GB 0  
PC 1.40

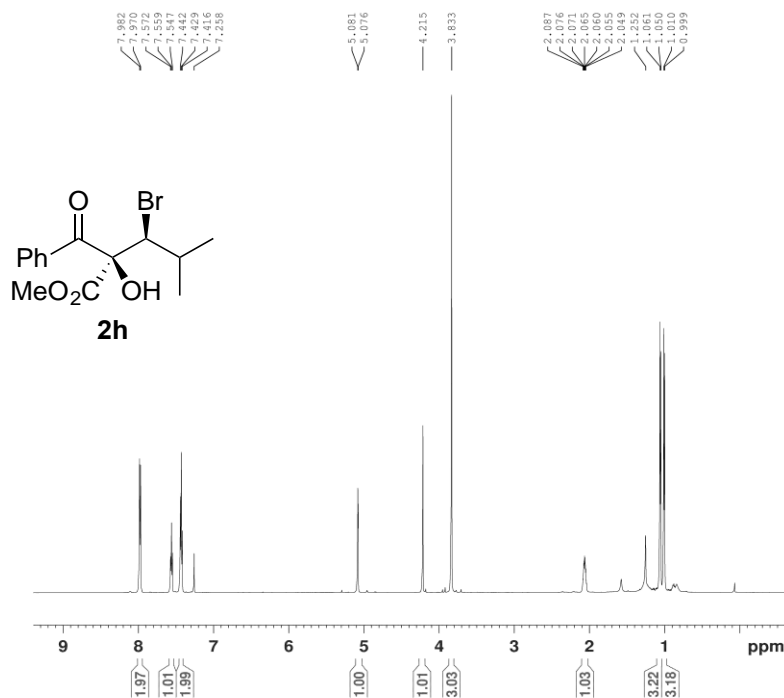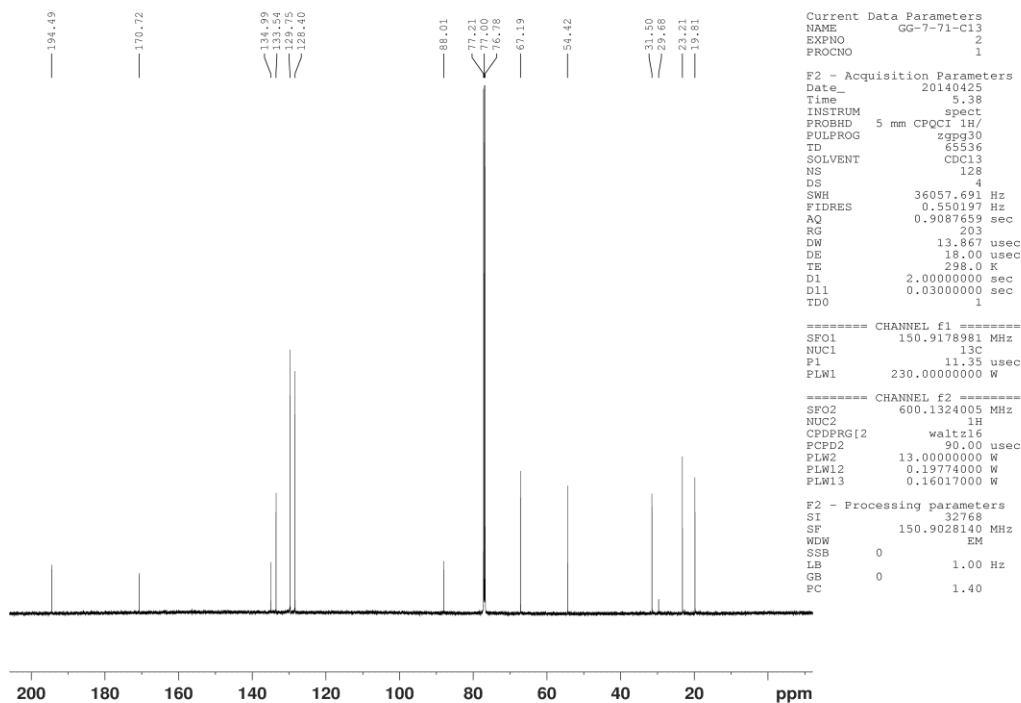

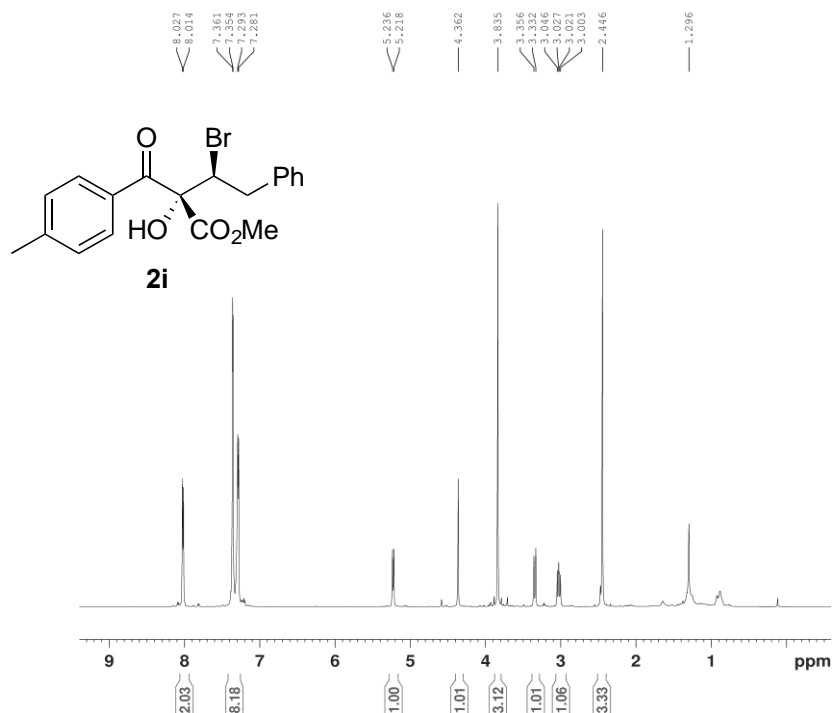

Current Data Parameters  
NAME GG-7-40-2  
EXPNO 1  
PROCNO 1

F2 - Acquisition Parameters  
Date\_ 20140411  
Time 8.11  
INSTRUM spect  
PROBHD 5 mm CPQNP 1H/  
PULPROG zg30  
TD 65536  
SOLVENT CDCl<sub>3</sub>  
NS 9  
DS 0  
SWH 12019.230 MHz  
FIDRES 0.183399 Hz  
AQ 2.7262976 sec  
RG 32  
DW 41.600 μsec  
DE 10.00 μsec  
TE 298.0 K  
D1 1.00000000 sec  
TD0 1

===== CHANNEL f1 =====  
SFO1 600.1337060 MHz  
NUC1 1H  
P1 13.75 μsec  
PLW1 9.00000000 W

F2 - Processing parameters:  
SI 65536  
SF 600.1300000 MHz  
WDW EM  
SSB 0  
LB 0.30 Hz  
GB 0  
PC 1.00

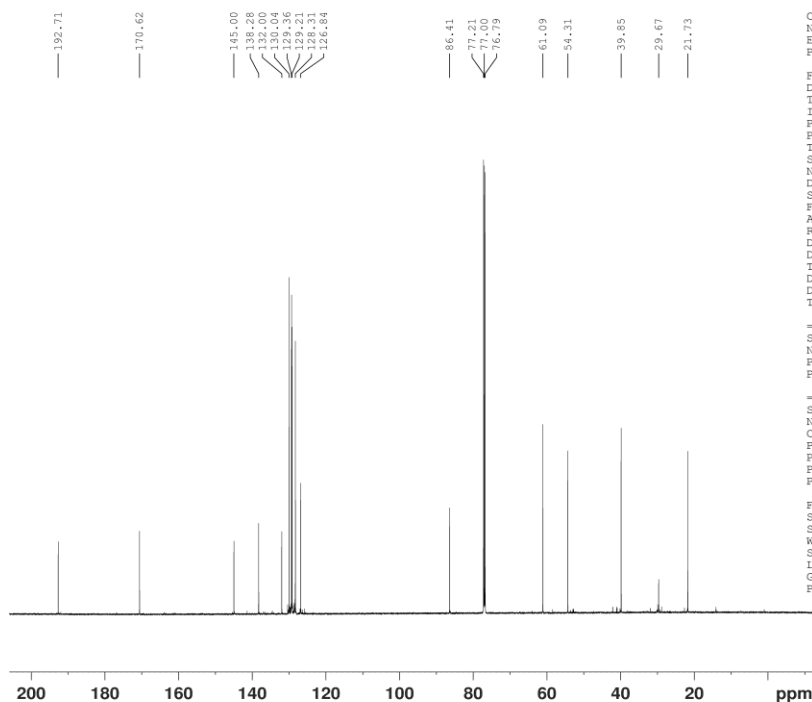

Current Data Parameters  
NAME GG-7-40-2-cl3  
EXPNO 1  
PROCNO 1

F2 - Acquisition Parameters  
Date\_ 20140411  
Time 8.16  
INSTRUM spect  
PROBHD 5 mm CPQNP 1H/  
PULPROG zgpg30  
TD 65536  
SOLVENT CDCl<sub>3</sub>  
NS 76  
DS 0  
SWH 36057.691 MHz  
FIDRES 0.550197 Hz  
AQ 0.9087659 sec  
RG 203  
DW 13.867 μsec  
DE 18.00 μsec  
TE 298.0 K  
D1 2.00000000 sec  
D11 0.03000000 sec  
TD0 1

===== CHANNEL f1 =====  
SFO1 150.9178981 MHz  
NUC1 13C  
P1 11.25 μsec  
PLW1 30.00000000 W

===== CHANNEL f2 =====  
SFO2 600.1324005 MHz  
NUC2 1H  
CPDPRG2 waltz16  
PCPD2 80.00 μsec  
PLW2 9.00000000 W  
PLW12 0.26587000 W  
PLW13 0.17016000 W

F2 - Processing parameters  
SI 32768  
SF 150.9028194 MHz  
WDW EM  
SSB 0  
LB 1.00 Hz  
GB 0  
PC 1.40

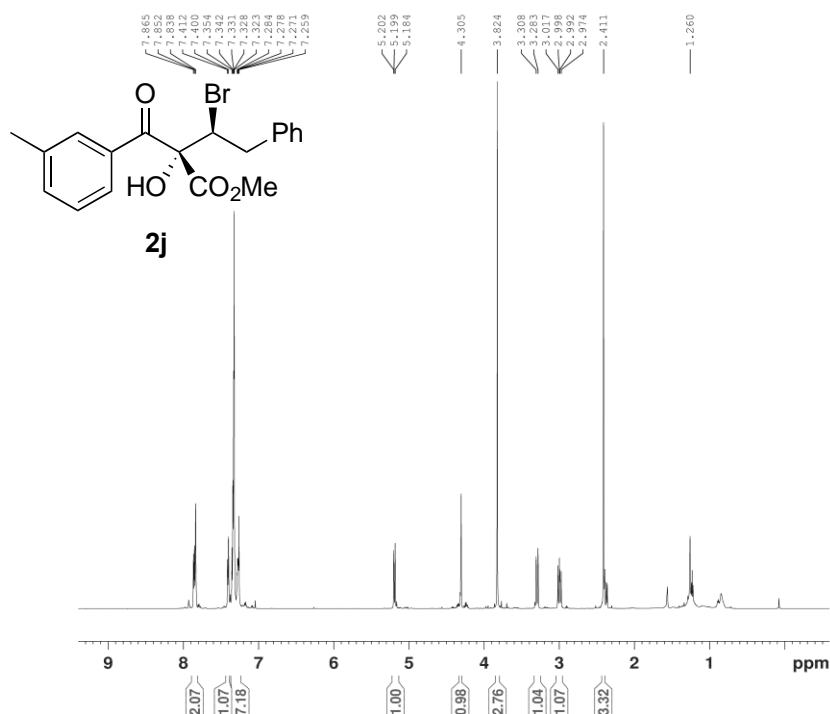

Current Data Parameters  
NAME GG-7-47-1  
EXPNO 1  
PROCNO 1

F2 - Acquisition Parameters  
Date\_ 20140411  
Time 8.18  
INSTRUM spect  
PROBHD 5 mm CPQNP 1H/  
PULPROG zg30  
TD 65536  
SOLVENT CDC13  
NS 16  
DS 0  
SWH 12019.230 MHz  
FIDRES 0.183399 Hz  
AQ 2.7262976 sec  
RG 64  
DW 41.600 usec  
DE 10.00 usec  
TE 298.0 K  
D1 1.00000000 sec  
TD0 1

===== CHANNEL f1 =====  
SFO1 600.1337060 MHz  
NUC1 1H  
P1 13.75 usec  
PLW1 9.00000000 W

F2 - Processing parameters  
SI 65536  
SF 600.1300144 MHz  
WDW EM  
SSB 0  
LB 0.30 Hz  
GB 0  
PC 1.00

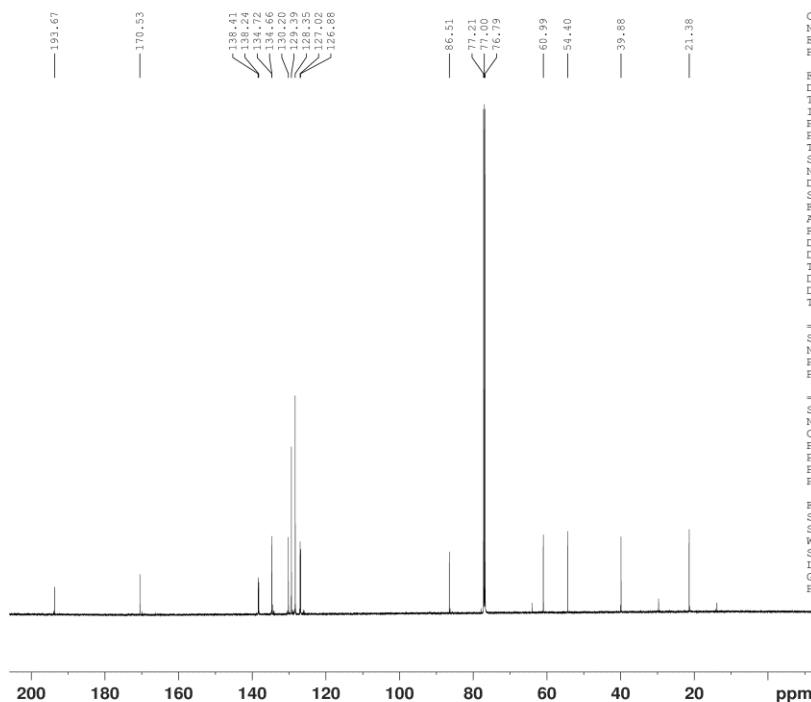

Current Data Parameters  
NAME GG-7-47-1-CL13  
EXPNO 1  
PROCNO 1

F2 - Acquisition Parameters  
Date\_ 20140411  
Time 8.26  
INSTRUM spect  
PROBHD 5 mm CPQNP 1H/  
PULPROG zgpg30  
TD 65536  
SOLVENT CDC13  
NS 78  
DS 0  
SWH 36057.691 MHz  
FIDRES 0.550197 Hz  
AQ 0.9087659 sec  
RG 203  
DW 13.867 usec  
DE 18.00 usec  
TE 298.0 K  
D1 2.00000000 sec  
D11 0.03000000 sec  
TD0 1

===== CHANNEL f1 =====  
SFO1 150.9178981 MHz  
NUC1 13C  
P1 11.25 usec  
PLW1 30.00000000 W

===== CHANNEL f2 =====  
SFO2 600.1324005 MHz  
NUC2 1H  
CPDPRG2 waltz16  
PCPD2 80.00 usec  
PLW2 9.00000000 W  
PLW12 0.26587000 W  
PLW13 0.17016000 W

F2 - Processing parameters  
SI 32768  
SF 150.9028141 MHz  
WDW EM  
SSB 0  
LB 1.00 Hz  
GB 0  
PC 1.40

GG-7-58-1a

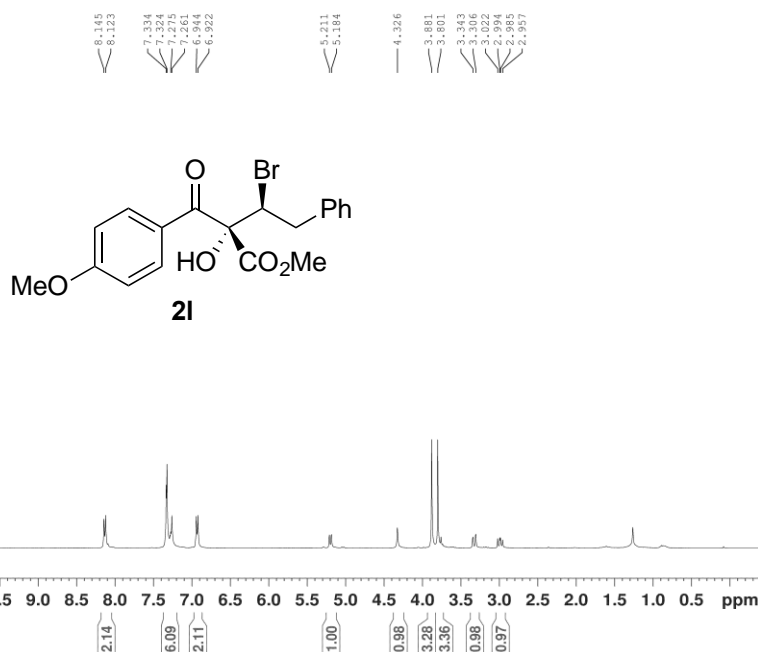

Current Data Parameters  
 NAME GG-7-58-1a  
 EXPNO 1  
 PROCNO 1

F2 - Acquisition Parameters  
 Date\_ 20140531  
 Time 11.43  
 INSTRUM spect  
 PROBHD 5 mm PABBO BB-  
 PULPROG zg30  
 TD 65536  
 SOLVENT CDCl3  
 NS 5  
 DS 0  
 SWH 8012.820 Hz  
 FIDRES 0.122266 Hz  
 AQ 4.0894465 sec  
 RG 97.5  
 DW 62.400 μs  
 DE 6.50 μs  
 TE 296.4 K  
 D1 1.00000000 sec  
 TD0 1

===== CHANNEL f1 =====  
 SFO1 399.9824700 MHz  
 NUC1 1H  
 P1 12.30 μs  
 PLW1 11.19999981 W

F2 - Processing parameters  
 SI 65536  
 SF 399.9800098 MHz  
 WDW EM  
 SSB 0  
 LB 0.30 Hz  
 GB 0  
 PC 1.00

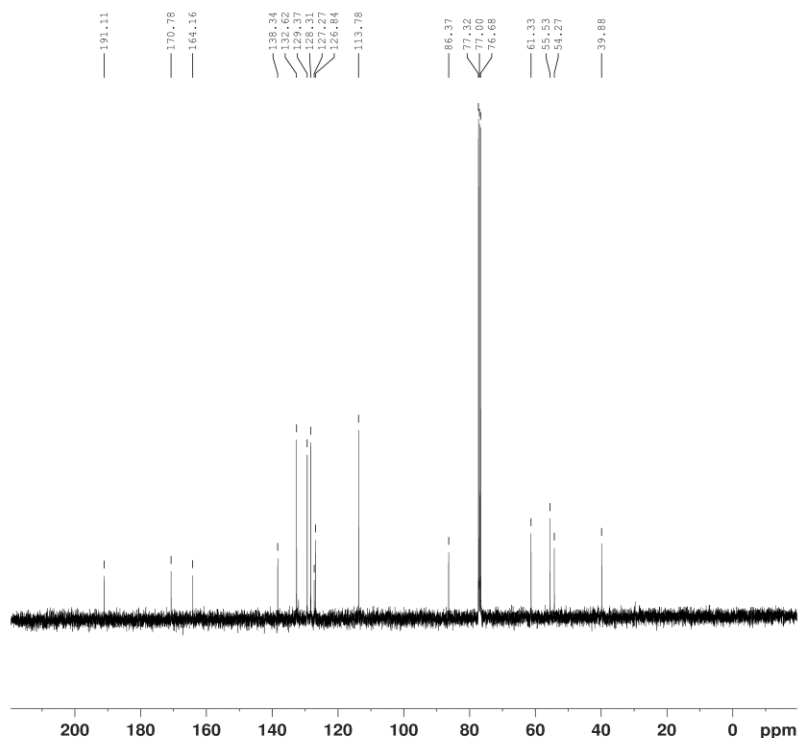

Current Data Parameters  
 NAME GG-7-58-Cl3  
 EXPNO 1  
 PROCNO 1

F2 - Acquisition Parameters  
 Date\_ 20140531  
 Time 11.51  
 INSTRUM spect  
 PROBHD 5 mm PABBO BB-  
 PULPROG zgpg30  
 TD 65536  
 SOLVENT CDCl3  
 NS 70  
 DS 0  
 SWH 24038.461 MHz  
 FIDRES 0.366798 MHz  
 AQ 1.3631488 sec  
 RG 200.09  
 DW 20.800 μs  
 DE 6.50 μs  
 TE 297.1 K  
 D1 2.00000000 sec  
 D11 0.03000000 sec  
 TD0 1

===== CHANNEL f1 =====  
 SFO1 100.5851080 MHz  
 NUC1 13C  
 P1 7.50 μs  
 PLW1 61.20000076 W

===== CHANNEL f2 =====  
 SFO2 399.9815999 MHz  
 NUC2 1H  
 CPDPRG2 waltz16  
 PCPD2 80.00 μs  
 PLW2 11.19999981 W  
 PLW12 0.26820999 W  
 PLW13 0.17166001 W

F2 - Processing parameters  
 SI 32768  
 SF 100.5750555 MHz  
 WDW EM  
 SSB 0  
 LB 1.00 MHz  
 GB 0  
 PC 1.40



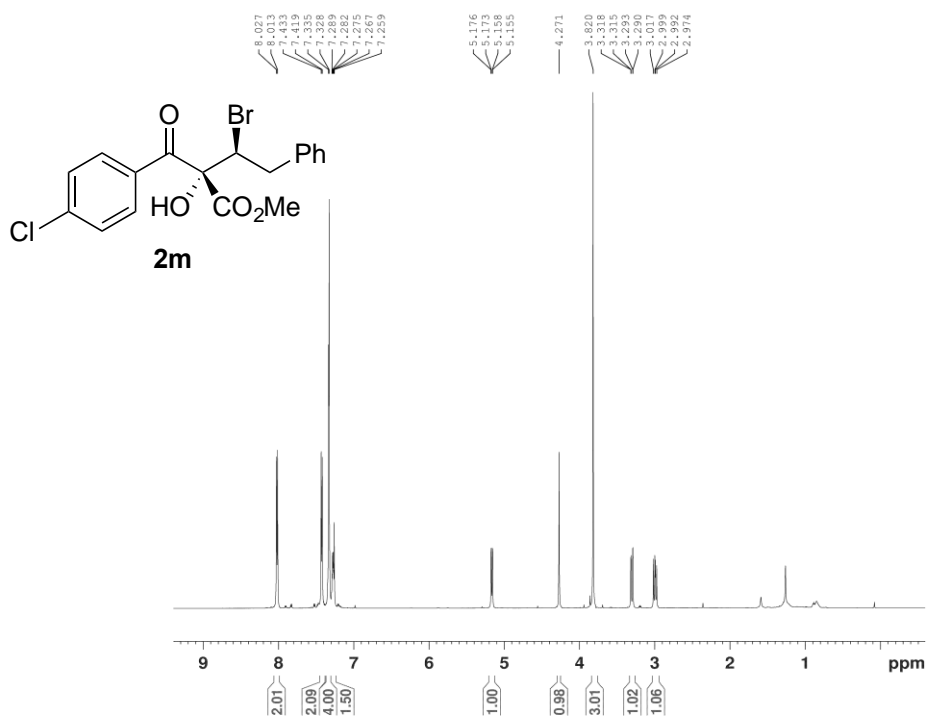

Current Data Parameters  
 NAME GG-7-75-1b  
 EXPNO 1  
 PROCNO 1

F2 - Acquisition Parameters  
 Date\_ 20140423  
 Time 10.48  
 INSTRUM spect  
 PROBHD 5 mm CPQCI 1H/  
 PULPROG zg30  
 TD 65536  
 SOLVENT CDC13  
 NS 11  
 DS 0  
 SWH 12019.230 MHz  
 FIDRES 0.183399 Hz  
 AQ 2.7262976 sec  
 RG 14.2  
 DW 41.600 μsec  
 DE 10.00 μsec  
 TE 298.0 K  
 D1 1.00000000 sec  
 TD0 1

===== CHANNEL f1 =====  
 SFO1 600.1337060 MHz  
 NUC1 1H  
 P1 11.00 μsec  
 PLW1 13.00000000 W

F2 - Processing parameters:  
 SI 65536  
 SF 600.1300146 MHz  
 WDW EM  
 SSB 0  
 LB 0.30 Hz  
 GB 0  
 PC 1.00

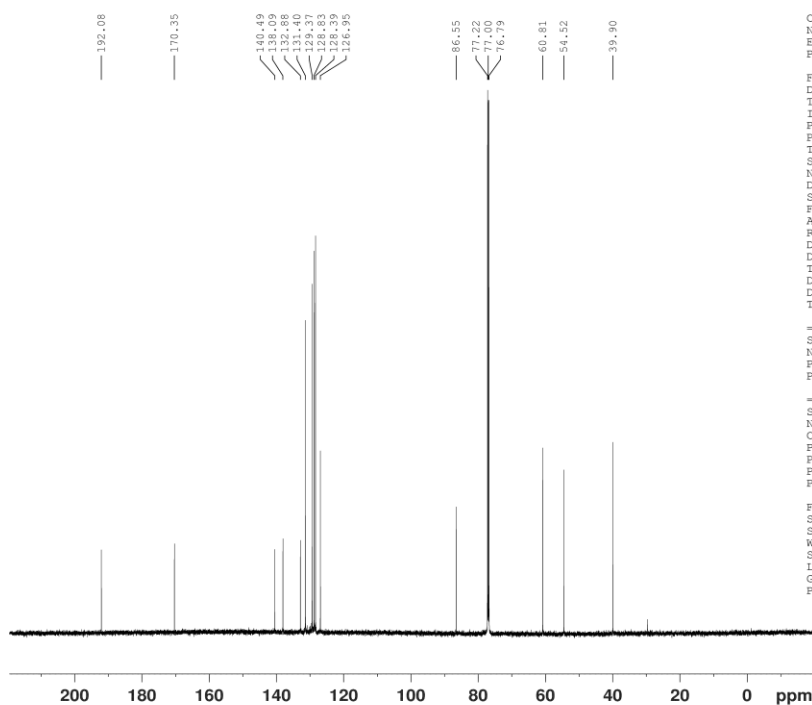

Current Data Parameters  
 NAME GG-7-75-cl3  
 EXPNO 1  
 PROCNO 1

F2 - Acquisition Parameters  
 Date\_ 20140423  
 Time 10.55  
 INSTRUM spect  
 PROBHD 5 mm CPQCI 1H/  
 PULPROG zgpg30  
 TD 65536  
 SOLVENT CDC13  
 NS 86  
 DS 0  
 SWH 36057.691 MHz  
 FIDRES 0.550197 Hz  
 AQ 0.9087659 sec  
 RG 203  
 DW 13.867 μsec  
 DE 18.00 μsec  
 TE 298.0 K  
 D1 2.00000000 sec  
 D11 0.03000000 sec  
 TD0 1

===== CHANNEL f1 =====  
 SFO1 150.9178981 MHz  
 NUC1 13C  
 P1 11.35 μsec  
 PLW1 230.00000000 W

===== CHANNEL f2 =====  
 SFO2 600.1324005 MHz  
 NUC2 1H  
 CPDPRG2 waltz16  
 PCPD2 90.00 μsec  
 PLW2 13.00000000 W  
 PLW12 0.19774000 W  
 PLW13 0.16017000 W

F2 - Processing parameters:  
 SI 32768  
 SF 150.9028150 MHz  
 WDW EM  
 SSB 0  
 LB 1.00 Hz  
 GB 0  
 PC 1.40

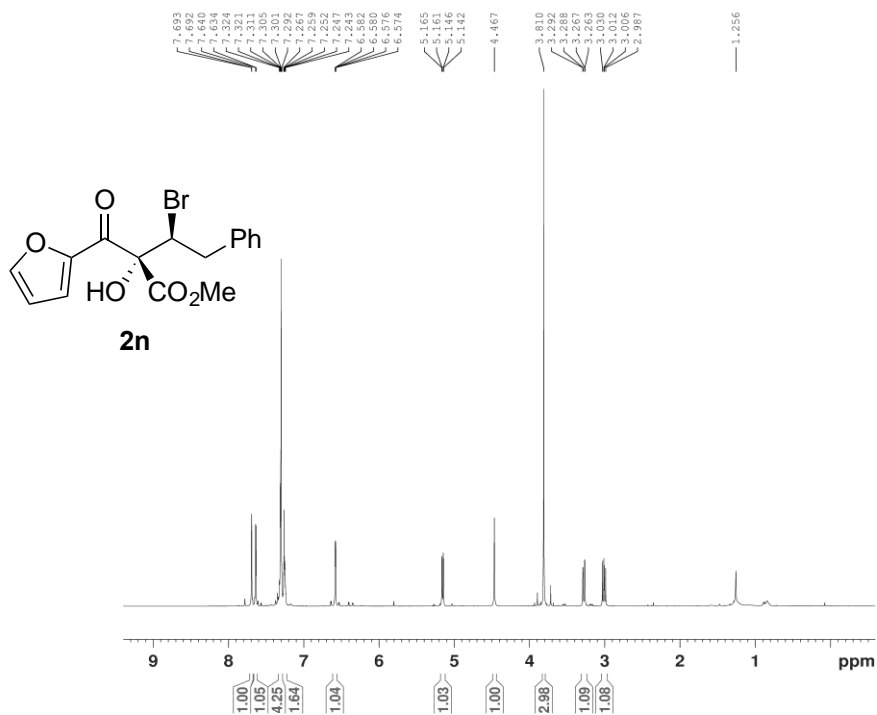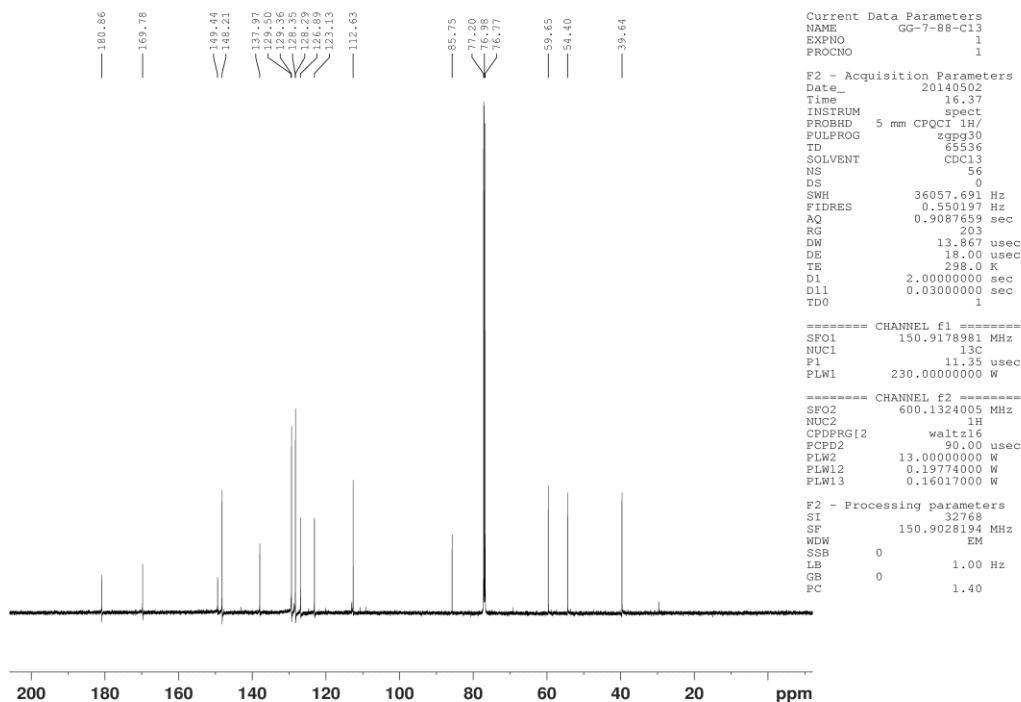

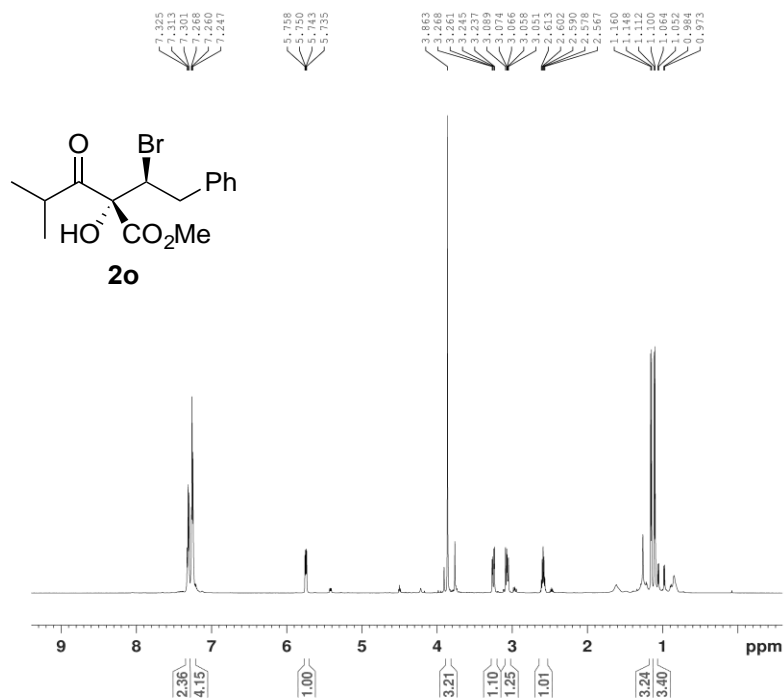

Current Data Parameters  
 NAME GG-7-24-2a  
 EXPNO 1  
 PROCNO 1

F2 - Acquisition Parameters  
 Date\_ 20140408  
 Time 7.27  
 INSTRUM spect  
 PROBHD 5 mm CPQNP 1H/  
 PULPROG zg30  
 TD 65536  
 SOLVENT CDCl3  
 NS 7  
 DS 0  
 SWH 12019.230 MHz  
 FIDRES 0.183399 Hz  
 AQ 2.7262976 sec  
 RG 32  
 DW 41.600 usec  
 DE 10.00 usec  
 TE 298.0 K  
 D1 1.00000000 sec  
 TD0 1

===== CHANNEL f1 =====  
 SFO1 600.1337060 MHz  
 NUC1 1H  
 P1 13.75 usec  
 PLW1 9.00000000 W

F2 - Processing parameters  
 SI 65536  
 SF 600.1300098 MHz  
 WDW EM  
 SSB 0  
 LB 0.30 Hz  
 GB 0  
 PC 1.00

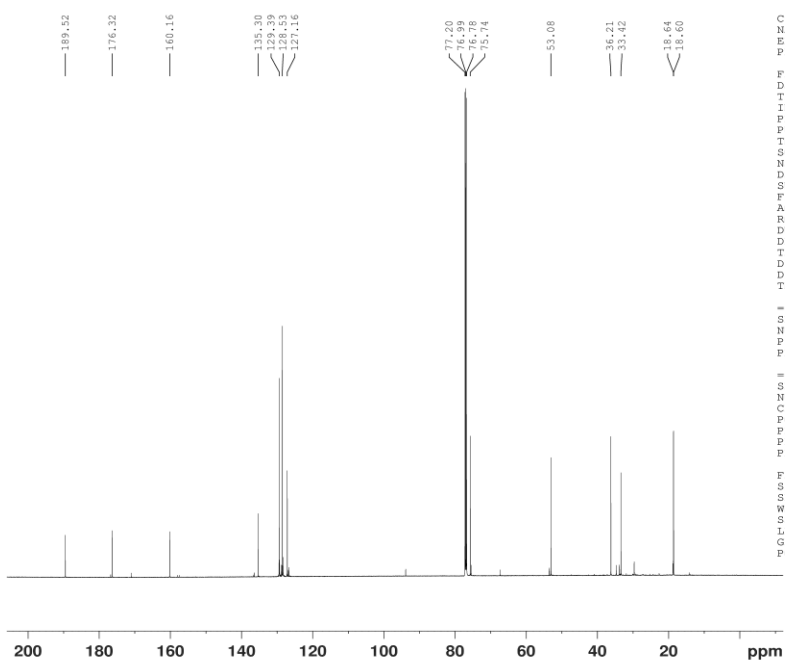

Current Data Parameters  
 NAME GG-7-24-2a-C13  
 EXPNO 1  
 PROCNO 1

F2 - Acquisition Parameters  
 Date\_ 20140408  
 Time 7.36  
 INSTRUM spect  
 PROBHD 5 mm CPQNP 1H/  
 PULPROG zgpg30  
 TD 65536  
 SOLVENT CDCl3  
 NS 953  
 DS 0  
 SWH 36057.691 MHz  
 FIDRES 0.550197 Hz  
 AQ 0.9087659 sec  
 RG 203  
 DW 13.867 usec  
 DE 18.00 usec  
 TE 298.0 K  
 D1 2.00000000 sec  
 D11 0.03000000 sec  
 TD0 1

===== CHANNEL f1 =====  
 SFO1 150.9178981 MHz  
 NUC1 13C  
 P1 11.25 usec  
 PLW1 30.00000000 W

===== CHANNEL f2 =====  
 SFO2 600.1324005 MHz  
 NUC2 1H  
 CPDPRG2 waltz16  
 PCPD2 80.00 usec  
 PLW2 9.00000000 W  
 PLW12 0.26587000 W  
 PLW13 0.17016000 W

F2 - Processing parameters  
 SI 32768  
 SF 150.9028162 MHz  
 WDW EM  
 SSB 0  
 LB 1.00 Hz  
 GB 0  
 PC 1.40

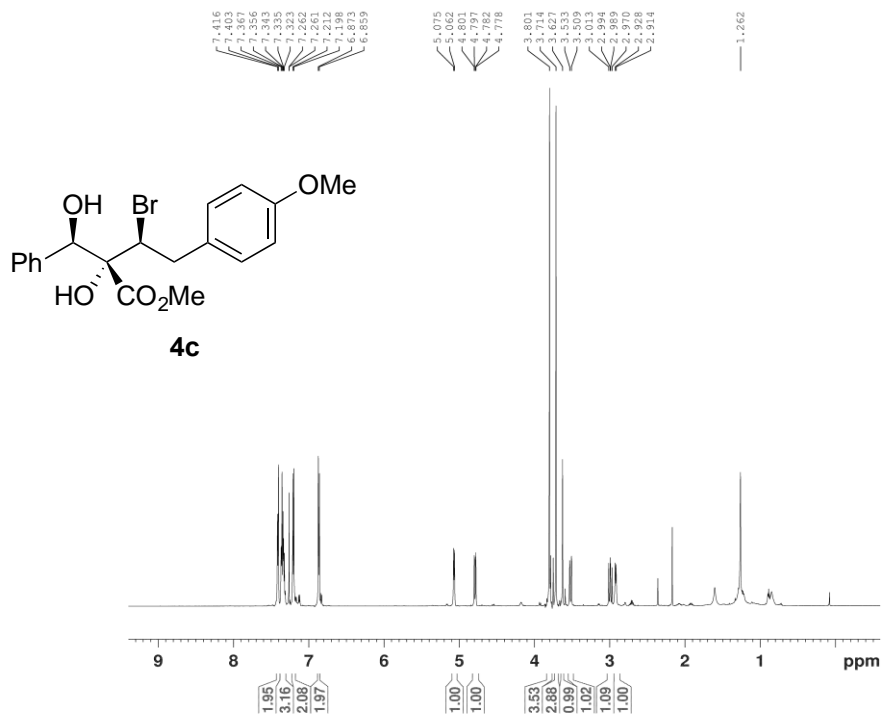

Current Data Parameters  
NAME GG-7-131-1a  
EXPNO 1  
PROCNO 1

F2 - Acquisition Parameters  
Date\_ 20140519  
Time 10.18  
INSTRUM spect  
PROBHD 5 mm CPQCI 1H/  
PULPROG zg30  
TD 65536  
SOLVENT CDCl3  
NS 10  
DS 0  
SWH 12019.230 MHz  
FIDRES 0.183399 Hz  
AQ 2.7262976 sec  
RG 18  
DW 41.600 usec  
DE 10.00 usec  
TE 298.0 K  
D1 1.00000000 sec  
D10 1

===== CHANNEL f1 =====  
SFO1 600.1337060 MHz  
NUC1 1H  
P1 11.00 usec  
PLW1 13.00000000 W

F2 - Processing parameters  
SI 65536  
SF 600.1300129 MHz  
WDW EM  
SSB 0  
LB 0.30 Hz  
GB 0  
PC 1.00

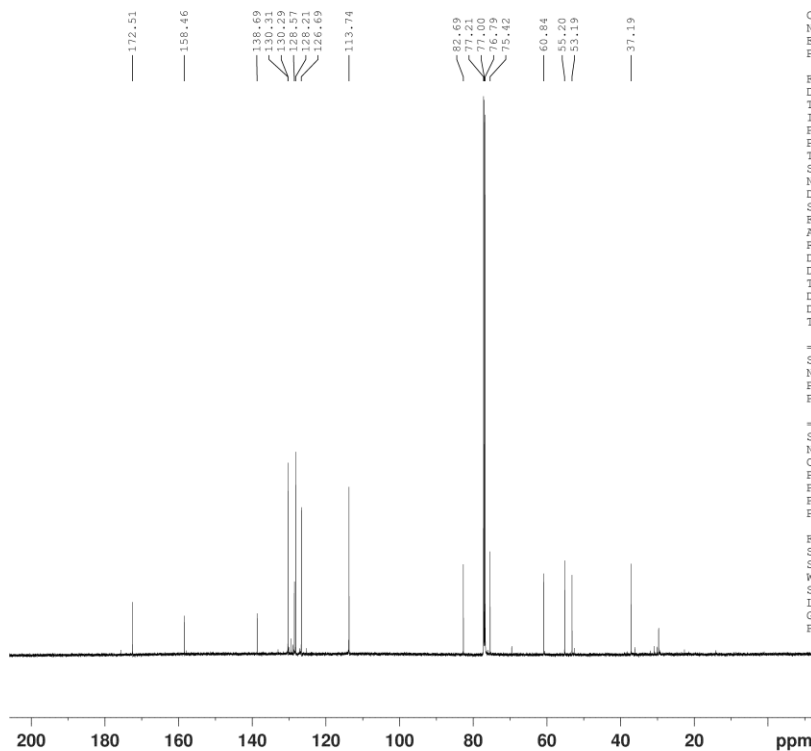

Current Data Parameters  
NAME GG-7-131-C13  
EXPNO 1  
PROCNO 1

F2 - Acquisition Parameters  
Date\_ 20140519  
Time 13.19  
INSTRUM spect  
PROBHD 5 mm CPQCI 1H/  
PULPROG zgpg30  
TD 65536  
SOLVENT CDCl3  
NS 173  
DS 0  
SWH 36057.691 Hz  
FIDRES 0.550197 Hz  
AQ 0.9087659 sec  
RG 203  
DW 13.867 usec  
DE 18.00 usec  
TE 298.0 K  
D1 2.00000000 sec  
D11 0.03000000 sec  
D10 1

===== CHANNEL f1 =====  
SFO1 150.9178981 MHz  
NUC1 13C  
P1 11.35 usec  
PLW1 230.00000000 W

===== CHANNEL f2 =====  
SFO2 600.1324005 MHz  
NUC2 1H  
CPDPRG2 waltz16  
PCPD2 90.00 usec  
PLW2 13.00000000 W  
PLW12 0.19774000 W  
PLW13 0.16017000 W

F2 - Processing parameters  
SI 32768  
SF 150.9028159 MHz  
WDW EM  
SSB 0  
LB 1.00 Hz  
GB 0  
PC 1.40

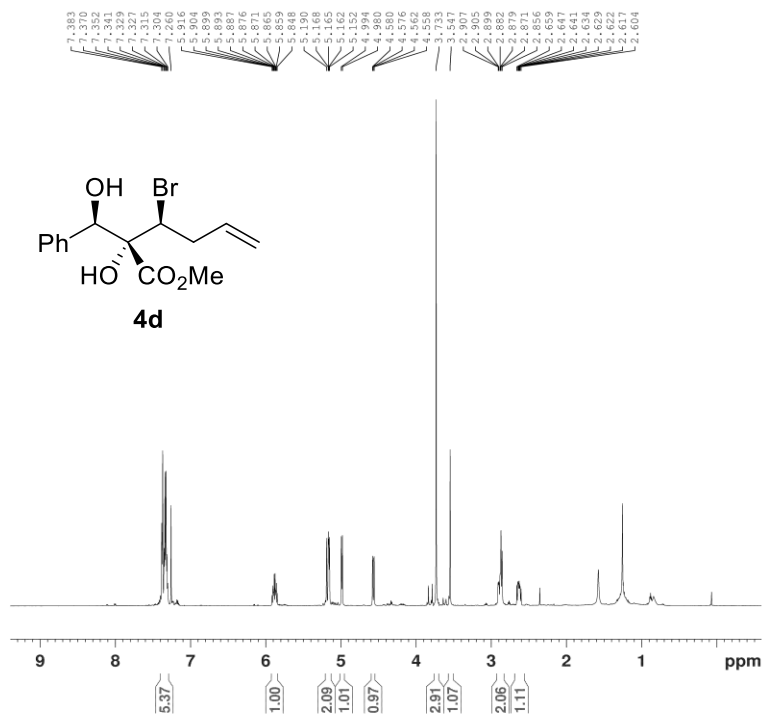

Current Data Parameters  
NAME GG-7-130-1a  
EXPNO 1  
PROCNO 1

F2 - Acquisition Parameters  
Date\_ 20140519  
Time 10.16  
INSTRUM spect  
PROBHD 5 mm CPQCI 1H/  
PULPROG zg30  
TD 65536  
SOLVENT CDCl3  
NS 7  
DS 0  
SWH 12019.230 MHz  
FIDRES 0.183399 Hz  
AQ 2.7262976 sec  
RG 20.2  
DW 41.600 usec  
DE 10.00 usec  
TE 298.0 K  
D1 1.00000000 sec  
TD0 1

===== CHANNEL f1 =====  
SFO1 600.1337060 MHz  
NUC1 1H  
P1 11.00 usec  
PLW1 13.00000000 W

F2 - Processing parameters  
SI 65536  
SF 600.1300145 MHz  
WDW EM  
SSB 0  
LB 0.30 Hz  
GB 0  
PC 1.00

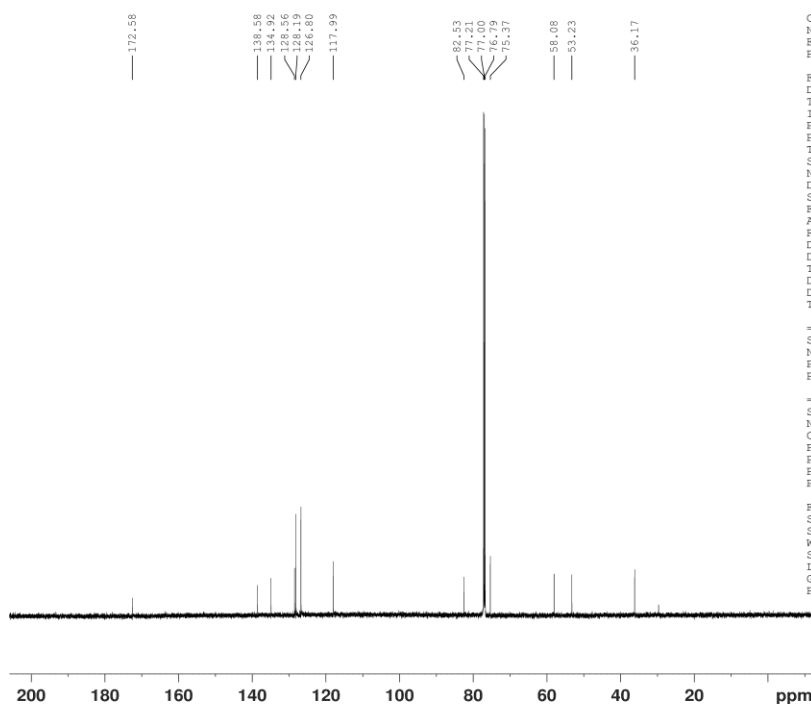

Current Data Parameters  
NAME GG-7-130-cl3  
EXPNO 1  
PROCNO 1

F2 - Acquisition Parameters  
Date\_ 20140519  
Time 13.10  
INSTRUM spect  
PROBHD 5 mm CPQCI 1H/  
PULPROG zgpg30  
TD 65536  
SOLVENT CDCl3  
NS 35  
DS 0  
SWH 36057.691 MHz  
FIDRES 0.550197 Hz  
AQ 0.9087659 sec  
RG 203  
DW 13.867 usec  
DE 18.00 usec  
TE 298.0 K  
D1 2.00000000 sec  
D11 0.03000000 sec  
TD0 1

===== CHANNEL f1 =====  
SFO1 150.9178981 MHz  
NUC1 13C  
P1 11.35 usec  
PLW1 230.00000000 W

===== CHANNEL f2 =====  
SFO2 600.1324005 MHz  
NUC2 1H  
CPDPRG2 waltz16  
PCPD2 90.00 usec  
PLW2 13.00000000 W  
PLW12 0.19774000 W  
PLW13 0.16017000 W

F2 - Processing parameters  
SI 32768  
SF 150.9028140 MHz  
WDW EM  
SSB 0  
LB 1.00 Hz  
GB 0  
PC 1.40

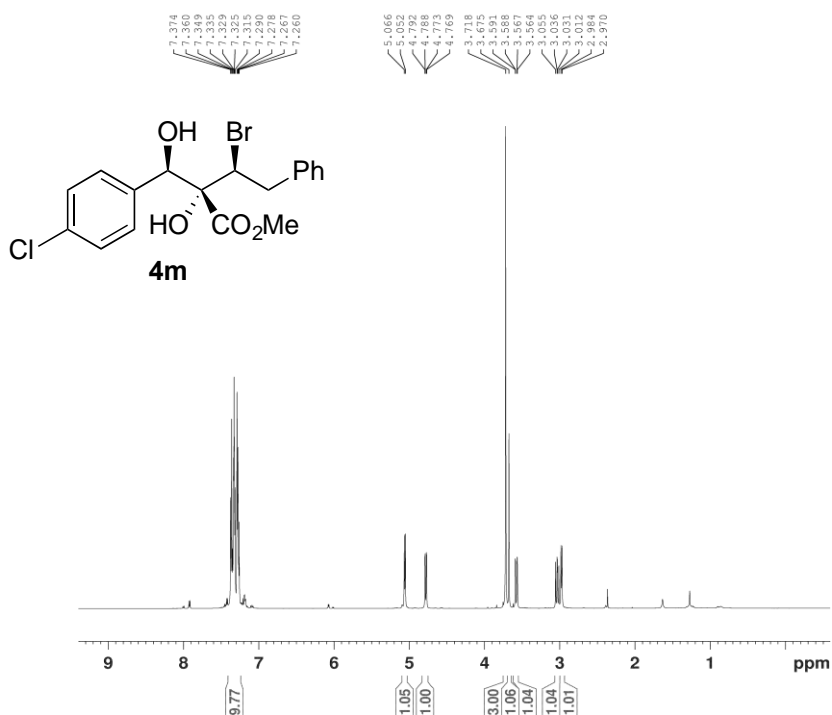

Current Data Parameters  
NAME GG-7-132-rec  
EXPNO 1  
PROCNO 1

F2 - Acquisition Parameters  
Date\_ 20140614  
Time 14.49  
INSTRUM spect  
PROBHD 5 mm CPQCI 1H/  
PULPROG zg30  
TD 65536  
SOLVENT CDCl3  
NS 7  
DS 0  
SWH 12019.230 MHz  
FIDRES 0.183399 Hz  
AQ 2.7262976 sec  
RG 12.7  
DW 41.600 usec  
DE 10.00 usec  
TE 298.2 K  
D1 1.00000000 sec  
TD0 1

===== CHANNEL f1 =====  
SFO1 600.1337060 MHz  
NUC1 1H  
P1 11.00 usec  
PLW1 13.00000000 W

F2 - Processing parameters:  
SI 65536  
SF 600.1300140 MHz  
WDW EM  
SSB 0  
LB 0.30 Hz  
GB 0  
PC 1.00

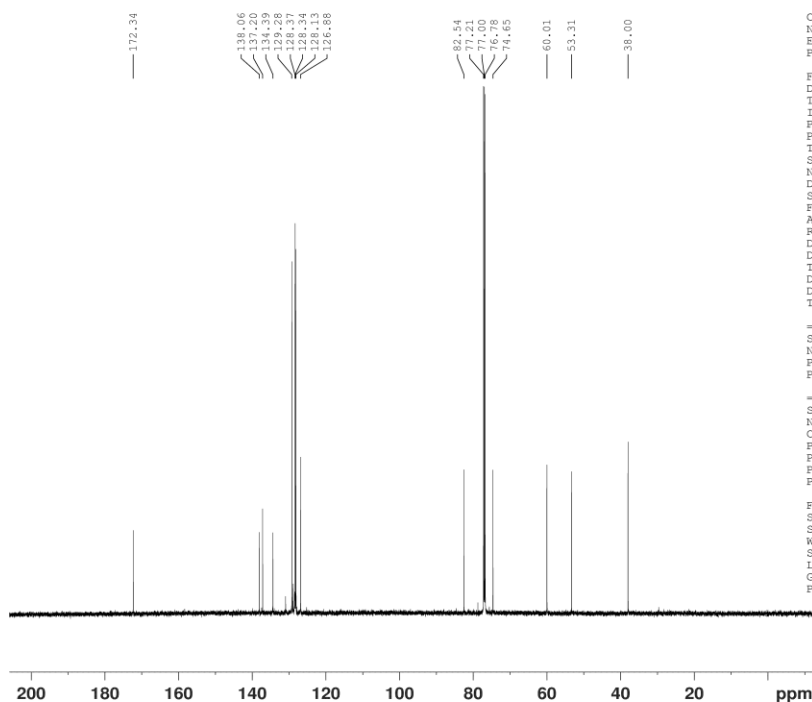

Current Data Parameters  
NAME GG-7-132-Cl3  
EXPNO 1  
PROCNO 1

F2 - Acquisition Parameters  
Date\_ 20140614  
Time 14.51  
INSTRUM spect  
PROBHD 5 mm CPQCI 1H/  
PULPROG zgpg30  
TD 65536  
SOLVENT CDCl3  
NS 32  
DS 0  
SWH 36057.691 MHz  
FIDRES 0.550197 Hz  
AQ 0.9087659 sec  
RG 203  
DW 13.867 usec  
DE 18.00 usec  
TE 298.1 K  
D1 2.00000000 sec  
D11 0.03000000 sec  
TD0 1

===== CHANNEL f1 =====  
SFO1 150.9178981 MHz  
NUC1 13C  
P1 11.35 usec  
PLW1 230.00000000 W

===== CHANNEL f2 =====  
SFO2 600.1324005 MHz  
NUC2 1H  
CPDPRG2 waltz16  
PCPD2 90.00 usec  
PLW2 13.00000000 W  
PLW12 0.19774000 W  
PLW13 0.16017000 W

F2 - Processing parameters  
SI 32768  
SF 150.9028206 MHz  
WDW EM  
SSB 0  
LB 1.00 Hz  
GB 0  
PC 1.40

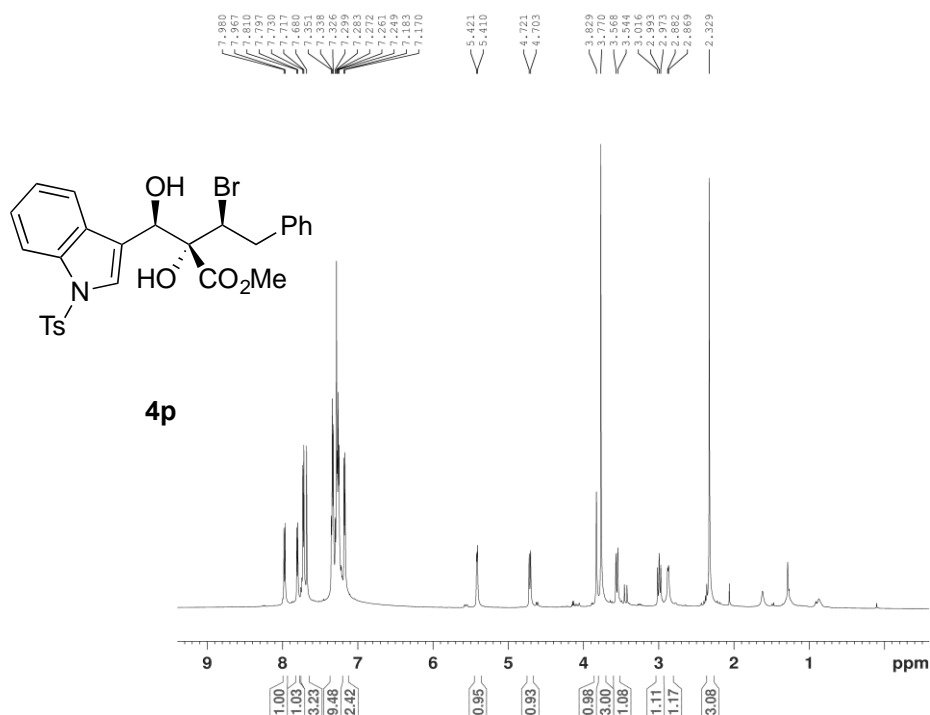

Current Data Parameters  
NAME GG-7-144-1  
EXPNO 1  
PROCNO 1

F2 - Acquisition Parameters  
Date\_ 20140523  
Time 10.53  
INSTRUM spect  
PROBHD 5 mm CPQCI 1H/  
PULPROG zg30  
TD 65536  
SOLVENT CDC13  
NS 12  
DS 0  
SWH 12019.230 MHz  
FIDRES 0.183399 Hz  
AQ 2.7262976 sec  
RG 18  
DW 41.600 nsec  
DE 10.00 nsec  
TE 298.1 K  
D1 1.00000000 sec  
TD0 1

===== CHANNEL f1 =====  
SFO1 600.1337060 MHz  
NUC1 1H  
P1 11.00 nsec  
PLW1 13.00000000 W

F2 - Processing parameters:  
SI 65536  
SF 600.1300000 MHz  
WDW EM  
SSB 0  
LB 0.30 Hz  
GB 0  
PC 1.00

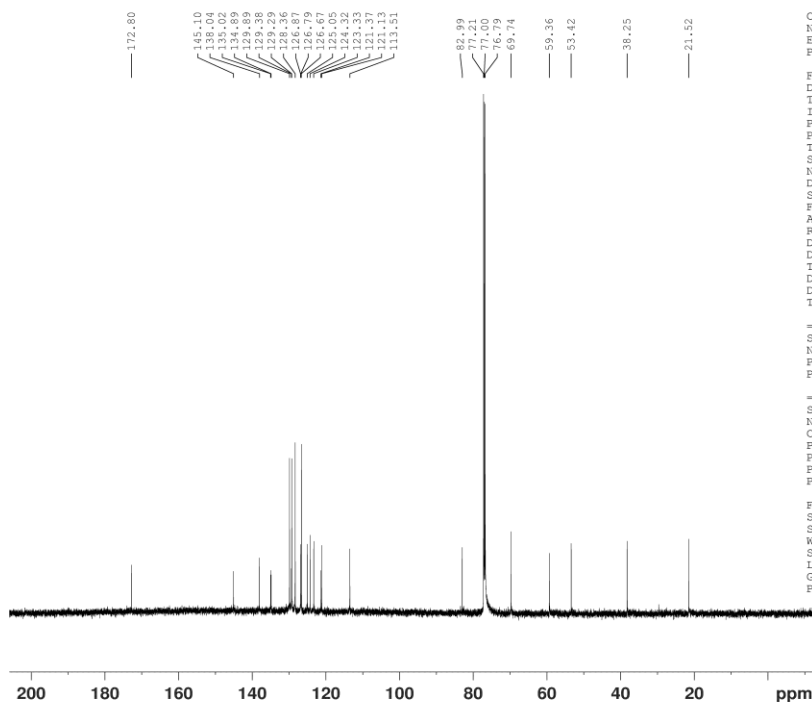

Current Data Parameters  
NAME GG-7-144-Cl3  
EXPNO 1  
PROCNO 1

F2 - Acquisition Parameters  
Date\_ 20140523  
Time 10.58  
INSTRUM spect  
PROBHD 5 mm CPQCI 1H/  
PULPROG zgpg30  
TD 65536  
SOLVENT CDC13  
NS 70  
DS 0  
SWH 36057.691 MHz  
FIDRES 0.550197 Hz  
AQ 0.9087659 sec  
RG 203  
DW 13.867 usec  
DE 18.00 usec  
TE 298.1 K  
D1 2.00000000 sec  
D11 0.03000000 sec  
TD0 1

===== CHANNEL f1 =====  
SFO1 150.9178981 MHz  
NUC1 13C  
P1 11.35 usec  
PLW1 230.00000000 W

===== CHANNEL f2 =====  
SFO2 600.1324005 MHz  
NUC2 1H  
CPDPRG2 waltz16  
PCPD2 90.00 usec  
PLW2 13.00000000 W  
PLW12 0.19774000 W  
PLW13 0.16017000 W

F2 - Processing parameters  
SI 32768  
SF 150.9028161 MHz  
WDW EM  
SSB 0  
LB 1.00 Hz  
GB 0  
PC 1.40

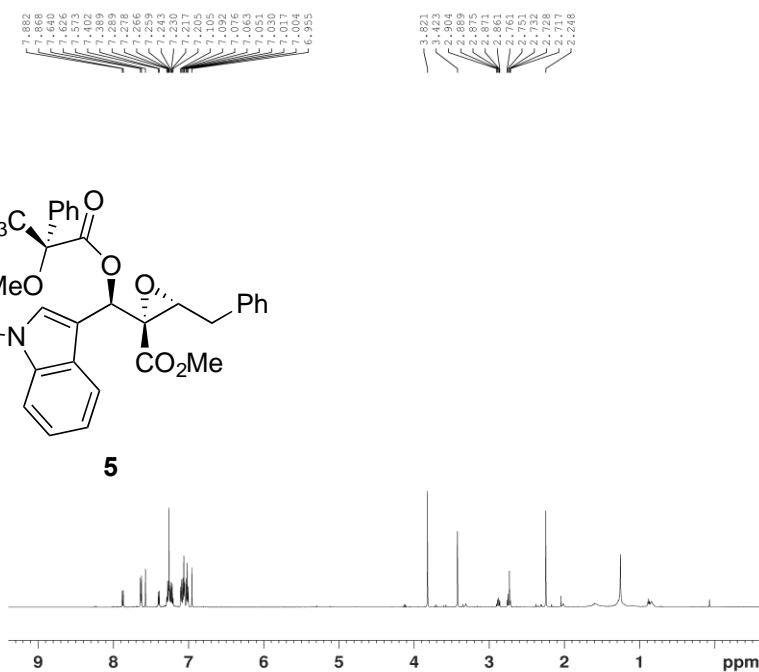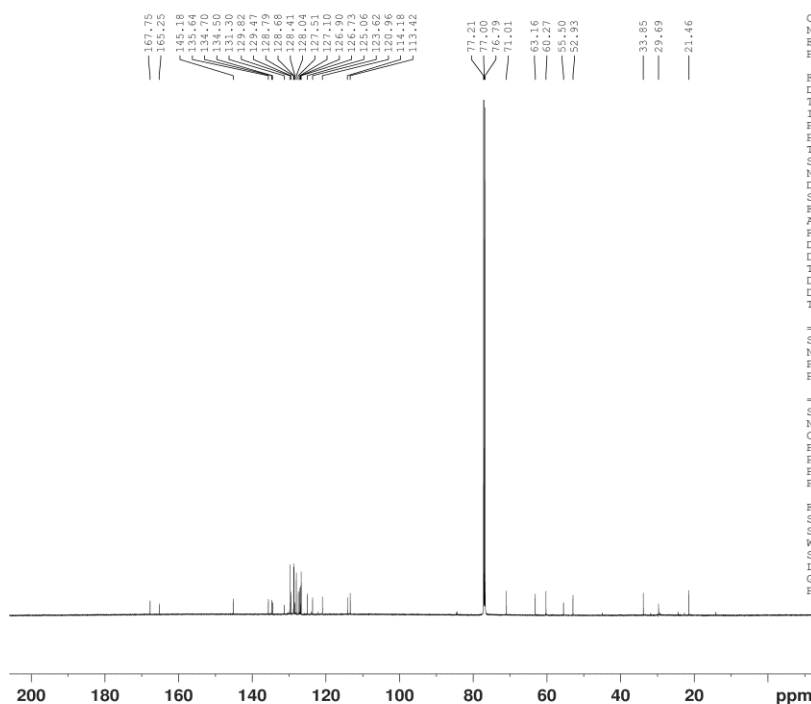



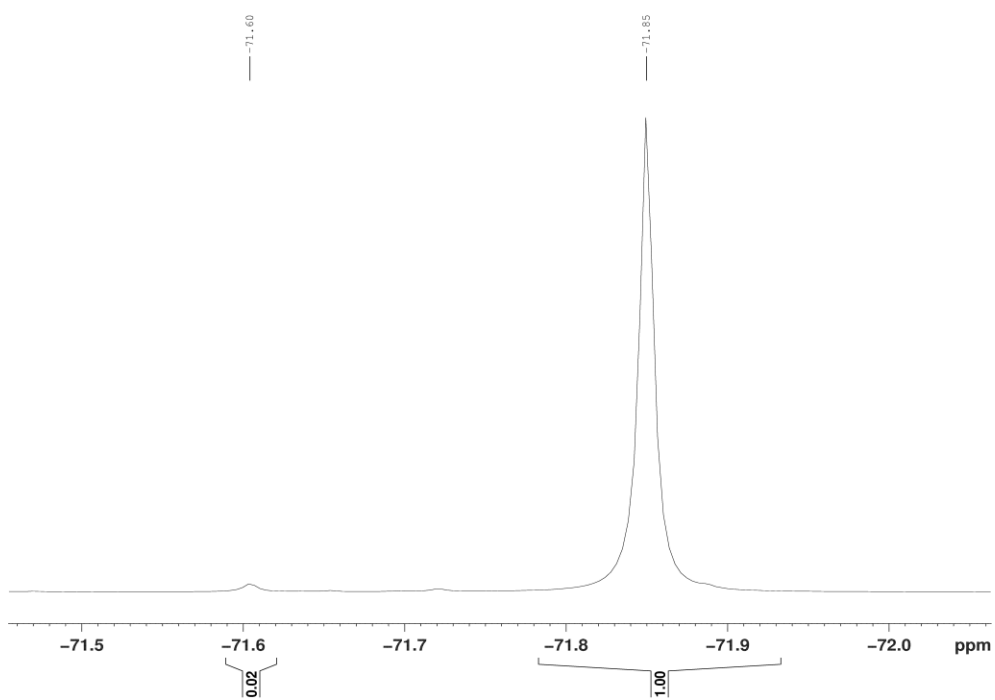

Supplement: Supplementary file 1 [file 3613860]
